# Supplementary material for: Synthesis design using mass related metrics, environmental metrics, and health metrics
Source: publisher site journal article supplement (doi:10.1515/pac-2021-0326), 2022-02-01
Supplement: Supplementary file 1 [file pac-2021-0326_suppl_001_Application_STOFFENMANAGER.docx]

**Supporting Information**

Concerning the article

Synthesis design using mass related metrics, environmental metrics, and health metrics

Pure and Applied Chemistry

Marco Eissen

Content

[1 Health 2](#_Toc90243395)

[1.1 Application of the ‘Stoffenmanager’ to chemical processes 2](#_Toc90243396)

[1.1.1 Determination of the vapour pressure 2](#_Toc90243397)

[1.1.2 Determination of the health index 3](#_Toc90243398)

[1.1.3 Derivation of B^(ln(c)/ln(100)) (used in Table 13 and equation (14)) 10](#_Toc90243399)

[1.1.4 Derivation of ‘d’ from ‘b’ and ‘c’ (used in Table 14 and equation (17)) 11](#_Toc90243400)

[1.1.5 Tables in the literature concerning the ‘Stoffenmanager’ 12](#_Toc90243401)

[2 Supporting tables and figures… 14](#_Toc90243402)

[2.1 … regarding environmental issues 14](#_Toc90243403)

[2.2 … regarding the case study 14](#_Toc90243404)

# Health

## Application of the ‘Stoffenmanager’ to chemical processes

Health hazards result from the intrinsic hazard and the exposure of chemicals. Different models exist to consider both aspects for assessment purposes. Regarding hazards, we have considered the methodology of the ‘Stoffenmanager’ which we have adapted to our purpose.

Exposure depends on the vapour pressure of a chemical. Thus, before presenting the determination of the health index (chapter 1.1.2) the vapour pressure shall be considered according to the literature [114] (chapter 1.1.1).

### Determination of the vapour pressure

The vapour pressure is dependent on temperature. Considering the Clausius-Clapeyron equation

(equation (5a))

a) b)  (5)

where,

*ΔvapH* is the difference in enthalpy between one mole of the saturated liquid and the saturated vapour, or the heat of vapourisation in J mol‑1;

*R* is the gas constant, 8.315 J K‑1 mol‑1;

*T* is the temperature (K); *TBP* is the boiling temperature (K) at *p1* = 1 atm.

With *p1* = 1 atm as pressure for normal boiling point temperature, *T1* corresponds to the boiling temperature. That is, the vapour pressure of a substance can be calculated for a distinctive temperature *T2* by equation (5b).

Combining the Clausius-Clapeyron equation with Trouton’s rule suggests that the vapour pressure can be approximated by equation (6).

(6)

where

*pi* is the vapour pressure (atm),

*TBP* is the boiling point temperature of the liquid (K),

*T* is the temperature of the liquid (K).

A more accurate equation is the Antoine equation (7).

(7)

where

*T* is the temperature (°C);

*pi* is the vapour pressure (mmHg);

A, B and C are Antoine constants for a given temperature range.

The vapour pressure of a substance in a mixture depends on the mole fraction and an activity coefficient (equation (8)).

(8)

where

*pi,mix* is the vapour pressure of the ith component in the mixture;

*γi* is the activity coefficient of the ith component at a given mole fraction;

*xi* is the mole fraction of component i in the liquid;

*pi* is the vapour pressure of the ith component when pure.

However, the activity coefficient is not readily available and would have to be determined for each mixture. Thus, for pragmatic reasons this parameter will not be considered for the moment. Additionally, the mass fraction is more easily available than the mole fraction and will be used instead.

### Determination of the health index

#### Pathway: inhalation

In principle, a hazard band and an exposure band have to be determined according to the intrinsic hazard of a chemical, e.g. via hazard statements (Table 10), and according to handling, protection measures etc. (see equation (10) and ESI Table 21).

Table 10 Allocation of R-phrases or GHS phrase (Global Harmonized System) to Hazard Group; concentration range, according to the British COSHH essentials[67] (Control of Substances Hazardous to Health Regulations)

| Hazard Group | Type | Concentration range | Units | R-phrases | H-statements |
| --- | --- | --- | --- | --- | --- |
| A | Dust | > 1 to 10 | mg/m3 | R36, R38 and all R-numbers not otherwise listed | H303, H304, H305, H313, H315, H316, H318, H319, H320, H333, H336 and all H-numbers not otherwise listed |
| Vapour | > 50 to 500 | ppm |
| B | Dust | > 0.1 to 1 | mg/m3 | R20/21/22 and R68/20/21/22 | H302, H312, H332, H371 |
| Vapour | > 5 to 50 | ppm |
| C | Dust | > 0.01 to 0.1 | mg/m3 | R23/24/25, R34, R35, R37, R39/23/24/25, R41, R43, R48/20/21/22, R68/23/24/25, | H301, H311, H314, H317, H318, H331, H335, H370, H373 |
| Vapour | > 0.5 to 5 | ppm |
| D | Dust | < 0.01 | mg/m3 | R26/27/28, R39/26/27/28, R40, R48/23/24/25, R60, R61, R62, R63, R64 | H300, H310, H330, H351, H360, H361, H362, H372 |
| Vapour | < 0.5 | ppm |
| E | Dust | - | mg/m3 | R42, R45, R46, R49, R68 | H334, H340, H341, H350 |
| Vapour | - | ppm |

In combination, both results deliver a so called priority band (1 to 3, Table 11).

Table 11 Repetition of Table 5 for the purpose of overview in this Supporting Information: Priority bands in the Stoffenmanager. Hazard: A = lowest hazard and E = highest hazard. Exposure: 1 = lowest exposure and 4 = highest exposure. Overall result: 1 = highest priority and 3 = lowest priority. [73]

|  | A | B | C | D | E |
| --- | --- | --- | --- | --- | --- |
| 1 | 3 | 3 | 3 | 2 | 1 |
| 2 | 3 | 3 | 2 | 2 | 1 |
| 3 | 3 | 2 | 2 | 1 | 1 |
| 4 | 2 | 1 | 1 | 1 | 1 |

The risk band ‘1’ means that the exposure or hazard scenario will have to be reconsidered in a feedback loop (see Fig. 1 of the literature [73]).

In a chemical production process there are many substances and several production units and operations, each comprising corresponding health hazards. Their assessment, possibly in comparison to alternative technological solutions or to alternative synthetic protocols, can contribute to the improvement of health conditions of a production process. In order to receive an overall picture of the potential health hazard, the determination of something such as ‘health scores’ for single production units, which show more differing values than given in Table 11, is necessary. Table *12* proposes potential scenarios, of which a) shows a trend similar to that given in Table 11: from ‘good’ (top left) to ‘bad’ (downright).

Table 12 Health scores (for inhalation hazard) according to hazard and exposure band. The higher the value the more problematic a substance is. The difference within the hazard and exposure band cannot scientifically be substantiated and is more or less arbitrary. The application of these health scores is flexible (see example a) and b)) and should be part of a sensitivity analysis. Exemplarily, c) shows an extreme scenario. See Table 14 for more details.

a) A substance in a hazard band is considered twice as problematic as a substance in a lower hazard band. The same is valid for the exposure bands.

|  | A | B | C | D | E |
| --- | --- | --- | --- | --- | --- |
|  |  |  |  |  |
| 1 | 0,0078125 | 0,015625 | 0,03125 | 0,0625 | 0,125 |
| 2 | 0,015625 | 0,03125 | 0,0625 | 0,125 | 0,25 |
| 3 | 0,03125 | 0,0625 | 0,125 | 0,25 | 0,5 |
| 4 | 0,0625 | 0,125 | 0,25 | 0,5 | 1 |

b) A substance in a hazard band is considered four times more problematic than a substance in a lower hazard band. There is a factor of 5 from one exposure band to another.

|  | A | B | C | D | E |
| --- | --- | --- | --- | --- | --- |
|  |  |  |  |  |
| 1 | 0,00003125 | 0,000125 | 0,0005 | 0,002 | 0,008 |
| 2 | 0,00015625 | 0,000625 | 0,0025 | 0,01 | 0,04 |
| 3 | 0,00078125 | 0,003125 | 0,0125 | 0,05 | 0,2 |
| 4 | 0,00390625 | 0,015625 | 0,0625 | 0,25 | 1 |

c) Extreme scenario: Substances are considered equally problematic independently from their hazard band. There is a factor of 5 from one exposure band to another.

|  | A | B | C | D | E |
| --- | --- | --- | --- | --- | --- |
|  |  |  |  |  |
| 1 | 0,008 | 0,008 | 0,008 | 0,008 | 0,008 |
| 2 | 0,04 | 0,04 | 0,04 | 0,04 | 0,04 |
| 3 | 0,2 | 0,2 | 0,2 | 0,2 | 0,2 |
| 4 | 1 | 1 | 1 | 1 | 1 |

Hazard and exposure are independent from one another, and a high hazard chemical at low exposure and a low hazard chemical at high exposure may result in comparable risk levels.[74] Though this principle is outlined in Table *12*a, other scenarios such as those exemplarily demonstrated in Table *12*b and c should be considered in order to conduct a sensitivity analysis.

The exposure band is a classification of the exposure score according to Table 13.

Table 13 Assignment of exposure scores (B, equation 9) to exposure bands (see Table 12 of the literature[73])

| Exposure band | Minimum exposure score | Maximum exposure score |
| --- | --- | --- |
| 1 | 0 | 0.00002 |
| 2 | 0.00002 | 0.002 |
| 3 | 0.002 | 0.2 |
| 4 | 0.2 | 20 |

Instead of considering the exposure band, the exposure scores B (equation (9)) can be applied directly.

(9)

where B = exposure scores; Ct = total concentration (score); *th* = score for duration of exposure (see Table 10 in the literature [73]); *fh* = score for frequency of exposure (see Table 11 in the literature [73]).

The total concentration is made up of background concentration, near-field and far-field sources which can be controlled by corresponding measures. Thus, the final equation is

(10)

= multiplier for the reduction of exposure due to control measures of the worker (see Table 8 and 9 in the literature [73]); E = intrinsic emission score (for solids see Table 1 in the literature [73]); a = multiplier for the relative influence of background sources (see Table 7 in the literature [73]); H = handling (or task) score (see ESI: Table 16 and Table 17); = multiplier for the effect of local control measures (see Table 4 in the literature [73]);  = multiplier for the effect of general ventilation in relation to the room size on the exposure due to near-field sources (see Table 5 in the literature [73]) and  = multiplier for the effect of general ventilation in relation to the room size on the exposure due to far-field sources (see Table 6 in the literature [73]).

The intrinsic emission is calculated as

(11)

where E = intrinsic emission for a liquid and PSubstance = vapour pressure of the product (Pa). As substances with a vapour pressure ≥ 30000 Pa are fully evaporated in a very short time, E represents a relative evaporation factor. Marquart et al. [73] proposed to consider the percentage weighted intrinsic emission according to equation (12) when a product contains more volatile substances. The intrinsic emission for a solid is adjusted to the degree of dustiness (for solids see Table 1 in the literature [73]).

(12)

where *PSubstance_i* = vapour pressure of substance i and fi = fraction of substance i in the product (corresponding to xi used in equation (8)).

Relating this approach to the assessment of a chemical production process means to calculate a mass balance of each production unit and to determine an intrinsic emission for each substance. Different substances, however, may have different hazard bands. Consequently, a mixture with varying hazardous substances cannot be subjected to Table 11 or Table *12* in order to determine a priority band or a health score. Instead, each substance has to be considered separately (equation (13)) using equation (8).

(13)

where

*Ei* is the intrinsic emission of component i.

γi is the activity coefficient of the ith component at a given mole fraction. For pragmatic reasons, it is considered to be γi = 1, because it is not readily available;

xi is the mole fraction of component i in the liquid. For pragmatic reasons, the mass fraction is preferred;

*pi* is the vapour pressure of the ith component when pure (see equations (5-7)).

The exposure score B will have to be weighted considering the hazard band. The idea introduced in Table *12* considers equation (14), which is exemplified in detail in Table 14.

(14)

where HSInhalation = health score (inhalation); WE = weighting factor for exposure; WH = weighting factor for hazard; B = exposure score (see equation (10)); c = factor between exposure bands (see chapter 1.1.3 for a derivation of the expression ).

Table 14 Realisation[a] of Table 12ab: construction of health scores (HS). The Online Supporting Information provides a corresponding Excel file.

(j_pac-2021-0326_suppl_004_STOFFENMANAGER_MODIFICATION_construction_of_health_scores.xls)

a) Example: b = 2 and c = 2

| Basis ‚b’ for hazard bands= | | | 2 | Hazard band: | A | B | C | D | E |
| --- | --- | --- | --- | --- | --- | --- | --- | --- | --- |
| Factor ‚c’ between exposure bands= | | | 2 | Hazard band as number (h): | 1 | 2 | 3 | 4 | 5 |
|  |  |  | | bh: | 2 | 4 | 8 | 16 | 32 |
|  |  |  | | Weighting factor for hazard (WH): | 0,0625 | 0,125 | 0,25 | 0,5 | 1 |
| Exposure band | Maximum exposure score[b] | Modified maximum exposure score | | Weighting factor for exposure (WE) ↓: |  |  |  |  |  |
| 1 | 0,00002 | 0,19621606 | | 0,125 | 0,0078125 | 0,015625 | 0,03125 | 0,0625 | 0,125 |
| 2 | 0,002 | 0,39243211 | | 0,25 | 0,015625 | 0,03125 | 0,0625 | 0,125 | 0,25 |
| 3 | 0,2 | 0,78486422 | | 0,5 | 0,03125 | 0,0625 | 0,125 | 0,25 | 0,5 |
| 4 | 20 | 1,56972844 | | 1 | 0,0625 | 0,125 | 0,25 | 0,5 | 1 |

b) Example: b = 4 and c = 5

| Basis ‚b’ for hazard bands= | | | 4 | Hazard band: | A | B | C | D | E |
| --- | --- | --- | --- | --- | --- | --- | --- | --- | --- |
| Factor ‚c’ between exposure bands= | | | 5 | Hazard band as number (h): | 1 | 2 | 3 | 4 | 5 |
|  |  |  | | bh: | 4 | 16 | 64 | 256 | 1024 |
|  |  |  | | Weighting factor for hazard (WH): | 0,00390625 | 0,015625 | 0,0625 | 0,25 | 1 |
| Exposure band↓: | Maximum exposure score[b] | Modified maximum exposure score | | Weighting factor for exposure (WE) ↓: |  |  |  |  |  |
| 1 | 0,00002 | 0,0227919 | | 0,008 | 0,00003125 | 0,000125 | 0,0005 | 0,002 | 0,008 |
| 2 | 0,002 | 0,11395948 | | 0,04 | 0,00015625 | 0,000625 | 0,0025 | 0,01 | 0,04 |
| 3 | 0,2 | 0,5697974 | | 0,2 | 0,00078125 | 0,003125 | 0,0125 | 0,05 | 0,2 |
| 4 | 20 | 2,84898702 | | 1 | 0,00390625 | 0,015625 | 0,0625 | 0,25 | 1 |

[a] The numbering of the hazard band delivers values ‘h’ from 1 to 5. Considering a basis (in a) b = 2 and in b) b = 4) values bh can be determined which, by dividing by the maximum, deliver a weighting factor for hazard (WH). Instead of considering the exposure band which results from a clustering of a large range of exposure scores, the latter can be used directly with this calculation: . The value ‘c’ is a more or less arbitrary factor from one exposure band to another enabling a sensitivity analysis regarding the meaning of precautionary measures on exposure. Originally, c is 100 (see maximum exposure score). Exemplarily, the maximum exposure scores were considered resulting in the ‘modified maximum exposure scores’ applying c = 2 and c = 5, respectively, in a) and b). The weighting factors for exposure (WE) result from division by the maximum. Thus, the health scores shown downright result from a multiplication: . [b] According to Table 13.

Health scores (HS (inhalation), see equation 14) will have to be determined for each substance and to be added (equation (15)).

(15)

where HIInhalation = health index (inhalation); HSInhalation, i= health score (inhalation) for substance i related to a specific synthesis (see equation (14)).

As a substance will emerge in several synthesis steps or isolation procedures, mostly, more than one health score HS will be considered for one substance.

By means of equation (15) health indices can be determined for a synthesis (Fig. 34a) and be compared to alternative protocols or synthesis variants. Several health scores are possible for one and the same substance, e.g., when there are different local control measures during a production. For example, small amounts of a substance may be released during its feed into a reaction vessel (i.e. H = 0.1, see equation (10)), but during reaction tightly closed containers are used (i.e. H = 0.0).

Priority bands (Table 11) reveal where technological or other measures have to be taken. However, in early synthesis design the choice of alternative routes is broad (Fig. 34b) and a thorough examination considering ‘handling’ etc. (see equation (10)) will not be possible if only a rough overview of health aspects is of interest.

a)

b)

Fig. 34 a) One reaction step: product and waste result from the conversion of raw materials; b) Several and alternative reaction steps to obtain a product. Alternatives (see alternative 2) include subalternatives. [111] - Reproduced by permission of John Wiley and Sons.

Therefore, in a first approach, it is sufficient to consider the reaction temperature, and, possibly, also reaction time. Thus, equation (10) melts down to or . For those synthesis sequences that could be relevant for a production process, details according to equation (10) should be considered. However, information such as the boiling point, which is a physical property of a chemical, is readily available. Thus, according to equation (6) with either room temperature (default value) or reaction temperature, the exposure score B and, thus, the health index (equation (15)) can automatically be determined.

#### Pathway: skin

The integration of different exposure pathways such as inhalation and skin exposure is considered to be important for a comprehensive assessment, but also requires skills that could not be integrated into the Stoffenmanager as an easily applied toolkit. [74] However, considering that the idea is to provide a means to measure a potential health hazard in early synthesis design, a simple addition of health scores should be constructive (equation (16)).

(16)

where HI = health index, HIInhalation = health index (inhalation) (see equation (15)), HISkin =  health index (skin) according to local and systemic health effects.

The health indices of both exposure pathways need to have the same magnitude to make sure that one does not dominate or overlay the other.This means, coming back to the examples in Table *12*, health score ranges such as 0.0078125 to 1 (Table *12*a), 0.00003125 to 1 (Table *12*b) and 0.008 to 1 (Table *12*c) should be the same for HISkin. Therefore, the health risk score, which takes values from 1 to 10 according to the Stoffenmanager[74] (meaning from “no action” for the value 1 to “substitute in any case, stop working” for 10), has to be transformed into the same value range: equation (17) was applied in Table 15 to determine health index (skin) for three examples of ‘b’ and ‘c’ values.

Table 15 Health index (skin): Allocation of health risk scores 1 to 10, which are results from literature-Tables 9 [74] and 14 [74], to health indices (skin) according to ranges of values accruing from the choice of ‘b’ and ‘c’ (see Table 14). The Online Supporting Information holds available a corresponding Excel file (j_pac-2021-0326_suppl_004_STOFFENMANAGER_MODIFICATION_construction_of_health_scores.xls).

| Value ranges of | b[a] | c[a] | d[b] |  | Health risk scores  = hrs | | | | | | | | | |
| --- | --- | --- | --- | --- | --- | --- | --- | --- | --- | --- | --- | --- | --- | --- |
| 1 | 2 | 3 | 4 | 5 | 6 | 7 | 8 | 9 | 10 |
| Table 12a | 2 | 2 | 1.71448797 |  | 0.0078125 | 0.01339[c] | 0.02296 | 0.03937 | 0.0675 | 0.1157 | 0.1984 | 0.3402 | 0.5833 | 1 |
| Table 12b | 4 | 5 | 3.16644698 |  | 0.00003125 | 0.000099 | 0.00031 | 0.00099 | 0.0031 | 0.0099 | 0.0315 | 0.0997 | 0.3158 | 1 |
| Table 12c | 1 | 5 | 1.70997595 |  | 0.008 | 0.0137 | 0.0234 | 0.04 | 0.0684 | 0.117 | 0.2 | 0.342 | 0.5848 | 1 |

[a] The definition of ‘b’ and ‘c’ is given in Table 14. [b] These values are the appropriate basis to form the desired ranges of values which Table 14 predetermines with ‘b’ and ‘c’. According to equation (17) (see chapter 1.1.4 for a derivation of the value ‘d’) the health index is determined, e.g. the health index (skin) = 0.01339 results from (see [c]).

(17)

, where HISkin = health index (skin), d = function of ‘b’ and ‘c’ (see Table 14) as an appropriate basis to deliver the same range of values for HISkin as the application of ‘b’ and ‘c’ for HIInhalation, hrs = health risk scores [1; 2; …; 10] according to literature-Table 9 and 14 [74] (see ESI chapter 1.1.4 for a derivation).

An attempt to deliver an overview of the Stoffenmanager procedure concerning skin related effects is given with Fig. 35. Similarly to the construction of priority bands for inhalation effects (Table 11), corres­ponding tables (see Table 9 and 14 in the literature [74]) combine the *IT score* with *AEPEAK score* for local health effects, and with the *IE score* for systemic health effects (Fig. 35) in order to obtain health risk scores, their utilization having already been outlined in Table 15. Whereas the IT score is readily available if the substance is known, the AEPEAK score and the IE score result from several parameters (Fig. 35). They are more or less defined by physical data of substances (e.g. melting point), reaction temperature and further information from the user of the tool. However, as a first approach, default values can be assumed and exchanged in case a more detailed assessment is desired.

Fig. 35 Overview of the structure in the Stoffenmanager with regard to dermal effects. [74, 115-117] Separately, health risk scores are determined for local (a) and systemic (b) health effects considering modifiers (c) which take into account, e.g., volatility or temperature.

|  | AEDPEAK = actual exposure dose  AEPEAK = peak actual exposure  AER = actual exposure rate  AERPEAK = value of actual exposure rate of the hands  AT score = activity time  DC = direct contact  DEP = deposition | EBA = exposed body area  ED score = exposure dose score  ER score = exposure rate score  IE score = internal exposure  IT score = intrinsic toxicity  KP = permeability  Log POW = partition coefficient  MF = modifier factor | MG = modifier group  MT = total modifier value  MV = modifier value  MW = molecular weight  PER = default potential exposure score  RF = route weight fraction  SC = surface contact |
| --- | --- | --- | --- |

A compilation of the equations (10), (14), (15) and (16) can be found in this overview:

### Derivation of B^(ln(c)/ln(100)) (used in Table 14 and equation (14))

Commentary on the expression (used in Table 14 and equation (14)):

According to Table 13 the factor 100 lies between each band. In the sense of Table 12 and Table 14 this factor can easily be scaled down (or enlarged) to a factor ‘c’ by . This expression can be transformed, if desired, to :

### Derivation of ‘d’ from ‘b’ and ‘c’ (used in Table 15 and equation (17))

Derivation of ‘d’ from ‘b’ and ‘c’ (used in Table 15 and equation (17)):

The factor between the highest and lowest value in Table 12 and Table 14 is . Searching for an appropriate basis utilizing the lowest and highest health risk score, i.e. 1 and 10, the following equation has to be fulfilled: Transposing to ‘d’ delivers .

### Tables in the literature concerning the ‘Stoffenmanager’

Table 16 Handling scores for handling powders and granules (see Appendix A in the literature [109]). Reproduced from Occup. Environ. Med., J. Schinkel, W. Fransman, H. Heussen, H. Kromhout, H. Marquart, E. Tielemans, 67, 125-132, copyright (2010) with permission from BMJ Publishing Group Ltd.

Table 17 Handling scores for handling liquids (see Appendix C in the literature [109]). Reproduced from Occup. Environ. Med., J. Schinkel, W. Fransman, H. Heussen, H. Kromhout, H. Marquart, E. Tielemans, 67, 125-132, copyright (2010) with permission from BMJ Publishing Group Ltd.

# Supporting tables and figures…

## … regarding environmental issues

Table 18 Emission factors[60] of the industrial category (IC) ‘Chemical industry’: chemicals used in synthesis ‘production’[a]

| Compartment | Conditions Sol. (mg/l) | Vap. (Pa) |  | Emission factors | MC=1b | MC=1c | MC=3 |
| --- | --- | --- | --- | --- | --- | --- | --- |
|  | All MC’s |
| Air |  | 0 | <1 |  | 0 | 0 | 0.00001 |
|  |  | 1 | -10 |  | 0 | 0.00001 | 0.0001 |
|  |  | 10 | -100 |  | 0.00001 | 0.0001 | 0.001 |
|  |  | 100 | -1000 |  | 0.0001 | 0.001 | 0.01 |
|  |  | 1000 | -10000 |  | 0.001 | 0.005 | 0.05 |
|  |  | 10000 | < |  | 0.005 | 0.01 | 0.05 |
|  | T(t/a) |  |  |  |  |  |  |
| Wastewater |  | < | 1000 | 0.02 |  |  |  |
|  |  | >= | 1000 | 0.003 |  |  |  |
| Soil |  |  |  | 0.0001 |  |  |  |

[a]seeTable A1.1[60] for use category (UC) ≠ 33 (non-intermediates) in chapter 3 Appendix I, p. 205-250, in particular p. 224, i.e. p. 221. Other relevant tables which are not shown here are A 1.2 (for UC=33 (intermediates) in production), A 2.1 (formulation), and A 3.3 (industrial use). Main categories (MC, see Appendix I, p. 54 in chapter 3) describe the exposure relevance, e.g. whether the chemical is used in a closed system or is widely dispersed.

## … regarding the case study

Table 19 Data related to Fig.31. a) Health profile for the production of glutaraldehyde and oleuropein aglycon (OP-Agly), b) normalisation of a) to the highest value. The data were processed in the j_pac-2021-0326_suppl_007_Fig31_Stoffenmanager_BASF_Data.xls file (Supplementary material).

a) b)

| Production | Glutaraldehyde | OP-Agly |  | Glutaraldehyde | OP-Agly |
| --- | --- | --- | --- | --- | --- |
| Stoffenmanager[a] | 14.05[d] | 2.6[e] |  | 1 | 0.19 |
| BASF[b] | 6474.5[f] | 64270.4[f] |  | 0.10 | 1 |
| BASF[b][c] | 6474.5[f] | 4714.8[f] |  | 1 | 0.73 |

[a] Sum of health scores (Fig. 30), [b] Toxicity potential value (points), [c] without naphta

[d] j_pac-2021-0326_suppl_005_STOFFENMANAGER_MODIFICATION_example_glutaraldehyde.xlsx

(🡪 tab RESULT- )

[e] j_pac-2021-0326_suppl_006_STOFFENMANAGER_MODIFICATION_example_oleuropein_aglycon.xlsx

(🡪 summation in tab RESULT- )

[f] j_pac-2021-0326_suppl_002_BASF_score_Glutaraldehyde_OP-Agly.xlsx

(🡪 tab RESULT )


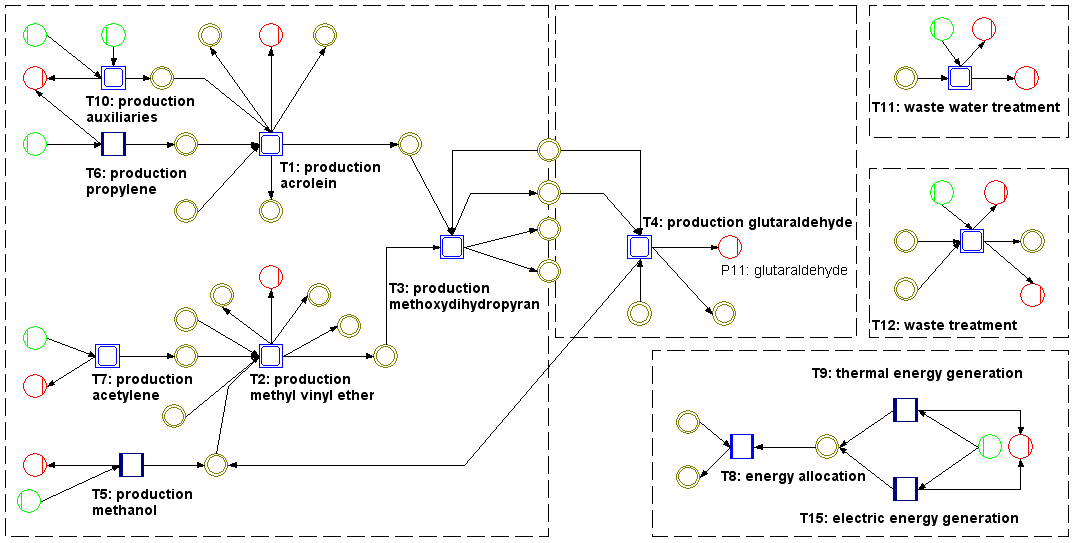


Fig. 36 Umberto [84]– model of the production of glutaraldehyde as basis for the determination of the material flows (ESI Fig. 37). [85] - Reproduced (adapted) by permission of John Wiley and Sons.


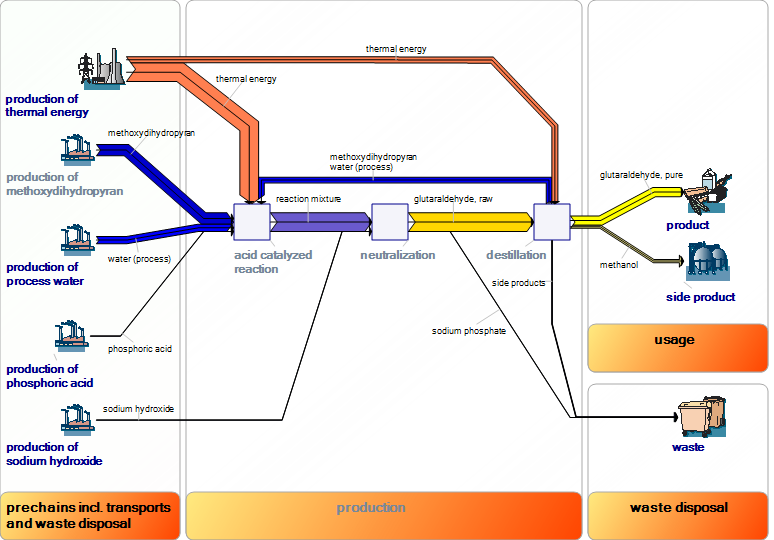


Fig. 37 Sankey diagram for the production of glutaraldehyde [85] - Reproduced (adapted) by permission of John Wiley and Sons.

Table 20 Life cycle assessment: environmental impacts related to the production of 1000 kg glutaraldehyde

a)

| Item (CML 2001) [86] | Quantity | Unit |
| --- | --- | --- |
| acidification potential (average European) | 5.95 | kg SO2-Eq |
| climate change (GWP 500a) | 1771.55 | kg CO2-Eq |
| eutrophication potential (average European) | 3.05 | kg NOx-Eq |
| freshwater aquatic ecotoxicity (FAETP 500a) | 81.78 | kg 1,4-DCB |
| freshwater sediment ecotoxicity (FSETP 500a) | 175.02 | kg 1,4-DCB |
| human toxicity (HTP 500a) | 220.73 | kg 1,4-DCB |
| ionising radiation | 0.00 | DALYs |
| land use (competition) | 16.73 | m2a |
| malodorous air | 13033579.11 | m3 air |
| marine aquatic ecotoxicity (MAETP 500a) | 2027.35 | kg 1,4-DCB |
| marine sediment ecotoxicity (MSETP 500a) | 1815.82 | kg 1,4-DCB |
| photochemical ox (summer smog, high NOx POCP) | 0.42 | kg ethylen |
| depletion of abiotic resources | 20.71 | kg antimon |
| stratospheric ozone depletion (ODP 25a) | 0.00 | kg CFC-11- |
| terrestrial ecotoxicity TAETP 500a | 0.71 | kg 1,4-DCB |

b)

| Item (CED) | Quantity | Unit |
| --- | --- | --- |
| biomass |  |  |
| renewable energy resources, biomass | 413,39 | MJ-Eq |
| fossil |  |  |
| non-renewable energy resources, fossil | 79.304,76 | MJ-Eq |
| geothermal |  |  |
| renewable energy resources, geothermal | 0,00 | MJ-Eq |
| nuclear |  |  |
| non-renewable energy resources, nuclear | 10.611,88 | MJ-Eq |
| primary forest |  |  |
| non-renewable energy resources, primary forest | 0,15 | MJ-Eq |
| solar |  |  |
| renewable energy resources, solar | 2,46 | MJ-Eq |
| water |  |  |
| renewable energy resources, pot barrage | 1.301,27 | MJ-Eq |
| wind |  |  |
| renewable energy resources, wind | 164,94 | MJ-Eq |
|  |  |  |
| Total | **91.798,85** | **MJ-Eq** |

Table 21 Default values for the determination of the health scores (Fig. 30)

| Room size | >1000 m3 |
| --- | --- |
| Ventilation | Mechanical/ natural ventilation |
| local controls | no control measures |
| cleaning | No daily cleaning |
| inspection | regular inspections |
| protection | None |
| imission reduction | no cabin |
| handling | closed containers |
| Duration input (min) | 5 |
| Duration process (min) | 30 |
| Duration output (min) | 5 |
| Exposure frequency | 4-5 days a week |
| unit time (min/h) | min |
| Mix? | n |
| Consideration of substances w/o R-phrase (0=ignore; 1= Hazard Group A) | 1 |
| Consideration of gases | 1 |
| room temperature (°C) | 20 |
| Task group | Immersion |
| wet/dry (if solids) | Like dry solids |
| Temperature above which liquids are "heated"/ freely in °C (if liquids) | 50 |
| Restricted workspace? | Restricted workspace |
| work level? | at or below waistlevel |
| amount | Normal |
| automation | fully automated |
| clothing | thick clothing |
| Exposed Body Area | <10 (size of a large coin, small splashes) |
