# Supplementary material for: Synthesis design using mass related metrics, environmental metrics, and health metrics
Source: publisher site journal article supplement (doi:10.1515/pac-2021-0326), 2022-02-01
Supplement: Supplementary file 2 [file pac-2021-0326_suppl_002_BASF_score_Glutaraldehyde_OP-Agly.xlsx]

## Sheet: RESULT
SUPPORTING INFORMATION related to Eissen M., "Synthesis design using mass related metrics, environmental metrics, and health metrics"
		Toxicity potential					Amount of production (kg)
		Production	Glutaraldehyde	OP-Agly	OP-Agly without naphta		Glutaraldehyde	OP-Agly
		Toxicity potential value (points)	6474.5	64270.4	4714.81		1	1
		Weighting factor (%)	30	30
		Metric of production	0.0302215	0.3
		Use
		Toxicity potential value (points)	550	0
		Weighting factor (%)	70	70
		Metric of use	0.7	0
		Total	1	0.410834

## Sheet: INPUT-Substances
Substance	R-phrases -->
propylene	12
oxygen	8
catalyst, metal oxyde
acrolein	11	24	25	26	34	40
acrylic acid	10	20	21	22	35	50
phosphoric acid	34
acetaldehyde	12	36	37	40
MDP	10	20	36
methane	12
methylvinylether	12
nitrogen
propane	12
water
sewage
byproducts
methanol	11	23	24	25	39
acetylene	12
acetic acid	10	35
carbon monoxide	12	23	48	61
carbon dioxide
dinitrogen monoxide	8
catalyst
emissions, air unspec.
potassium hydroxide	22	35
glutaraldehyde	23	25	34	42	43	50
sodium hydroxide	35
sodium phosphate	36	37	38
sodium	14	15	34
natural gas	12
air
hydrogen	12
sodium chloride
chlorine (Cl2)	23	36	37	38	50
apatite
sulfuric acid	35
sulfur dioxide	23	24
sulfur trioxide	14	34
sulfur	38
potassium chloride
potassium	14	15	34
olive leaves
olive leaves, dried
olive leaves, dried, ground
extract P0
extract P0, concentrated
enzyme	42
adsorber
ethanol	11
op-agly
naphta	45	46	65
ethylene	12	67
ethane	12
1,3-butadiene	12	45	46
butene	12

## Sheet: INPUT-production-OP-agly
Step	Name	In/Out	Substance	mass (kg)	upchain?
1	upstream: ethanol	input	naphta	201
1		output	hydrogen	4
1		output	methane	30.9
1		output	acetylene	0.8
1		output	propylene	32.4
1		output	propane	2.4
1		output	1,3-butadiene	8.6
1		output	butene	11.1
1		output	ethylene	57.7
2	upstream: ethanol 2	input	water	37.1
2		input	ethylene	57.7	y
2		output	ethanol	94.8
3	drying	input	olive leaves	400
3		output	olive leaves, dried	200
3		output	water	200
4	milling	input	olive leaves, dried	200	y
4		output	olive leaves, dried, ground	200
5	extraction	input	olive leaves, dried, ground	200	y
5		input	water	1800
5		output	olive leaves, dried, ground	200	y
5		output	water	1800	y
6	filtration	input	olive leaves, dried, ground	200	y
6		input	water	1800	y
6		output	extract P0	1550
6		output	olive leaves, dried, ground	200	y
6		output	water	250	y
7	concentrating	input	extract P0	1550	y
7		output	extract P0, concentrated	100
7		output	water	1450	y
8	biotransformation	input	extract P0, concentrated	100	y
8		input	enzyme	0.2
8		output	extract P0, concentrated	100	y
8		output	enzyme	0.2	y
9	denaturating	input	extract P0, concentrated	100	y
9		input	enzyme	0.2	y
9		output	extract P0, concentrated	100
10	adsorption	input	extract P0, concentrated	100	y
10		input	adsorber	30
10		output	extract P0, concentrated	100	y
10		output	adsorber	30	y
11	elution	input	extract P0, concentrated	100	y
11		input	adsorber	30	y
11		input	ethanol	94.8
11		output	adsorber	30	y
11		output	ethanol	94.8	y
12	vaporization	input	ethanol	94.8	y
12		output	ethanol	94.8	y
12		output	op-agly	2.7

## Sheet: INPUT-production-Glutaraldehyde
Step	Name	In/Out	Substance	mass (kg)
1	upstream: propylene	input	propane	10332043
1		input	oxygen	3748587
1		output	propylene	9858784
1		output	water	4221846
2	upstream: methanol	input	natural gas	2555399
2		input	oxygen	2549027
2		output	carbon monoxide	2549027
2		output	hydrogen	637256
3	upstream: methanol 2	input	carbon monoxide	2549027
3		input	hydrogen	637256
3		output	methanol	6805902
4	upstream: acetylene	input	natural gas	5374629
4		output	acetylene	4366886
4		output	hydrogen	1007742
5	upstream: sodium hydroxide	input	sodium chloride	128363
5		output	sodium	50472
5		output	chlorine (Cl2)	77861
6	upstream: sodium hydroxide 2	input	sodium	50472
6		input	water	39500
6		output	sodium hydroxide	87778
6		output	hydrogen	2194
7	upstream: phosphoric acid	input	sulfur	23409
7		input	air	23409
7		output	sulfur dioxide	46818
8	upstream: phosphoric acid 2	input	sulfur dioxide	46818
8		input	oxygen	11704
8		output	sulfur trioxide	58523
9	upstream: phosphoric acid 3	input	sulfur trioxide	58523
9		input	water	13167
9		output	sulfuric acid	71691
10	upstream: phosphoric acid 4	input	sulfuric acid	71691
10		input	apatite	363577
10		output	phosphoric acid	71691
10		output	byproducts	363577
11	upstream: potassium hydroxide	input	potassium chloride	1230975
11		output	potassium	644403
11		output	chlorine (Cl2)	586572
12	upstream: potassium hydroxide 2	input	potassium	644403
12		input	water	297416
12		output	potassium hydroxide	925296
12		output	hydrogen	16523
13	fixed-bed reactor	input	propylene	9858784
13		input	air	54279544
13		input	catalyst, metal oxyde	1
13		output	catalyst, metal oxyde	1
13		output	acrolein	10507240
13		output	sewage	67512057
13		output	acetic acid	140689
13		output	acrylic acid	1350616
14	quench	input	acrolein	10507240
14		input	sewage	67512057
14		input	acetic acid	140689
14		input	acrylic acid	1350616
14		output	acrolein	10507240
14		output	sewage	67512057
14		output	acetic acid	140689
14		output	acrylic acid	1350616
15	gas purification	input	acrolein	10507240
15		input	sewage	67512057
15		input	acetic acid	140689
15		input	acrylic acid	1350616
15		output	acrolein	10507240
15		output	sewage	67512057
15		output	acetic acid	140689
15		output	acrylic acid	1350616
16	adsorption	input	acrolein	10507240
16		input	water	42723665
16		output	carbon dioxide	1214802
16		output	carbon monoxide	1214802
16		output	nitrogen	41303282
16		output	oxygen	4859209
16		output	acrolein	10507240
17	combustion	input	carbon dioxide	1214802
17		input	carbon monoxide	1214802
17		input	nitrogen	41303282
17		input	oxygen	4859209
17		output	carbon dioxide	2429604
17		output	carbon monoxide	242
17		output	dinitrogen monoxide	24
17		output	oxygen	4859209
17		output	nitrogen	41303283
18	desorption	input	acrolein	10507240
18		input	water	42723665
18		output	acrolein	10507240
18		output	water	42723665
19	compressor	input	acetylene	4596722
19		input	methanol	6805902
19		input	nitrogen	4044037
19		output	acetylene	4596722
19		output	methanol	6805902
19		output	nitrogen	4044037
20	pressure reactor	input	acetylene	4596722
20		input	methanol	6805902
20		input	nitrogen	4044037
20		output	methylvinylether	9252969
20		output	catalyst	218344
20		output	emissions, air unspec.	3882275
20		output	acetylene	45967
20		output	nitrogen	4044037
20		output	methanol	1701475
21	condenser	input	methylvinylether	9252969
21		input	emissions, air unspec.	3882275
21		input	acetylene	45967
21		input	nitrogen	4044037
21		input	methanol	1701475
21		output	emissions, air unspec.	3882275
21		output	acetylen	45967
21		output	nitrogen	161761
21		output	methanol	1701475
21		output	methylvinylether	9252969
22	pressure de-aerator	input	methylvinylether	9252969
22		input	acetylene	45967
22		input	methanol	1701475
22		output	methylvinylether	9252969
22		output	acetylene	45967
22		output	methanol	1701475
23	column	input	methylvinylether	9252969
23		input	methanol	1701475
23		output	methylvinylether	9252969
23		output	methanol	1701475
24	destillation	input	methanol	1701475
24		input	methylvinylether	9252969
24		output	methanol	1701475
24		output	methylvinylether	9252969
25	washing column	input	methylvinylether	9252969
25		input	water	4626484
25		output	methylvinylether	9252969
25		output	water	1850593
25		output	water	2775890
26	drying	input	water	1850593
26		input	methylvinylether	9252969
26		input	potassium hydroxide	925296
26		output	water	1850593
26		output	methylvinylether	9252969
26		output	potassium hydroxide	925296
27	tubular reactor	input	methylvinylether	9252969
27		input	acrolein	10507240
27		output	methylvinylether	6168646
27		output	acrolein	1167471
27		output	MDP	18184123
28	processing MDP	input	methylvinylether	6168646
28		input	acrolein	1167471
28		input	MDP	18184123
28		output	methylvinylether	6168646
28		output	acrolein	1167471
28		output	MDP	18184123
29	reactor	input	MDP	18184123
29		input	phosphoric acid	71691
29		input	water	14338278
29		output	glutaraldehyde	15000000
29		output	MDP	181841
29		output	water	14338278
29		output	byproducts	898616
29		output	methanol	4800719
30	neutralization	input	glutaraldehyde	15000000
30		input	MDP	181841
30		input	water	14338278
30		input	byproducts	898616
30		input	methanol	4800719
30		input	sodium hydroxide	87778
30		output	glutaraldehyde	15000000
30		output	MDP	181841
30		output	water	14338278
30		output	byproducts	898616
30		output	methanol	4800719
30		output	sodium phosphate	119929
31	processing glutaraldehyde	input	glutaraldehyde	15000000
31		input	MDP	181841
31		input	water	11680765
31		input	byproducts	898616
31		input	methanol	4800719
31		output	MDP	181841
31		output	water	11680765
31		output	byproducts	898616
31		output	methanol	4800719
31		output	glutaraldehyde	15000000

## Sheet: production-OP-agly
Step	Name	In/Out	Substance	mass (kg)	Score
1	upstream: ethanol	input	naphta	201	800	160800
1		output	hydrogen	4	0	0
1		output	methane	30.9	0	0
1		output	acetylene	0.8	0	0
1		output	propylene	32.4	0	0
1		output	propane	2.4	0	0
1		output	1,3-butadiene	8.6	800	6880
1		output	butene	11.1	0	0
1		output	ethylene	57.7	100	5770
2	upstream: ethanol 2	input	water	37.1	0	0
2		input	ethylene	57.7	100
2		output	ethanol	94.8	0	0
3	drying	input	olive leaves	400	0	0
3		output	olive leaves, dried	200	0	0
3		output	water	200	0	0
4	milling	input	olive leaves, dried	200	0
4		output	olive leaves, dried, ground	200	0	0
5	extraction	input	olive leaves, dried, ground	200	0
5		input	water	1800	0	0
5		output	olive leaves, dried, ground	200	0
5		output	water	1800	0
6	filtration	input	olive leaves, dried, ground	200	0
6		input	water	1800	0
6		output	extract P0	1550	0	0
6		output	olive leaves, dried, ground	200	0
6		output	water	250	0
7	concentrating	input	extract P0	1550	0
7		output	extract P0, concentrated	100	0	0
7		output	water	1450	0
8	biotransformation	input	extract P0, concentrated	100	0
8		input	enzyme	0.2	400	80
8		output	extract P0, concentrated	100	0
8		output	enzyme	0.2	400
9	denaturating	input	extract P0, concentrated	100	0
9		input	enzyme	0.2	400
9		output	extract P0, concentrated	100	0	0
10	adsorption	input	extract P0, concentrated	100	0
10		input	adsorber	30	0	0
10		output	extract P0, concentrated	100	0
10		output	adsorber	30	0
11	elution	input	extract P0, concentrated	100	0
11		input	adsorber	30	0
11		input	ethanol	94.8	0	0
11		output	adsorber	30	0
11		output	ethanol	94.8	0
12	vaporization	input	ethanol	94.8	0
12		output	ethanol	94.8	0
12		output	op-agly	2.7	0	0
					#N/A
					#N/A
					#N/A
					#N/A
					#N/A
					#N/A
					#N/A
					#N/A
					#N/A
					#N/A
					#N/A
					#N/A
					#N/A
					#N/A
					#N/A
					#N/A
					#N/A
					#N/A
					#N/A
					#N/A
					#N/A
					#N/A
					#N/A
					#N/A
					#N/A
					#N/A
					#N/A
					#N/A
					#N/A
					#N/A
					#N/A
					#N/A
					#N/A
					#N/A
					#N/A
					#N/A
					#N/A
					#N/A
					#N/A
					#N/A
					#N/A
					#N/A
					#N/A
					#N/A
					#N/A
					#N/A
					#N/A
					#N/A
					#N/A
					#N/A
					#N/A
					#N/A
					#N/A
					#N/A
					#N/A
					#N/A
					#N/A
					#N/A
					#N/A
					#N/A
					#N/A
					#N/A
					#N/A
					#N/A
					#N/A
					#N/A
					#N/A
					#N/A
					#N/A
					#N/A
					#N/A
					#N/A
					#N/A
					#N/A
					#N/A
					#N/A
					#N/A
					#N/A
					#N/A
					#N/A
					#N/A
					#N/A
					#N/A
					#N/A
					#N/A
					#N/A
					#N/A
					#N/A
					#N/A
					#N/A
					#N/A
					#N/A
					#N/A
					#N/A
					#N/A
					#N/A
					#N/A
					#N/A
					#N/A
					#N/A
					#N/A
					#N/A
					#N/A
					#N/A
					#N/A
					#N/A
					#N/A
					#N/A
					#N/A
					#N/A
					#N/A
					#N/A
					#N/A
					#N/A
					#N/A
					#N/A
					#N/A
					#N/A
					#N/A
					#N/A
					#N/A
					#N/A
					#N/A
					#N/A
					#N/A
					#N/A
					#N/A
					#N/A
					#N/A
					#N/A
					#N/A
					#N/A
					#N/A
					#N/A
					#N/A
					#N/A
					#N/A
					#N/A
					#N/A
					#N/A
					#N/A
					#N/A
					#N/A
					#N/A
					#N/A
					#N/A
					#N/A
					#N/A
					#N/A
					#N/A
					#N/A
					#N/A
					#N/A
					#N/A
					#N/A
					#N/A
					#N/A
					#N/A
					#N/A
					#N/A
					#N/A
					#N/A
					#N/A
					#N/A
					#N/A
					#N/A
					#N/A
					#N/A
					#N/A
					#N/A
					#N/A
					#N/A
					#N/A
					#N/A
					#N/A
					#N/A
					#N/A
					#N/A
					#N/A
					#N/A
					#N/A
					#N/A
					#N/A
					#N/A
					#N/A
					#N/A
					#N/A
					#N/A
					#N/A
					#N/A
					#N/A
					#N/A
					#N/A
					#N/A
					#N/A
					#N/A
					#N/A
					#N/A
					#N/A
					#N/A
					#N/A
					#N/A
					#N/A
					#N/A
					#N/A
					#N/A
					#N/A
					#N/A
					#N/A
					#N/A
					#N/A
					#N/A
					#N/A
					#N/A
					#N/A
					#N/A
					#N/A
					#N/A
					#N/A
					#N/A
					#N/A
					#N/A
					#N/A
					#N/A
					#N/A
					#N/A
					#N/A
					#N/A
					#N/A
					#N/A
					#N/A
					#N/A
					#N/A
					#N/A
					#N/A
					#N/A
					#N/A
					#N/A
					#N/A
					#N/A
					#N/A
					#N/A
					#N/A
					#N/A
					#N/A
					#N/A
					#N/A
					#N/A
					#N/A
					#N/A

## Sheet: scores for substances
Substance	Scores for R-phrases -->										MAX
propylene	0										0
oxygen	0										0
catalyst, metal oxyde											0
acrolein	0	400	400	800	300	400					800
acrylic acid	0	0	100	100	300	0					300
phosphoric acid	300										300
acetaldehyde	0	100	300	400							400
MDP	0	0	100								100
methane	0										0
methylvinylether	0										0
nitrogen											0
propane	0										0
water											0
sewage											0
byproducts											0
methanol	0	550	400	400	550						550
acetylene	0										0
acetic acid	0	300									300
carbon monoxide	0	550	400	550							550
carbon dioxide											0
dinitrogen monoxide	0										0
catalyst											0
emissions, air unspec.											0
potassium hydroxide	100	300									300
glutaraldehyde	550	400	300	400	300	0					550
sodium hydroxide	300										300
sodium phosphate	100	300	100								300
sodium			300								300
natural gas	0										0
air											0
hydrogen	0										0
sodium chloride											0
chlorine (Cl2)	550	100	300	100	0						550
apatite											0
sulfuric acid	300										300
sulfur dioxide	550	400									550
sulfur trioxide		300									300
sulfur	100										100
potassium chloride											0
potassium			300								300
olive leaves											0
olive leaves, dried											0
olive leaves, dried, ground											0
extract P0											0
extract P0, concentrated											0
enzyme	400										400
adsorber											0
ethanol	0										0
op-agly											0
naphta	800	550	0								800
ethylene	0	100									100
ethane	0										0
1,3-butadiene	0	800	550								800
butene	0										0
0											0
0											0
0											0
0											0
0											0
0											0
0											0
0											0
0											0
0											0
0											0
0											0
0											0
0											0
0											0
0											0
0											0
0											0
0											0
0											0
0											0
0											0
0											0
0											0
0											0
0											0
0											0
0											0
0											0
0											0
0											0
0											0
0											0
0											0
0											0
0											0
0											0
0											0
0											0
0											0
0											0
0											0
0											0
0											0

## Sheet: production-glutaraldehyde
Step	Name	In/Out	Substance	mass (kg)	score	upchain?	mass*score
1	upstream: propylene	input	propane	10332043	0	0	0
1		input	oxygen	3748587	0	0	0
1		output	propylene	9858784	0	0	0
1		output	water	4221846	0	0	0
2	upstream: methanol	input	natural gas	2555399	0	0	0
2		input	oxygen	2549027	0	0	0
2		output	carbon monoxide	2549027	550	0	1401964850
2		output	hydrogen	637256	0	0	0
3	upstream: methanol 2	input	carbon monoxide	2549027	550	1
3		input	hydrogen	637256	0	1
3		output	methanol	6805902	550	0	3743246100
4	upstream: acetylene	input	natural gas	5374629	0	0	0
4		output	acetylene	4366886	0	0	0
4		output	hydrogen	1007742	0	0	0
5	upstream: sodium hydroxide	input	sodium chloride	128363	0	0	0
5		output	sodium	50472	300	0	15141600
5		output	chlorine (Cl2)	77861	550	0	42823550
6	upstream: sodium hydroxide 2	input	sodium	50472	300	1
6		input	water	39500	0	0	0
6		output	sodium hydroxide	87778	300	0	26333400
6		output	hydrogen	2194	0	0	0
7	upstream: phosphoric acid	input	sulfur	23409	100	0	2340900
7		input	air	23409	0	0	0
7		output	sulfur dioxide	46818	550	0	25749900
8	upstream: phosphoric acid 2	input	sulfur dioxide	46818	550	1
8		input	oxygen	11704	0	0	0
8		output	sulfur trioxide	58523	300	0	17556900
9	upstream: phosphoric acid 3	input	sulfur trioxide	58523	300	1
9		input	water	13167	0	0	0
9		output	sulfuric acid	71691	300	0	21507300
10	upstream: phosphoric acid 4	input	sulfuric acid	71691	300	1
10		input	apatite	363577	0	0	0
10		output	phosphoric acid	71691	300	0	21507300
10		output	byproducts	363577	0	0	0
11	upstream: potassium hydroxide	input	potassium chloride	1230975	0	0	0
11		output	potassium	644403	300	0	193320900
11		output	chlorine (Cl2)	586572	550	0	322614600
12	upstream: potassium hydroxide 2	input	potassium	644403	300	1
12		input	water	297416	0	0	0
12		output	potassium hydroxide	925296	300	0	277588800
12		output	hydrogen	16523	0	0	0
13	fixed-bed reactor	input	propylene	9858784	0	1
13		input	air	54279544	0	0	0
13		input	catalyst, metal oxyde	1	0	1
13		output	catalyst, metal oxyde	1	0	0	0
13		output	acrolein	10507240	800	0	8405792000
13		output	sewage	67512057	0	0	0
13		output	acetic acid	140689	300	0	42206700
13		output	acrylic acid	1350616	300	0	405184800
14	quench	input	acrolein	10507240	800	5
14		input	sewage	67512057	0	3
14		input	acetic acid	140689	300	3
14		input	acrylic acid	1350616	300	3
14		output	acrolein	10507240	800	0	8405792000
14		output	sewage	67512057	0	0	0
14		output	acetic acid	140689	300	0	42206700
14		output	acrylic acid	1350616	300	0	405184800
15	gas purification	input	acrolein	10507240	800	5
15		input	sewage	67512057	0	3
15		input	acetic acid	140689	300	3
15		input	acrylic acid	1350616	300	3
15		output	acrolein	10507240	800	0	8405792000
15		output	sewage	67512057	0	0	0
15		output	acetic acid	140689	300	0	42206700
15		output	acrylic acid	1350616	300	0	405184800
16	adsorption	input	acrolein	10507240	800	5
16		input	water	42723665	0	1
16		output	carbon dioxide	1214802	0	0	0
16		output	carbon monoxide	1214802	550	0	668141100
16		output	nitrogen	41303282	0	0	0
16		output	oxygen	4859209	0	0	0
16		output	acrolein	10507240	800	0	8405792000
17	combustion	input	carbon dioxide	1214802	0	1
17		input	carbon monoxide	1214802	550	1
17		input	nitrogen	41303282	0	1
17		input	oxygen	4859209	0	2
17		output	carbon dioxide	2429604	0	0	0
17		output	carbon monoxide	242	550	0	133100
17		output	dinitrogen monoxide	24	0	0	0
17		output	oxygen	4859209	0	0	0
17		output	nitrogen	41303283	0	0	0
18	desorption	input	acrolein	10507240	800	5
18		input	water	42723665	0	1
18		output	acrolein	10507240	800	0	8405792000
18		output	water	42723665	0	0	0
19	compressor	input	acetylene	4596722	0	1
19		input	methanol	6805902	550	2
19		input	nitrogen	4044037	0	2
19		output	acetylene	4596722	0	0	0
19		output	methanol	6805902	550	0	3743246100
19		output	nitrogen	4044037	0	0	0
20	pressure reactor	input	acetylene	4596722	0	1
20		input	methanol	6805902	550	2
20		input	nitrogen	4044037	0	2
20		output	methylvinylether	9252969	0	0	0
20		output	catalyst	218344	0	0	0
20		output	emissions, air unspec.	3882275	0	0	0
20		output	acetylene	45967	0	0	0
20		output	nitrogen	4044037	0	0	0
20		output	methanol	1701475	550	0	935811250
21	condenser	input	methylvinylether	9252969	0	7
21		input	emissions, air unspec.	3882275	0	2
21		input	acetylene	45967	0	2
21		input	nitrogen	4044037	0	2
21		input	methanol	1701475	550	5
21		output	emissions, air unspec.	3882275	0	0	0
21		output	acetylen	45967	#N/A	0
21		output	nitrogen	161761	0	0	0
21		output	methanol	1701475	550	0	935811250
21		output	methylvinylether	9252969	0	0	0
22	pressure de-aerator	input	methylvinylether	9252969	0	7
22		input	acetylene	45967	0	2
22		input	methanol	1701475	550	5
22		output	methylvinylether	9252969	0	0	0
22		output	acetylene	45967	0	0	0
22		output	methanol	1701475	550	0	935811250
23	column	input	methylvinylether	9252969	0	7
23		input	methanol	1701475	550	5
23		output	methylvinylether	9252969	0	0	0
23		output	methanol	1701475	550	0	935811250
24	destillation	input	methanol	1701475	550	5
24		input	methylvinylether	9252969	0	7
24		output	methanol	1701475	550	0	935811250
24		output	methylvinylether	9252969	0	0	0
25	washing column	input	methylvinylether	9252969	0	7
25		input	water	4626484	0	0	0
25		output	methylvinylether	9252969	0	0	0
25		output	water	1850593	0	0	0
25		output	water	2775890	0	0	0
26	drying	input	water	1850593	0	2
26		input	methylvinylether	9252969	0	7
26		input	potassium hydroxide	925296	300	2
26		output	water	1850593	0	0	0
26		output	methylvinylether	9252969	0	0	0
26		output	potassium hydroxide	925296	300	0	277588800
27	tubular reactor	input	methylvinylether	9252969	0	7
27		input	acrolein	10507240	800	5
27		output	methylvinylether	6168646	0	0	0
27		output	acrolein	1167471	800	0	933976800
27		output	MDP	18184123	100	0	1818412300
28	processing MDP	input	methylvinylether	6168646	0	2
28		input	acrolein	1167471	800	2
28		input	MDP	18184123	100	2
28		output	methylvinylether	6168646	0	0	0
28		output	acrolein	1167471	800	0	933976800
28		output	MDP	18184123	100	0	1818412300
29	reactor	input	MDP	18184123	100	2
29		input	phosphoric acid	71691	300	1
29		input	water	14338278	0	2
29		output	glutaraldehyde	15000000	550	0	8250000000
29		output	MDP	181841	100	0	18184100
29		output	water	14338278	0	0	0
29		output	byproducts	898616	0	0	0
29		output	methanol	4800719	550	0	2640395450
30	neutralization	input	glutaraldehyde	15000000	550	3
30		input	MDP	181841	100	3
30		input	water	14338278	0	2
30		input	byproducts	898616	0	3
30		input	methanol	4800719	550	3
30		input	sodium hydroxide	87778	300	1
30		output	glutaraldehyde	15000000	550	0	8250000000
30		output	MDP	181841	100	0	18184100
30		output	water	14338278	0	0	0
30		output	byproducts	898616	0	0	0
30		output	methanol	4800719	550	0	2640395450
30		output	sodium phosphate	119929	300	0	35978700
31	processing glutaraldehyde	input	glutaraldehyde	15000000	550	3
31		input	MDP	181841	100	3
31		input	water	11680765	0	1
31		input	byproducts	898616	0	3
31		input	methanol	4800719	550	3
31		output	MDP	181841	100	0	18184100
31		output	water	11680765	0	0	0
31		output	byproducts	898616	0	0	0
31		output	methanol	4800719	550	0	2640395450
31		output	glutaraldehyde	15000000	550	0	8250000000
					#N/A	0
					#N/A	0
					#N/A	0
					#N/A	0
					#N/A	0
					#N/A	0
					#N/A	0
					#N/A	0
					#N/A	0
					#N/A	0
					#N/A	0
					#N/A	0
					#N/A	0
					#N/A	0
					#N/A	0
					#N/A	0
					#N/A	0
					#N/A	0
					#N/A	0
					#N/A	0
					#N/A	0
					#N/A	0
					#N/A	0
					#N/A	0
					#N/A	0
					#N/A	0
					#N/A	0
					#N/A	0
					#N/A	0
					#N/A	0
					#N/A	0
					#N/A	0
					#N/A	0
					#N/A	0
					#N/A	0
					#N/A	0
					#N/A	0
					#N/A	0
					#N/A	0
					#N/A	0
					#N/A	0
					#N/A	0
					#N/A	0
					#N/A	0
					#N/A	0
					#N/A	0
					#N/A	0
					#N/A	0
					#N/A	0
					#N/A	0
					#N/A	0
					#N/A	0
					#N/A	0
					#N/A	0
					#N/A	0
					#N/A	0
					#N/A	0
					#N/A	0
					#N/A	0
					#N/A	0
					#N/A	0
					#N/A	0
					#N/A	0
					#N/A	0
					#N/A	0
					#N/A	0
					#N/A	0
					#N/A	0
					#N/A	0
					#N/A	0
					#N/A	0
					#N/A	0
					#N/A	0
					#N/A	0
					#N/A	0
					#N/A	0
					#N/A	0
					#N/A	0
					#N/A	0
					#N/A	0
					#N/A	0
					#N/A	0
					#N/A	0
					#N/A	0
					#N/A	0
					#N/A	0
					#N/A	0
					#N/A	0
					#N/A	0
					#N/A	0
					#N/A	0
					#N/A	0
					#N/A	0
					#N/A	0
					#N/A	0
					#N/A	0
					#N/A	0
					#N/A	0
					#N/A	0
					#N/A	0
					#N/A	0
					#N/A	0
					#N/A	0
					#N/A	0
					#N/A	0
					#N/A	0
					#N/A	0
					#N/A	0
					#N/A	0
					#N/A	0
					#N/A	0
					#N/A	0
					#N/A	0
					#N/A	0
					#N/A	0
					#N/A	0
					#N/A	0
					#N/A	0
					#N/A	0
					#N/A	0
					#N/A	0
					#N/A	0

## Sheet: substances-->scores
Substance	Scores for R-phrases -->										MAX
propylene	0										0
oxygen	0										0
catalyst, metal oxyde											0
acrolein	0	400	400	800	300	400					800
acrylic acid	0	0	100	100	300	0					300
phosphoric acid	300										300
acetaldehyde	0	100	300	400							400
MDP	0	0	100								100
methane	0										0
methylvinylether	0										0
nitrogen											0
propane	0										0
water											0
sewage											0
byproducts											0
methanol	0	550	400	400	550						550
acetylene	0										0
acetic acid	0	300									300
carbon monoxide	0	550	400	550							550
carbon dioxide											0
dinitrogen monoxide	0										0
catalyst											0
emissions, air unspec.											0
potassium hydroxide	100	300									300
glutaraldehyde	550	400	300	400	300	0					550
sodium hydroxide	300										300
sodium phosphate	100	300	100								300
sodium			300								300
natural gas	0										0
air											0
hydrogen	0										0
sodium chloride											0
chlorine (Cl2)	550	100	300	100	0						550
apatite											0
sulfuric acid	300										300
sulfur dioxide	550	400									550
sulfur trioxide		300									300
sulfur	100										100
potassium chloride											0
potassium			300								300
olive leaves											0
olive leaves, dried											0
olive leaves, dried, ground											0
extract P0											0
extract P0, concentrated											0
enzyme	400										400
adsorber											0
ethanol	0										0
op-agly											0
naphta	800	550	0								800
ethylene	0	100									100
ethane	0										0
1,3-butadiene	0	800	550								800
butene	0										0
0											0
0											0
0											0
0											0
0											0
0											0
0											0
0											0
0											0
0											0
0											0
0											0
0											0
0											0
0											0
0											0
0											0
0											0
0											0
0											0
0											0
0											0
0											0
0											0
0											0
0											0
0											0
0											0
0											0
0											0
0											0
0											0
0											0
0											0
0											0
0											0
0											0
0											0
0											0
0											0
0											0
0											0
0											0
0											0

## Sheet: R-phrases-->scores
R-Satz No.	Score	Score from Table 5 (R. Landsiedel, P. Saling. Int. J. LCA. 7, 261-8 (2002))
20
21	100
22	100
23	550
24	400
25	400
26	800
27	400
28	400
33	550
34	300
35	300
36	100
37	300
38	100
39	550
40	400
41	300
42	400
43	300
45	800
46	550
48	400	Assignment to two groups! (group 3 und 4)
49
60	550
61	550
62
63	400
64	400
65
66	100
67	100
68
5
6
8
10
11
12
13
50
