# Supplementary material for: Synthesis design using mass related metrics, environmental metrics, and health metrics
Source: publisher site journal article supplement (doi:10.1515/pac-2021-0326), 2022-02-01
Supplement: Supplementary file 3 [file pac-2021-0326_suppl_003_DART_example.xls]

## Sheet: DART Method (Excerpt)
SUPPORTING INFORMATION related to Eissen M., "Synthesis design using mass related metrics, environmental metrics, and health metrics"
	Considered reference:
	[1] M. Pavan, A. Worth, A set of case studies to illustrate the applicability of DART (Decision Analysis by Ranking Techniques) in the ranking of chemicals, European Commission Joint Research Center, Institute for Health and Consumer Protection, Luxembourg, 2008, https://ec.europa.eu/jrc/en/scientific-tool/dart-decision-analysis-ranking-techniques (last accessed: 21/03/2021)
	Conversion of P, B and T predictions in different levels of concern
	Persistence	BCF	Toxicity	Concern Score						Exponential function:
	non linear model < 0.5 or (MITI non-linear model < 0.5 and Ultimate biodegradation < 2.2)	2000<BCF	LC50≤1	4						0.1	0.5	1	2
	2.2 ≤ Ultimate biodegradation < 3	1500<BCF≤2000	1<LC50≤10	3
	3 ≤ Ultimate biodegradation < 3.5	1000<BCF≤1500	10<LC50≤100	2					concern scores	k = 0,1	k = 0,5	k = 1	k = 2
	3.5 ≤ Ultimate biodegradation	BCF≤1000	100<LC50	1					1	1	1	1	1
						Linear function:			2	0.69939	0.813676	0.909969	0.984124
	Minimum	1	is set to	1		1	1		3	0.367165	0.50648	0.665241	0.866813
	Maximum	4	is set to	0		4	0		4	0	0	0	0
	m in f=mx+b	-0.333333
	b in f=mx+b	1.33333
	linear function:	f(x) = -0,33333*x + 1,33333333333333
	i.e.	f(4) = 0 and f(1) = 1			according to Figure 4 p. 20 of [1]										a)					b)
															Inverse relationship between the ranking score its desirability (or utility). a) linear function and b) exponential functions
										Enter another k-value in order to change the relevance of score 2 and score 3 on the overall desirability and utility function (compare the Figure b)).
										k =	1
	Determination of PBT hazard scores – some examples, considering a …
				a) linear function						b) exponential function
	concern scores			desirability (or utility)			PBT hazard score			desirability (or utility)			PBT hazard score				weighting
	P	B	T	P	B	T	utility	desirabilty		P	B	T	utility	desirabilty			w(Persistence)	w(BCF)	w(Tox)
Substance 1	1	1	1	1	1	1	0	0		1	1	1	0	0			0.333333	0.333333	0.333333
Substance 2	1	2	3	1	0.666667	0.333333	0.333333	0.394293		1	0.909969	0.665241	0.141597	0.154068			0.333333	0.333333	0.333333
Substance 3	2	2	3	0.666667	0.666667	0.333333	0.444444	0.470866		0.909969	0.909969	0.665241	0.171607	0.180257			0.333333	0.333333	0.333333
Substance 4	1	1	4	1	1	0	0.333333	1		1	1	0	0.333333	1			0.333333	0.333333	0.333333
Substance 5	1	2	4	1	0.666667	0	0.444444	1		1	0.909969	0	0.363344	1			0.333333	0.333333	0.333333
Substance 6	1	4	4	1	0	0	0.666667	1		1	0	0	0.666667	1			0.333333	0.333333	0.333333
Substance 7	4	4	4	0	0	0	1	1		0	0	0	1	1			0.333333	0.333333	0.333333
							with eq.(1) on p. 12 of [1]	with eq.(2) on p. 12 of [1]
Enter concern scores for a substance in order to determine the PBT hazard score.
(The concern scores result from the consideration of the upper table "Conversion of P, B ….". EPA software tools (cited in [1]) deliver data when entering the SMILES code of a substance.)
