# Supplementary material for: Synthesis design using mass related metrics, environmental metrics, and health metrics
Source: publisher site journal article supplement (doi:10.1515/pac-2021-0326), 2022-02-01
Supplement: Supplementary file 4 [file pac-2021-0326_suppl_004_STOFFENMANAGER_MODIFICATION_construction_of_health_scores.xls]

## Sheet: Inhalation & Skin
SUPPORTING INFORMATION related to Eissen M., "Synthesis design using mass related metrics, environmental metrics, and health metrics"
		Inhalation
			Transformation of hazard band and exposure band into health scores.
Click on the scroll bars in order to change the factor between hazard bands and exposure bands.
20		Basis for hazard bands=	2	Hazard band:	A	B	C	D	E
20		Basis for exposure bands=	2	Hazard band as number (h):	1	2	3	4	5
				b^h:	2	4	8	16	32
				Weighting factor for hazard (WH):	0.0625	0.125	0.25	0.5	1
	Exposure band↓:	Maximum exposure score	Modified maximum exposure score	Weighting factor for exposure (WE) ↓:
	1	2e-05	0.196216	0.125	0.0078125	0.015625	0.03125	0.0625	0.125
	2	0.002	0.392432	0.25	0.015625	0.03125	0.0625	0.125	0.25
	3	0.2	0.784864	0.5	0.03125	0.0625	0.125	0.25	0.5
	4	20	1.56973	1	0.0625	0.125	0.25	0.5	1
				Comment: The highest health index is 1 for both 'Inhalation' and 'Skin'. The lowest value for both is 0,0078125.
		Skin
				Health risk scores = hrs :	1	2	3	4	5	6	7	8	9	10
					1.71449	2.93947	5.03968	8.64048	14.814	25.3984	43.5453	74.6579	128	219.454
	d=	1.71449		Health index:	0.0078125	0.0133944	0.0229646	0.0393725	0.0675037	0.115734	0.198425	0.340198	0.583265	1
