# Supplementary material for: Synthesis design using mass related metrics, environmental metrics, and health metrics
Source: publisher site journal article supplement (doi:10.1515/pac-2021-0326), 2022-02-01
Supplement: Supplementary file 5 [file pac-2021-0326_suppl_005_STOFFENMANAGER_MODIFICATION_example_glutaraldehyde.xlsx]

## Sheet: START
SUPPORTING INFORMATION related to Eissen M., "Synthesis design using mass related metrics, environmental metrics, and health metrics"
		Instructions
	Literature
	No.	quoted as
	1	F09	W. Fransman, J. W. Cherrie, M. van Tongeren, T. Schneider, M. Tischer, J. Schinkel, H. Marquart, N. Warren, H. Kromhout, E. Tielemans, TNO report - V8667 - Development of a mechanistic model for the Advanced REACH Tool (ART) - Beta release (September 2009) -, 2009, p. 270.
	2	H09	H. a. S. Executive, The technical basis for COSHH essentials: Easy steps to control chemicals, 2009, http://www.coshh-essentials.org.uk/assets/live/CETB.pdf.
	3	M08	H. Marquart, H. Heussen, M. Le Feber, D. Noy, E. Tielemans, J. Schinkel, J. West, D. Van der Schaaf, 'Stoffenmanager', a web-based control banding tool using an exposure process model, Ann. Occup. Hyg. 2008, 52, 6, 429-441, <Go to ISI>://000258329800003.
	4	O03	R. Oppl, F. Kalberlah, P. G. Evans, J. J. Van Hemmen, A toolkit for dermal risk assessment and management: An overview, Ann. Occup. Hyg. 2003, 47, 8, 629-640, <Go to ISI>://000186748400006.
	5	G03	H. A. Goede, S. Tijssen, H. J. Schipper, N. Warren, R. Oppl, F. Kalberlah, J. J. Van Hemmen, Classification of dermal exposure modifiers and assignment of values for a risk assessment toolkit, Annals of Occupational Hygiene 2003, 47, 8, 609-618, <Go to ISI>://000186748400004.
	6	W03	N. Warren, H. A. Goede, S. Tijssen, R. Oppl, H. J. Schipper, J. J. Van Hemmen, Deriving default dermal exposure values for use in a risk assessment toolkit for small and medium-sized enterprises, Annals of Occupational Hygiene 2003, 47, 8, 619-627, <Go to ISI>://000186748400005.
	7	SW03	U. Schuhmacher-Wolz, F. Kalberlah, R. Oppl, J. J. Van Hemmen, A toolkit for dermal risk assessment: Toxicological approach for hazard characterization, Ann. Occup. Hyg. 2003, 47, 8, 641-652, <Go to ISI>://000186748400007.
	8	S08	J. Schinkel, W. Fransman, H. Heussen, H. Kromhout, H. Marquart, E. Tielemans, Cross-validation and refinement of the Stoffenmanager as a first tier exposure assessment tool for REACH, Occup. Environ. Med. 2010, 67, 125-132, http://oem.bmj.com/cgi/content/abstract/oem.2008.045500v1.
	9	T08	E. Tielemans, D. Noy, J. Schinkel, H. Heussen, D. Van der Schaaf, J. West, W. Fransman, Stoffenmanager exposure model: Development of a quantitative algorithm, Annals of Occupational Hygiene 2008, 52, 6, 443-454, <Go to ISI>://000258329800004.
		Comment: All table references within "[[[]]]", e.g. "[[[Table 8]]]" have internal meaning and should be ignored.

## Sheet: INPUT-Settings
	Basis for hazard bands		b	2				hazard band
	Factor between exposure bands		c	2		exposure band		A/1	B/2	C/3	D/4	E/5
							1	0.0078125	0.015625	0.03125	0.0625	0.125
							2	0.015625	0.03125	0.0625	0.125	0.25
							3	0.03125	0.0625	0.125	0.25	0.5
	Default-values						4	0.0625	0.125	0.25	0.5	1
	Room size	>1000 m3
	Ventilation	Mechanical/ natural ventilation
	local controls	no control measures
	cleaning	No daily cleaning
	inspection	regular inspections
	protection	None
	imission reduction	no cabin
	handling	closed containers
	Duration input (min)	5
	Duration process (min)	30
	Duration output (min)	5
	Exposure frequency	4-5 days a week
	unit time (min/h)	min
	Mix?	n
	Consideration of substances w/o R-phrase (0=ignore; 1= Hazard Group A)	1
	Consideration of gases	1
	room temperature (°C)	20
	Default values
	Task group	Immersion
IF solid	wet/dry	Like dry solids
IF liquid	Temperature above which liquids are "heated"/ freely in °C	50
	Restricted workspace?	Restricted workspace
	work level?	at or below waistlevel
	amount	Normal
	automation	fully automated
	clothing	thick clothing
	Exposed Body Area	<10 (size of a large coin, small splashes)

## Sheet: INPUT-Substances
	aggregate state	(Do NOT enter data here: determined from boiling and melting point)	((only necessary, if substance is liquid sometime in the process))		((only necessary, if substance is solid sometime in the process))
Substance	at room temperature	(at 20°C)	Boiling Point (°C)	Volatility	texture	Melting Point (°C)	R-phrases -->										corrosive (pH<2/>11,5)	mol weight	log Kow
propylene	gas	gas	-47.7			-185.3	12											42.08
oxygen	gas					-218.3	8											32
catalyst, metal oxyde	solid	solid			Granules or flakes	1500												70
acrolein	liquid		52	like water			11	24	25	26	34	40
acrylic acid	liquid		141	like water			10	20	21	22	35	50
phosphoric acid	liquid		213	like oil/grease			34											98
acetaldehyde	liquid	liquid	20.4	like solvent		-123	12	36	37	40								44.1
MDP	liquid		127.1	like oil/grease			10	20	36									114.15
methane	gas						12											16.04
methylvinylether	gas						12											58.08
nitrogen	gas																	14.0067
propane	gas	gas	-42			-188	12											44.01
water	liquid		100	like water														18.02
sewage	liquid		100	like water														18.02
inert gas	gas
byproducts	liquid		100	like water
methanol	liquid	liquid	65	like solvent		-98	11	23	24	25	39							32.04
acetylene	gas						12											26.04
acetic acid	liquid		118	like water			10	35
carbon monoxide	gas						12	23	48	61								28.01
carbon dioxide	gas																	44.01
dinitrogen monoxide	gas						8											44.01
catalyst	solid
emissions, air unspec.	gas
potassium hydroxide	solid	solid			Coarse Dust	360	22	35										56.11
glutaraldehyde	liquid	liquid	188	like oil/grease		-6	23	25	34	42	43	50
sodium hydroxide	solid	solid			Firm granules or flakes	322	35											40
sodium phosphate	solid	solid			Granules or flakes	75	36	37	38
sodium	solid	solid			Fine dust	97.72	14	15	34									22.98
natural gas	gas						12											16.04
air	gas
hydrogen	gas						12											2
sodium chloride	solid	solid			Firm granules or flakes	801												58.443
chlorine (Cl2)	gas						23	36	37	38	50							70.9
apatite	solid	solid			Solid objects	1000												497.413
sulfuric acid	liquid		337	like solvent			35											98.08
sulfur dioxide	gas						23	24										64.06
sulfur trioxide	solid	solid			Extremely dusty products	62.2	14	34										80.06
sulfur	solid	solid	444.72	like oil/grease	Firm granules or flakes	115.21	38											32.065
potassium chloride	solid	solid			Coarse Dust	770												74.55
potassium	solid	solid			Coarse Dust	63.38	14	15	34									39.0983

## Sheet: INPUT-Production
							exposure duration		frequency
Step	Name	In/Out	Substance	mass (kg)	temperature (°C)	Mix?	min/h	value		Handling	imission reduction	protection	inspection	cleaning	local controls	Room size	Ventilation
1	upstream: propylene	input	propane	10332043
1		input	oxygen	3748587
1		process	propane	10332043	400	y
1		process	oxygen	3748587	400	y
1		output	propylene	9858784
1		output	water	4221846
2	upstream: methanol	input	natural gas	2555399
2		input	oxygen	2549027
2		process	carbon monoxide	2549027	900	y	min	5
2		process	hydrogen	637256	900	y	min	5
2		output	carbon monoxide	2549027
2		output	hydrogen	637256
3	upstream: methanol 2	input	carbon monoxide	2549027
3		input	hydrogen	637256
3		process	carbon monoxide	2549027	250	y
3		process	hydrogen	637256	250	y
3		output	methanol	6805902
4	upstream: acetylene	input	natural gas	5374629
4		process	natural gas	5374629	2000		min	5
4		output	acetylene	4366886	200
4		output	hydrogen	1007742	200
5	upstream: sodium hydroxide	input	sodium chloride	128363
5		process	sodium chloride	128363	620
5		output	sodium	50472
5		output	chlorine (Cl2)	77861
6	upstream: sodium hydroxide 2	input	sodium	50472
6		input	water	39500
6		process	sodium	50472
6		process	water	39500
6		output	sodium hydroxide	87778
6		output	hydrogen	2194
7	upstream: phosphoric acid	input	sulfur	23409
7		input	air	23409
7		process	sulfur	23409	1800
7		process	air	23409	1800
7		output	sulfur dioxide	46818
8	upstream: phosphoric acid 2	input	sulfur dioxide	46818
8		input	oxygen	11704
8		process	sulfur dioxide	46818	500	y
8		process	oxygen	11704	500	y
8		output	sulfur trioxide	58523
9	upstream: phosphoric acid 3	input	sulfur trioxide	58523
9		input	water	13167
9		process	sulfur trioxide	58523
9		process	water	13167
9		output	sulfuric acid	71691
10	upstream: phosphoric acid 4	input	sulfuric acid	71691
10		input	apatite	363577
10		process	sulfuric acid	71691
10		process	apatite	363577
10		output	phosphoric acid	71691
10		output	byproducts	363577
11	upstream: potassium hydroxide	input	potassium chloride	1230975
11		process	potassium chloride	1230975
11		output	potassium	644403
11		output	chlorine (Cl2)	586572
12	upstream: potassium hydroxide 2	input	potassium	644403
12		input	water	297416
12		process	potassium	644403
12		process	water	297416
12		output	potassium hydroxide	925296
12		output	hydrogen	16523
13	fixed-bed reactor	input	propylene	9858784
13		input	air	54279544
13		input	catalyst, metal oxyde	1
13		process	catalyst, metal oxyde	1	350	y
13		process	acrolein	10507240	350	y
13		process	sewage	67512057	350	y
13		process	acetic acid	140689	350	y
13		process	acrylic acid	1350616	350	y
13		output	catalyst, metal oxyde	1	350	y
13		output	acrolein	10507240	350	y
13		output	sewage	67512057	350	y
13		output	acetic acid	140689	350	y
13		output	acrylic acid	1350616	350	y
14	quench	input	acrolein	10507240	350	y
14		input	sewage	67512057	350	y
14		input	acetic acid	140689	350	y
14		input	acrylic acid	1350616	350	y
14		process	acrolein	10507240	250	y
14		process	sewage	67512057	250	y
14		process	acetic acid	140689	250	y
14		process	acrylic acid	1350616	250	y
14		output	acrolein	10507240	70	y
14		output	sewage	67512057	70	y
14		output	acetic acid	140689	70	y
14		output	acrylic acid	1350616	70	y
15	gas purification	input	acrolein	10507240	70	y
15		input	sewage	67512057	70	y
15		input	acetic acid	140689	70	y
15		input	acrylic acid	1350616	70	y
15		process	acrolein	10507240	70	y
15		process	sewage	67512057	70	y
15		process	acetic acid	140689	70	y
15		process	acrylic acid	1350616	70	y
15		output	acrolein	10507240	70	n
15		output	sewage	67512057	70	y
15		output	acetic acid	140689	70	y
15		output	acrylic acid	1350616	70	y
16	adsorption	input	acrolein	10507240	15
16		input	water	42723665	15
16		process	acrolein	10507240	15	y
16		process	water	42723665	15	y
16		output	carbon dioxide	1214802	15	y
16		output	carbon monoxide	1214802	15	y
16		output	nitrogen	41303282	15	y
16		output	oxygen	4859209	15	y
16		output	acrolein	10507240	15
17	combustion	input	carbon dioxide	1214802
17		input	carbon monoxide	1214802
17		input	nitrogen	41303282
17		input	oxygen	4859209
17		output	carbon dioxide	2429604		y
17		output	carbon monoxide	242		y
17		output	dinitrogen monoxide	24		y
17		output	oxygen	4859209		y
17		output	nitrogen	41303283		y
18	desorption	input	acrolein	10507240		y
18		input	water	42723665		y
18		process	acrolein	10507240
18		process	water	42723665
18		output	acrolein	10507240		n
18		output	water	42723665		n
19	compressor	input	acetylene	4596722		n
19		input	methanol	6805902		n
19		input	nitrogen	4044037		n
19		process	acetylene	4596722		y
19		process	methanol	6805902		y
19		process	nitrogen	4044037		y
19		output	acetylene	4596722		y
19		output	methanol	6805902		y
19		output	nitrogen	4044037		y
20	pressure reactor	input	acetylene	4596722	150	y
20		input	methanol	6805902	150	y
20		input	nitrogen	4044037	150	y
20		process	acetylene	4596722	150	y
20		process	methanol	6805902	150	y
20		process	nitrogen	4044037	150	y
20		process	catalyst	218344	150	y
20		output	methylvinylether	9252969	150
20		output	catalyst	218344
20		output	emissions, air unspec.	3882275
20		output	acetylene	45967
20		output	nitrogen	4044037
20		output	methanol	1701475
21	condenser	input	methylvinylether	9252969		y
21		input	emissions, air unspec.	3882275		y
21		input	acetylene	45967		y
21		input	nitrogen	4044037		y
21		input	methanol	1701475		y
21		process	emissions, air unspec.	3882275		y
21		process	acetylene	45967		y
21		process	nitrogen	4044037		y
21		process	methanol	1701475		y
21		process	methylvinylether	9252969		y
21		output	emissions, air unspec.	3882275		n
21		output	acetylene	45967		y
21		output	nitrogen	161761
21		output	methanol	1701475		y
21		output	methylvinylether	9252969		y
22	pressure de-aerator	input	methylvinylether	9252969		y
22		input	acetylene	45967		y
22		input	methanol	1701475		y
22		process	methylvinylether	9252969		y
22		process	acetylene	45967		y
22		process	methanol	1701475		y
22		output	methylvinylether	9252969		y
22		output	acetylene	45967		n
22		output	methanol	1701475		y
23	column	input	methylvinylether	9252969		y
23		input	methanol	1701475
23		process	methanol	1701475		y
23		process	methylvinylether	9252969
23		output	methylvinylether	9252969
23		output	methanol	1701475
24	destillation	input	methanol	1701475
24		input	methylvinylether	9252969
24		process	methanol	1701475
24		process	methylvinylether	9252969
24		output	methanol	1701475		n
24		output	methylvinylether	9252969		n
25	washing column	input	methylvinylether	9252969		n
25		input	water	4626484		n
25		process	methylvinylether	9252969
25		process	water	4626484
25		output	methylvinylether	9252969
25		output	water	1850593
25		output	water	2775890
26	drying	input	water	1850593		y
26		input	methylvinylether	9252969		y
26		input	potassium hydroxide	925296		y
26		process	water	1850593		y
26		process	methylvinylether	9252969		y
26		process	potassium hydroxide	925296		y
26		output	water	1850593		n
26		output	methylvinylether	9252969		n
26		output	potassium hydroxide	925296		n
27	tubular reactor	input	methylvinylether	9252969	170	n
27		input	acrolein	10507240	170	n
27		process	methylvinylether	9252969	170	y
27		process	acrolein	10507240	170	y
27		output	methylvinylether	6168646	170	y
27		output	acrolein	1167471	170	y
27		output	MDP	18184123	170	y
28	processing MDP	input	methylvinylether	6168646	170	y
28		input	acrolein	1167471	170	y
28		input	MDP	18184123	170	y
28		process	methylvinylether	6168646	170	y
28		process	acrolein	1167471	170	y
28		process	MDP	18184123	170	y
28		output	methylvinylether	6168646
28		output	acrolein	1167471		y
28		output	MDP	18184123		y
29	reactor	input	MDP	18184123
29		input	phosphoric acid	71691
29		input	water	14338278
29		process	MDP	18184123
29		process	phosphoric acid	71691
29		process	water	14338278
29		output	glutaraldehyde	15000000
29		output	MDP	181841
29		output	water	14338278
29		output	byproducts	898616
29		output	methanol	4800719
30	neutralization	input	glutaraldehyde	15000000	90	y
30		input	MDP	181841	90	y
30		input	water	14338278	30	y
30		input	byproducts	898616	90	y
30		input	methanol	4800719	90	y
30		input	sodium hydroxide	87778	90	y
30		process	glutaraldehyde	15000000	90	y
30		process	MDP	181841	90	y
30		process	water	14338278	90	y
30		process	byproducts	898616	90	y
30		process	methanol	4800719	90	y
30		process	sodium hydroxide	87778	90	y
30		output	glutaraldehyde	15000000	90	y
30		output	MDP	181841	90	y
30		output	water	14338278	90	y
30		output	byproducts	898616	90	y
30		output	methanol	4800719	90	y
30		output	sodium phosphate	119929	90	n
31	processing glutaraldehyde	input	glutaraldehyde	15000000	90	y
31		input	MDP	181841	90	y
31		input	water	11680765	90	y
31		input	byproducts	898616	90	y
31		input	methanol	4800719	90	y
31		process	glutaraldehyde	15000000	90	y
31		process	MDP	181841	90	y
31		process	water	11680765	90	y
31		process	byproducts	898616	90	y
31		process	methanol	4800719	90	y
31		output	glutaraldehyde	15000000		n
31		output	MDP	181841		y
31		output	water	11680765		y
31		output	byproducts	898616		y
31		output	methanol	4800719		y

## Sheet: INPUT-Skin
					IF solid
Step	Name	in/out	Substance	Task group	dry/wet	restriction	work level	amount	automation	clothing	EBA
1	upstream: propylene	input	propane
1	upstream: propylene	input	oxygen
1	upstream: propylene	process	propane
1	upstream: propylene	process	oxygen
1	upstream: propylene	output	propylene
1	upstream: propylene	output	water
2	upstream: methanol	input	natural gas
2	upstream: methanol	input	oxygen
2	upstream: methanol	process	carbon monoxide
2	upstream: methanol	process	hydrogen
2	upstream: methanol	output	carbon monoxide
2	upstream: methanol	output	hydrogen
3	upstream: methanol 2	input	carbon monoxide
3	upstream: methanol 2	input	hydrogen
3	upstream: methanol 2	process	carbon monoxide
3	upstream: methanol 2	process	hydrogen
3	upstream: methanol 2	output	methanol
4	upstream: acetylene	input	natural gas
4	upstream: acetylene	process	natural gas
4	upstream: acetylene	output	acetylene
4	upstream: acetylene	output	hydrogen
5	upstream: sodium hydroxide	input	sodium chloride
5	upstream: sodium hydroxide	process	sodium chloride
5	upstream: sodium hydroxide	output	sodium
5	upstream: sodium hydroxide	output	chlorine (Cl2)
6	upstream: sodium hydroxide 2	input	sodium
6	upstream: sodium hydroxide 2	input	water
6	upstream: sodium hydroxide 2	process	sodium
6	upstream: sodium hydroxide 2	process	water
6	upstream: sodium hydroxide 2	output	sodium hydroxide
6	upstream: sodium hydroxide 2	output	hydrogen
7	upstream: phosphoric acid	input	sulfur
7	upstream: phosphoric acid	input	air
7	upstream: phosphoric acid	process	sulfur
7	upstream: phosphoric acid	process	air
7	upstream: phosphoric acid	output	sulfur dioxide
8	upstream: phosphoric acid 2	input	sulfur dioxide
8	upstream: phosphoric acid 2	input	oxygen
8	upstream: phosphoric acid 2	process	sulfur dioxide
8	upstream: phosphoric acid 2	process	oxygen
8	upstream: phosphoric acid 2	output	sulfur trioxide
9	upstream: phosphoric acid 3	input	sulfur trioxide
9	upstream: phosphoric acid 3	input	water
9	upstream: phosphoric acid 3	process	sulfur trioxide
9	upstream: phosphoric acid 3	process	water
9	upstream: phosphoric acid 3	output	sulfuric acid
10	upstream: phosphoric acid 4	input	sulfuric acid
10	upstream: phosphoric acid 4	input	apatite
10	upstream: phosphoric acid 4	process	sulfuric acid
10	upstream: phosphoric acid 4	process	apatite
10	upstream: phosphoric acid 4	output	phosphoric acid
10	upstream: phosphoric acid 4	output	byproducts
11	upstream: potassium hydroxide	input	potassium chloride
11	upstream: potassium hydroxide	process	potassium chloride
11	upstream: potassium hydroxide	output	potassium
11	upstream: potassium hydroxide	output	chlorine (Cl2)
12	upstream: potassium hydroxide 2	input	potassium
12	upstream: potassium hydroxide 2	input	water
12	upstream: potassium hydroxide 2	process	potassium
12	upstream: potassium hydroxide 2	process	water
12	upstream: potassium hydroxide 2	output	potassium hydroxide
12	upstream: potassium hydroxide 2	output	hydrogen
13	fixed-bed reactor	input	propylene
13	fixed-bed reactor	input	air
13	fixed-bed reactor	input	catalyst, metal oxyde
13	fixed-bed reactor	process	catalyst, metal oxyde
13	fixed-bed reactor	process	acrolein
13	fixed-bed reactor	process	sewage
13	fixed-bed reactor	process	acetic acid
13	fixed-bed reactor	process	acrylic acid
13	fixed-bed reactor	output	catalyst, metal oxyde
13	fixed-bed reactor	output	acrolein
13	fixed-bed reactor	output	sewage
13	fixed-bed reactor	output	acetic acid
13	fixed-bed reactor	output	acrylic acid
14	quench	input	acrolein
14	quench	input	sewage
14	quench	input	acetic acid
14	quench	input	acrylic acid
14	quench	process	acrolein
14	quench	process	sewage
14	quench	process	acetic acid
14	quench	process	acrylic acid
14	quench	output	acrolein
14	quench	output	sewage
14	quench	output	acetic acid
14	quench	output	acrylic acid
15	gas purification	input	acrolein
15	gas purification	input	sewage
15	gas purification	input	acetic acid
15	gas purification	input	acrylic acid
15	gas purification	process	acrolein
15	gas purification	process	sewage
15	gas purification	process	acetic acid
15	gas purification	process	acrylic acid
15	gas purification	output	acrolein
15	gas purification	output	sewage
15	gas purification	output	acetic acid
15	gas purification	output	acrylic acid
16	adsorption	input	acrolein
16	adsorption	input	water
16	adsorption	process	acrolein
16	adsorption	process	water
16	adsorption	output	carbon dioxide
16	adsorption	output	carbon monoxide
16	adsorption	output	nitrogen
16	adsorption	output	oxygen
16	adsorption	output	acrolein
17	combustion	input	carbon dioxide
17	combustion	input	carbon monoxide
17	combustion	input	nitrogen
17	combustion	input	oxygen
17	combustion	output	carbon dioxide
17	combustion	output	carbon monoxide
17	combustion	output	dinitrogen monoxide
17	combustion	output	oxygen
17	combustion	output	nitrogen
18	desorption	input	acrolein
18	desorption	input	water
18	desorption	process	acrolein
18	desorption	process	water
18	desorption	output	acrolein
18	desorption	output	water
19	compressor	input	acetylene
19	compressor	input	methanol
19	compressor	input	nitrogen
19	compressor	process	acetylene
19	compressor	process	methanol
19	compressor	process	nitrogen
19	compressor	output	acetylene
19	compressor	output	methanol
19	compressor	output	nitrogen
20	pressure reactor	input	acetylene
20	pressure reactor	input	methanol
20	pressure reactor	input	nitrogen
20	pressure reactor	process	acetylene
20	pressure reactor	process	methanol
20	pressure reactor	process	nitrogen
20	pressure reactor	process	catalyst
20	pressure reactor	output	methylvinylether
20	pressure reactor	output	catalyst
20	pressure reactor	output	emissions, air unspec.
20	pressure reactor	output	acetylene
20	pressure reactor	output	nitrogen
20	pressure reactor	output	methanol
21	condenser	input	methylvinylether
21	condenser	input	emissions, air unspec.
21	condenser	input	acetylene
21	condenser	input	nitrogen
21	condenser	input	methanol
21	condenser	process	emissions, air unspec.
21	condenser	process	acetylene
21	condenser	process	nitrogen
21	condenser	process	methanol
21	condenser	process	methylvinylether
21	condenser	output	emissions, air unspec.
21	condenser	output	acetylene
21	condenser	output	nitrogen
21	condenser	output	methanol
21	condenser	output	methylvinylether
22	pressure de-aerator	input	methylvinylether
22	pressure de-aerator	input	acetylene
22	pressure de-aerator	input	methanol
22	pressure de-aerator	process	methylvinylether
22	pressure de-aerator	process	acetylene
22	pressure de-aerator	process	methanol
22	pressure de-aerator	output	methylvinylether
22	pressure de-aerator	output	acetylene
22	pressure de-aerator	output	methanol
23	column	input	methylvinylether
23	column	input	methanol
23	column	process	methanol
23	column	process	methylvinylether
23	column	output	methylvinylether
23	column	output	methanol
24	destillation	input	methanol
24	destillation	input	methylvinylether
24	destillation	process	methanol
24	destillation	process	methylvinylether
24	destillation	output	methanol
24	destillation	output	methylvinylether
25	washing column	input	methylvinylether
25	washing column	input	water
25	washing column	process	methylvinylether
25	washing column	process	water
25	washing column	output	methylvinylether
25	washing column	output	water
25	washing column	output	water
26	drying	input	water
26	drying	input	methylvinylether
26	drying	input	potassium hydroxide
26	drying	process	water
26	drying	process	methylvinylether
26	drying	process	potassium hydroxide
26	drying	output	water
26	drying	output	methylvinylether
26	drying	output	potassium hydroxide
27	tubular reactor	input	methylvinylether
27	tubular reactor	input	acrolein
27	tubular reactor	process	methylvinylether
27	tubular reactor	process	acrolein
27	tubular reactor	output	methylvinylether
27	tubular reactor	output	acrolein
27	tubular reactor	output	MDP
28	processing MDP	input	methylvinylether
28	processing MDP	input	acrolein
28	processing MDP	input	MDP
28	processing MDP	process	methylvinylether
28	processing MDP	process	acrolein
28	processing MDP	process	MDP
28	processing MDP	output	methylvinylether
28	processing MDP	output	acrolein
28	processing MDP	output	MDP
29	reactor	input	MDP
29	reactor	input	phosphoric acid
29	reactor	input	water
29	reactor	process	MDP
29	reactor	process	phosphoric acid
29	reactor	process	water
29	reactor	output	glutaraldehyde
29	reactor	output	MDP
29	reactor	output	water
29	reactor	output	byproducts
29	reactor	output	methanol
30	neutralization	input	glutaraldehyde
30	neutralization	input	MDP
30	neutralization	input	water
30	neutralization	input	byproducts
30	neutralization	input	methanol
30	neutralization	input	sodium hydroxide
30	neutralization	process	glutaraldehyde
30	neutralization	process	MDP
30	neutralization	process	water
30	neutralization	process	byproducts
30	neutralization	process	methanol
30	neutralization	process	sodium hydroxide
30	neutralization	output	glutaraldehyde
30	neutralization	output	MDP
30	neutralization	output	water
30	neutralization	output	byproducts
30	neutralization	output	methanol
30	neutralization	output	sodium phosphate
31	processing glutaraldehyde	input	glutaraldehyde
31	processing glutaraldehyde	input	MDP
31	processing glutaraldehyde	input	water
31	processing glutaraldehyde	input	byproducts
31	processing glutaraldehyde	input	methanol
31	processing glutaraldehyde	process	glutaraldehyde
31	processing glutaraldehyde	process	MDP
31	processing glutaraldehyde	process	water
31	processing glutaraldehyde	process	byproducts
31	processing glutaraldehyde	process	methanol
31	processing glutaraldehyde	output	glutaraldehyde
31	processing glutaraldehyde	output	MDP
31	processing glutaraldehyde	output	water
31	processing glutaraldehyde	output	byproducts
31	processing glutaraldehyde	output	methanol
0
0
0
0
0
0
0
0
0
0
0
0
0
0
0
0
0
0
0
0
0
0
0
0
0
0
0
0
0
0
0
0
0
0
0
0
0
0
0
0
0

## Sheet: RESULT-
HI	inhalation+skin systemic+skinlocal				inhalation				skin systemic				skin local
step	input	process	output	step	input	process	output	step	input	process	output	step	input	process	output
step	input	process	output
1	0.0157213	0.0374574	0.0157213	1	0.0157213	0.0374574	0.0157213	1	0	0	0	1	0	0	0
2	0.0314426	0.133955	0.141492	2	0.0314426	0.133955	0.141492	2	0	0	0	2	0	0	0
3	0.141492	0.175422	0.145032	3	0.141492	0.175422	0.118243	3	0	0	0.0133944	3	0	0	0.0133944
4	0.0157213	0.0157213	0.0314426	4	0.0157213	0.0157213	0.0314426	4	0	0	0	4	0	0	0
5	0	0	0.238894	5	0	0	0.115348	5	0	0	0.0078125	5	0	0	0.115734
6	0.176009	0.132284	0.170711	6	0.0524623	0.0629771	0.0471639	6	0.0078125	0.00438261	0.0078125	6	0.115734	0.064924	0.115734
7	0.0386378	0.0339368	0.0628852	7	0.00786065	0.0185482	0.0628852	7	0.0078125	0.00390625	0	7	0.0229646	0.0114823	0
8	0.0786065	0.0957903	0.186432	8	0.0786065	0.0957903	0.0628852	8	0	0	0.0078125	8	0	0	0.115734
9	0.186432	0.18073	0.137	9	0.0628852	0.0798742	0.0134536	9	0.0078125	0.00637761	0.0078125	9	0.115734	0.0944779	0.115734
10	0.137	0.0337785	0.149967	10	0.0134536	0.0134296	0.0264198	10	0.0078125	0.00128676	0.0078125	10	0.115734	0.0190621	0.115734
11	0	0	0.230899	11	0	0	0.107352	11	0	0	0.0078125	11	0	0	0.115734
12	0.168013	0.139531	0.183735	12	0.0444666	0.0549985	0.0601879	12	0.0078125	0.0053454	0.0078125	12	0.115734	0.0791867	0.115734
13	0.0157213	0.224306	0.177556	13	0.0157213	0.197774	0.151024	13	0	0.00906708	0.00906708	13	0	0.0174649	0.0174649
14	0.177556	0.224306	0.190069	14	0.151024	0.197774	0.153519	14	0.00906708	0.00906708	0.00893752	14	0.0174649	0.0174649	0.0276131
15	0.171954	0.21697	0.17913	15	0.145422	0.190438	0.148558	15	0.00906708	0.00906708	0.0104477	15	0.0174649	0.0174649	0.0201243
16	0.306313	0.162418	0.220662	16	0.123074	0.126249	0.181039	16	0.0675037	0.0133246	0.0145966	16	0.115734	0.0228448	0.0250256
17	0.141492	0	0.0329025	17	0.141492	0	0.0329025	17	0	0	0	17	0	0	0
18	0.135582	0.166355	0.31015	18	0.0994122	0.130186	0.126912	18	0.0133246	0.0133246	0.0675037	18	0.0228448	0.0228448	0.115734
19	0.160753	0.165833	0.129423	19	0.133965	0.15403	0.11762	19	0.0133944	0.00590168	0.00590168	19	0.0133944	0.00590168	0.00590168
20	0.136077	0.174038	0.176475	20	0.124274	0.162399	0.149686	20	0.00590168	0.00581942	0.0133944	20	0.00590168	0.00581942	0.0133944
21	0.105158	0.136964	0.115638	21	0.10275	0.134556	0.111494	21	0.00120413	0.00120413	0.00207177	21	0.00120413	0.00120413	0.00207177
22	0.115638	0.150151	0.115725	22	0.111494	0.146007	0.111564	22	0.00207177	0.00207177	0.00208046	22	0.00207177	0.00207177	0.00208046
23	0.112286	0.141228	0.160753	23	0.10736	0.137067	0.133965	23	0.00246303	0.00208046	0.0133944	23	0.00246303	0.00208046	0.0133944
24	0.160753	0.141228	0.160753	24	0.133965	0.137067	0.133965	24	0.0133944	0.00208046	0.0133944	24	0.0133944	0.00208046	0.0133944
25	0.0157213	0.019369	0.0157213	25	0.0157213	0.019369	0.0157213	25	0	0	0	25	0	0	0
26	0.0548413	0.0688758	0.183735	26	0.0453377	0.0593722	0.0601879	26	0.000600961	0.000600961	0.0078125	26	0.00890263	0.00890263	0.115734
27	0.32473	0.265567	0.145126	27	0.141492	0.168133	0.121632	27	0.0675037	0.0358943	0.00865478	27	0.115734	0.0615403	0.0148385
28	0.145126	0.186755	0.148272	28	0.121632	0.159284	0.11729	28	0.00865478	0.0126321	0.0114136	28	0.0148385	0.0148385	0.0195685
29	0.192257	0.0511639	0.437533	29	0.0475029	0.0390609	0.260408	29	0.015625	0.00437575	0.0346014	29	0.129129	0.00772727	0.142523
30	0.352002	0.561105	0.355073	30	0.293084	0.383809	0.296211	30	0.00757142	0.0305881	0.00759742	30	0.0513468	0.146708	0.0512645
31	0.347323	0.563523	0.343947	31	0.28377	0.371612	0.226113	31	0.0081887	0.0331459	0.0151828	31	0.0553638	0.158765	0.102651
32	0	0	0	32	0	0	0	32	0	0	0	32	0	0	0
33	0	0	0	33	0	0	0	33	0	0	0	33	0	0	0
34	0	0	0	34	0	0	0	34	0	0	0	34	0	0	0
35	0	0	0	35	0	0	0	35	0	0	0	35	0	0	0
		inhalation	skin sys.	skin loc.
	1	0.0689	0	0
	2	0.30689	0	0
	3	0.435157	0.0133944	0.0133944
	4	0.0628852	0	0
	5	0.115348	0.0078125	0.115734
	6	0.162603	0.0200076	0.296393
	7	0.0892941	0.0117187	0.0344469
	8	0.237282	0.0078125	0.115734
	9	0.156213	0.0220026	0.325947
	10	0.053303	0.0169118	0.250531
	11	0.107352	0.0078125	0.115734
	12	0.159653	0.0209704	0.310655
	13	0.36452	0.0181342	0.0349298
	14	0.502317	0.0270717	0.0625429
	15	0.484418	0.0285819	0.0550541
	16	0.430363	0.0954249	0.163605
	17	0.174394	0	0
	18	0.35651	0.0941528	0.161424
	19	0.405614	0.0251978	0.0251978
	20	0.436359	0.0251155	0.0251155
	21	0.3488	0.00448003	0.00448003
	22	0.369066	0.006224	0.006224
	23	0.378391	0.0179379	0.0179379
	24	0.404996	0.0288693	0.0288693
	25	0.0508116	0	0
	26	0.164898	0.00901442	0.13354
	27	0.431257	0.112053	0.192113
	28	0.398207	0.0327005	0.0492456
	29	0.346972	0.0546021	0.279379
	30	0.973103	0.0457569	0.249319
	31	0.881495	0.0565174	0.31678
	32	0	0	0
	33	0	0	0
	34	0	0	0
	35	0	0	0
						14.052

## Sheet: WH
Allokation of R-phrases			Determination Weighting Factor for Hazard (WH)
R-phrase	Hazard Group	Hazard-Nr	Substance	Hazard-Nrs										toxic?	harmfull?	48/68	combination	Hazard combination	MAX-Hazard	WH
1		1	propylene	1	0	0	0	0	0	0	0	0	0	no	no	no	no		1	0.0625
2		1	oxygen	1	0	0	0	0	0	0	0	0	0	no	no	no	no		1	0.0625
3		1	catalyst, metal oxyde	0	0	0	0	0	0	0	0	0	0	no	no	no	no		0	0
4		1	acrolein	1	3	3	4	3	4	0	0	0	0	toxic	no	no	no		4	0.5
5		1	acrylic acid	1	2	2	2	3	1	0	0	0	0	no	harmful	no	no		3	0.25
6		1	phosphoric acid	3	0	0	0	0	0	0	0	0	0	no	no	no	no		3	0.25
7		1	acetaldehyde	1	1	3	4	0	0	0	0	0	0	no	no	no	no		4	0.5
8		1	MDP	1	2	1	0	0	0	0	0	0	0	no	harmful	no	no		2	0.125
9		1	methane	1	0	0	0	0	0	0	0	0	0	no	no	no	no		1	0.0625
10		1	methylvinylether	1	0	0	0	0	0	0	0	0	0	no	no	no	no		1	0.0625
11		1	nitrogen	0	0	0	0	0	0	0	0	0	0	no	no	no	no		0	0
12		1	propane	1	0	0	0	0	0	0	0	0	0	no	no	no	no		1	0.0625
13		1	water	0	0	0	0	0	0	0	0	0	0	no	no	no	no		0	0
14		1	sewage	0	0	0	0	0	0	0	0	0	0	no	no	no	no		0	0
15		1	inert gas	0	0	0	0	0	0	0	0	0	0	no	no	no	no		0	0
16		1	byproducts	0	0	0	0	0	0	0	0	0	0	no	no	no	no		0	0
17		1	methanol	1	3	3	3	4	0	0	0	0	0	toxic	no	no	no		4	0.5
18		1	acetylene	1	0	0	0	0	0	0	0	0	0	no	no	no	no		1	0.0625
19		1	acetic acid	1	3	0	0	0	0	0	0	0	0	no	no	no	no		3	0.25
20	B	2	carbon monoxide	1	3	1	4	0	0	0	0	0	0	toxic	no	48	48toxic	4	4	0.5
21	B	2	carbon dioxide	0	0	0	0	0	0	0	0	0	0	no	no	no	no		0	0
22	B	2	dinitrogen monoxide	1	0	0	0	0	0	0	0	0	0	no	no	no	no		1	0.0625
23	C	3	catalyst	0	0	0	0	0	0	0	0	0	0	no	no	no	no		0	0
24	C	3	emissions, air unspec.	0	0	0	0	0	0	0	0	0	0	no	no	no	no		0	0
25	C	3	potassium hydroxide	2	3	0	0	0	0	0	0	0	0	no	harmful	no	no		3	0.25
26	D	4	glutaraldehyde	3	3	3	5	3	1	0	0	0	0	toxic	no	no	no		5	1
27	D	4	sodium hydroxide	3	0	0	0	0	0	0	0	0	0	no	no	no	no		3	0.25
28	D	4	sodium phosphate	1	3	1	0	0	0	0	0	0	0	no	no	no	no		3	0.25
29		1	sodium	1	1	3	0	0	0	0	0	0	0	no	no	no	no		3	0.25
30		1	natural gas	1	0	0	0	0	0	0	0	0	0	no	no	no	no		1	0.0625
31		1	air	0	0	0	0	0	0	0	0	0	0	no	no	no	no		0	0
32		1	hydrogen	1	0	0	0	0	0	0	0	0	0	no	no	no	no		1	0.0625
33		1	sodium chloride	0	0	0	0	0	0	0	0	0	0	no	no	no	no		0	0
34	C	3	chlorine (Cl2)	3	1	3	1	1	0	0	0	0	0	toxic	no	no	no		3	0.25
35	C	3	apatite	0	0	0	0	0	0	0	0	0	0	no	no	no	no		0	0
36		1	sulfuric acid	3	0	0	0	0	0	0	0	0	0	no	no	no	no		3	0.25
37	C	3	sulfur dioxide	3	3	0	0	0	0	0	0	0	0	toxic	no	no	no		3	0.25
38		1	sulfur trioxide	1	3	0	0	0	0	0	0	0	0	no	no	no	no		3	0.25
39	D	4	sulfur	1	0	0	0	0	0	0	0	0	0	no	no	no	no		1	0.0625
40	D	4	potassium chloride	0	0	0	0	0	0	0	0	0	0	no	no	no	no		0	0
41	C	3	potassium	1	1	3	0	0	0	0	0	0	0	no	no	no	no		3	0.25
42	E	5	0	0	0	0	0	0	0	0	0	0	0	no	no	no	no		0	0
43	C	3	0	0	0	0	0	0	0	0	0	0	0	no	no	no	no		0	0
44		1	0	0	0	0	0	0	0	0	0	0	0	no	no	no	no		0	0
45	E	5	0	0	0	0	0	0	0	0	0	0	0	no	no	no	no		0	0
46	E	5	0	0	0	0	0	0	0	0	0	0	0	no	no	no	no		0	0
47		1	0	0	0	0	0	0	0	0	0	0	0	no	no	no	no		0	0
48		1	0	0	0	0	0	0	0	0	0	0	0	no	no	no	no		0	0
49	E	5	0	0	0	0	0	0	0	0	0	0	0	no	no	no	no		0	0
50		1	0	0	0	0	0	0	0	0	0	0	0	no	no	no	no		0	0
51		1	0	0	0	0	0	0	0	0	0	0	0	no	no	no	no		0	0
52		1	0	0	0	0	0	0	0	0	0	0	0	no	no	no	no		0	0
53		1	0	0	0	0	0	0	0	0	0	0	0	no	no	no	no		0	0
54		1	0	0	0	0	0	0	0	0	0	0	0	no	no	no	no		0	0
55		1	0	0	0	0	0	0	0	0	0	0	0	no	no	no	no		0	0
56		1	0	0	0	0	0	0	0	0	0	0	0	no	no	no	no		0	0
57		1	0	0	0	0	0	0	0	0	0	0	0	no	no	no	no		0	0
58		1	0	0	0	0	0	0	0	0	0	0	0	no	no	no	no		0	0
59		1	0	0	0	0	0	0	0	0	0	0	0	no	no	no	no		0	0
60	D	4	0	0	0	0	0	0	0	0	0	0	0	no	no	no	no		0	0
61	D	4	0	0	0	0	0	0	0	0	0	0	0	no	no	no	no		0	0
62	D	4	0	0	0	0	0	0	0	0	0	0	0	no	no	no	no		0	0
63	D	4	0	0	0	0	0	0	0	0	0	0	0	no	no	no	no		0	0
64	D	4	0	0	0	0	0	0	0	0	0	0	0	no	no	no	no		0	0
65		1	0	0	0	0	0	0	0	0	0	0	0	no	no	no	no		0	0
66		1	0	0	0	0	0	0	0	0	0	0	0	no	no	no	no		0	0
67		1	0	0	0	0	0	0	0	0	0	0	0	no	no	no	no		0	0
68		1	0	0	0	0	0	0	0	0	0	0	0	no	no	no	no		0	0
48harmful		3	0	0	0	0	0	0	0	0	0	0	0	no	no	no	no		0	0
48toxic		4	0	0	0	0	0	0	0	0	0	0	0	no	no	no	no		0	0
68harmful		2	0	0	0	0	0	0	0	0	0	0	0	no	no	no	no		0	0
68toxic		3	0	0	0	0	0	0	0	0	0	0	0	no	no	no	no		0	0
			0	0	0	0	0	0	0	0	0	0	0	no	no	no	no		0	0
			0	0	0	0	0	0	0	0	0	0	0	no	no	no	no		0	0
			0	0	0	0	0	0	0	0	0	0	0	no	no	no	no		0	0
			0	0	0	0	0	0	0	0	0	0	0	no	no	no	no		0	0
			0	0	0	0	0	0	0	0	0	0	0	no	no	no	no		0	0
			0	0	0	0	0	0	0	0	0	0	0	no	no	no	no		0	0
			0	0	0	0	0	0	0	0	0	0	0	no	no	no	no		0	0
			0	0	0	0	0	0	0	0	0	0	0	no	no	no	no		0	0
			0	0	0	0	0	0	0	0	0	0	0	no	no	no	no		0	0
			0	0	0	0	0	0	0	0	0	0	0	no	no	no	no		0	0
			0	0	0	0	0	0	0	0	0	0	0	no	no	no	no		0	0
			0	0	0	0	0	0	0	0	0	0	0	no	no	no	no		0	0
			0	0	0	0	0	0	0	0	0	0	0	no	no	no	no		0	0
			0	0	0	0	0	0	0	0	0	0	0	no	no	no	no		0	0
			0	0	0	0	0	0	0	0	0	0	0	no	no	no	no		0	0
			0	0	0	0	0	0	0	0	0	0	0	no	no	no	no		0	0
			0	0	0	0	0	0	0	0	0	0	0	no	no	no	no		0	0
			0	0	0	0	0	0	0	0	0	0	0	no	no	no	no		0	0
			0	0	0	0	0	0	0	0	0	0	0	no	no	no	no		0	0
			0	0	0	0	0	0	0	0	0	0	0	no	no	no	no		0	0
			0	0	0	0	0	0	0	0	0	0	0	no	no	no	no		0	0
			0	0	0	0	0	0	0	0	0	0	0	no	no	no	no		0	0
			0	0	0	0	0	0	0	0	0	0	0	no	no	no	no		0	0
			0	0	0	0	0	0	0	0	0	0	0	no	no	no	no		0	0
			0	0	0	0	0	0	0	0	0	0	0	no	no	no	no		0	0
			0	0	0	0	0	0	0	0	0	0	0	no	no	no	no		0	0

## Sheet: Substances
Substances and properties	aggregate state	Boiling Point		IF solid		Oppl-factor
Substance	at room temperature	Temp (°C)	Temp. (K)	texture	WH	*(0.1)
propylene	gas	-47.7	225.45		0.0625	0.1
oxygen	gas				0.0625	0.1
catalyst, metal oxyde	solid			Granules or flakes	0	0.1
acrolein	liquid	52	325.15		0.5	1
acrylic acid	liquid	141	414.15		0.25	1
phosphoric acid	liquid	213	486.15		0.25	1
acetaldehyde	liquid	20.4	293.55		0.5	1
MDP	liquid	127.1	400.25		0.125	1
methane	gas				0.0625	0.1
methylvinylether	gas				0.0625	0.1
nitrogen	gas				0	0.1
propane	gas	-42	231.15		0.0625	0.1
water	liquid	100	373.15		0	1
sewage	liquid	100	373.15		0	1
inert gas	gas				0	0.1
byproducts	liquid	100	373.15		0	1
methanol	liquid	65	338.15		0.5	1
acetylene	gas				0.0625	0.1
acetic acid	liquid	118	391.15		0.25	1
carbon monoxide	gas				0.5	0.1
carbon dioxide	gas				0	0.1
dinitrogen monoxide	gas				0.0625	0.1
catalyst	solid			0	0	0.1
emissions, air unspec.	gas				0	0.1
potassium hydroxide	solid			Coarse Dust	0.25	0.1
glutaraldehyde	liquid	188	461.15		1	1
sodium hydroxide	solid			Firm granules or flakes	0.25	0.1
sodium phosphate	solid			Granules or flakes	0.25	0.1
sodium	solid			Fine dust	0.25	0.1
natural gas	gas				0.0625	0.1
air	gas				0	0.1
hydrogen	gas				0.0625	0.1
sodium chloride	solid			Firm granules or flakes	0	0.1
chlorine (Cl2)	gas				0.25	0.1
apatite	solid			Solid objects	0	0.1
sulfuric acid	liquid	337	610.15		0.25	1
sulfur dioxide	gas				0.25	0.1
sulfur trioxide	solid			Extremely dusty products	0.25	0.1
sulfur	solid	444.72	717.87	Firm granules or flakes	0.0625	0.1
potassium chloride	solid			Coarse Dust	0	0.1
potassium	solid			Coarse Dust	0.25	0.1
0	0				0	1
0	0				0	1
0	0				0	1
0	0				0	1
0	0				0	1
0	0				0	1
0	0				0	1
0	0				0	1
0	0				0	1
0	0				0	1
0	0				0	1
0	0				0	1
0	0				0	1
0	0				0	1
0	0				0	1
0	0				0	1
0	0				0	1
0	0				0	1
0	0				0	1
0	0				0	1
0	0				0	1
0	0				0	1
0	0				0	1
0	0				0	1
0	0				0	1
0	0				0	1
0	0				0	1
0	0				0	1
0	0				0	1
0	0				0	1
0	0				0	1
0	0				0	1
0	0				0	1
0	0				0	1
0	0				0	1
0	0				0	1
0	0				0	1
0	0				0	1
0	0				0	1
0	0				0	1
0	0				0	1
0	0				0	1
0	0				0	1
0	0				0	1
0	0				0	1
0	0				0	1
0	0				0	1
0	0				0	1
0	0				0	1
0	0				0	1
0	0				0	1
0	0				0	1
0	0				0	1
0	0				0	1
0	0				0	1
0	0				0	1
0	0				0	1

## Sheet: Inhalation-E,WE,HS
							intrinsic emission solid		intrinsic emission liquid
Step	Name	in/out	Substance	aggregate state	amount	Mix	texture	E solid	BP (K)	T (K)	ln(p) (atm)	p (Pa)	E	B (w/o mass fraction!)	mix?	fraction	B	WE	WH	HS Inhalation
1	upstream: propylene	input	propane	gas	10332043	n							1	0.000104167	0	1	0.000104167	0.251541	0.0625	0.0157213
1	0	input	oxygen	gas	3748587	n							1	0.000104167	0	1	0.000104167	0.251541	0.0625	0.0157213
1	0	process	propane	gas	10332043	y							1	0.000625	10332043	1	0.000625	0.329406	0.0625	0.0205879
1	0	process	oxygen	gas	3748587	y							1	0.000625	14080630	0.266223	0.000166389	0.269912	0.0625	0.0168695
1	0	output	propylene	gas	9858784	n							1	0.000104167	0	1	0.000104167	0.251541	0.0625	0.0157213
1	0	output	water	liquid	4221846	n			373.15	293.15	-2.89272	5615.98	0.187199	1.94999e-05	0	1	1.94999e-05	0.19547	0	0
2	upstream: methanol	input	natural gas	gas	2555399	n							1	0.000104167	0	1	0.000104167	0.251541	0.0625	0.0157213
2	0	input	oxygen	gas	2549027	n							1	0.000104167	0	1	0.000104167	0.251541	0.0625	0.0157213
2	0	process	carbon monoxide	gas	2549027	y							1	0.000104167	3186283	0.8	8.33334e-05	0.243233	0.5	0.121616
2	0	process	hydrogen	gas	637256	y							1	0.000104167	3186283	0.2	2.08333e-05	0.197425	0.0625	0.0123391
2	0	output	carbon monoxide	gas	2549027	n							1	0.000104167	0	1	0.000104167	0.251541	0.5	0.12577
2	0	output	hydrogen	gas	637256	n							1	0.000104167	0	1	0.000104167	0.251541	0.0625	0.0157213
3	upstream: methanol 2	input	carbon monoxide	gas	2549027	n							1	0.000104167	0	1	0.000104167	0.251541	0.5	0.12577
3	0	input	hydrogen	gas	637256	n							1	0.000104167	0	1	0.000104167	0.251541	0.0625	0.0157213
3	0	process	carbon monoxide	gas	2549027	y							1	0.000625	3186283	0.8	0.0005	0.318526	0.5	0.159263
3	0	process	hydrogen	gas	637256	y							1	0.000625	3186283	0.2	0.000125	0.258539	0.0625	0.0161587
3	0	output	methanol	liquid	6805902	n			338.15	293.15	-1.62715	19909.2	0.663639	6.9129e-05	0	1	6.9129e-05	0.236487	0.5	0.118243
4	upstream: acetylene	input	natural gas	gas	5374629	n							1	0.000104167	0	1	0.000104167	0.251541	0.0625	0.0157213
4	0	process	natural gas	gas	5374629	y							1	0.000104167	5374629	1	0.000104167	0.251541	0.0625	0.0157213
4	0	output	acetylene	gas	4366886	n							1	0.000104167	0	1	0.000104167	0.251541	0.0625	0.0157213
4	0	output	hydrogen	gas	1007742	n							1	0.000104167	0	1	0.000104167	0.251541	0.0625	0.0157213
5	upstream: sodium hydroxide	input	sodium chloride	solid	128363	n	Firm granules or flakes	0.01					0.01	1.04167e-06	0	1	1.04167e-06	0.12577	0	0
5	0	process	sodium chloride	solid	128363	y	Firm granules or flakes	0.01					0.01	6.25e-06	128363	1	6.25e-06	0.164703	0	0
5	0	output	sodium	solid	50472	n	Fine dust	0.3					0.3	3.125e-05	0	1	3.125e-05	0.209849	0.25	0.0524623
5	0	output	chlorine (Cl2)	gas	77861	n							1	0.000104167	0	1	0.000104167	0.251541	0.25	0.0628852
6	upstream: sodium hydroxide 2	input	sodium	solid	50472	n	Fine dust	0.3					0.3	3.125e-05	0	1	3.125e-05	0.209849	0.25	0.0524623
6	0	input	water	liquid	39500	n			373.15	293.15	-2.89272	5615.98	0.187199	1.94999e-05	0	1	1.94999e-05	0.19547	0	0
6	0	process	sodium	solid	50472	y	Fine dust	0.3					0.3	0.0001875	89972	0.560975	0.000105183	0.251909	0.25	0.0629771
6	0	process	water	liquid	39500	y			373.15	293.15	-2.89272	5615.98	0.187199	0.000117	89972	0.439025	5.13658e-05	0.226148	0	0
6	0	output	sodium hydroxide	solid	87778	n	Firm granules or flakes	0.01					0.01	1.04167e-06	0	1	1.04167e-06	0.12577	0.25	0.0314426
6	0	output	hydrogen	gas	2194	n							1	0.000104167	0	1	0.000104167	0.251541	0.0625	0.0157213
7	upstream: phosphoric acid	input	sulfur	solid	23409	n	Firm granules or flakes	0.01					0.01	1.04167e-06	0	1	1.04167e-06	0.12577	0.0625	0.00786065
7	0	input	air	gas	23409	n							1	0.000104167	0	1	0.000104167	0.251541	0	0
7	0	process	sulfur	gas	23409	y							1	0.000625	46818	0.5	0.0003125	0.296772	0.0625	0.0185482
7	0	process	air	gas	23409	y							1	0.000625	46818	0.5	0.0003125	0.296772	0	0
7	0	output	sulfur dioxide	gas	46818	n							1	0.000104167	0	1	0.000104167	0.251541	0.25	0.0628852
8	upstream: phosphoric acid 2	input	sulfur dioxide	gas	46818	n							1	0.000104167	0	1	0.000104167	0.251541	0.25	0.0628852
8	0	input	oxygen	gas	11704	n							1	0.000104167	0	1	0.000104167	0.251541	0.0625	0.0157213
8	0	process	sulfur dioxide	gas	46818	y							1	0.000625	58522	0.800007	0.000500004	0.318527	0.25	0.0796317
8	0	process	oxygen	gas	11704	y							1	0.000625	58522	0.199993	0.000124996	0.258538	0.0625	0.0161586
8	0	output	sulfur trioxide	solid	58523	n	Extremely dusty products	1					1	0.000104167	0	1	0.000104167	0.251541	0.25	0.0628852
9	upstream: phosphoric acid 3	input	sulfur trioxide	solid	58523	n	Extremely dusty products	1					1	0.000104167	0	1	0.000104167	0.251541	0.25	0.0628852
9	0	input	water	liquid	13167	n			373.15	293.15	-2.89272	5615.98	0.187199	1.94999e-05	0	1	1.94999e-05	0.19547	0	0
9	0	process	sulfur trioxide	solid	58523	y	Extremely dusty products	1					1	0.000625	71690	0.816334	0.000510209	0.319497	0.25	0.0798742
9	0	process	water	liquid	13167	y			373.15	293.15	-2.89272	5615.98	0.187199	0.000117	71690	0.183666	2.14888e-05	0.198348	0	0
9	0	output	sulfuric acid	liquid	71691	n			610.15	293.15	-11.4624	1.06577	3.55257e-05	3.70059e-09	0	1	3.70059e-09	0.0538144	0.25	0.0134536
10	upstream: phosphoric acid 4	input	sulfuric acid	liquid	71691	n			610.15	293.15	-11.4624	1.06577	3.55257e-05	3.70059e-09	0	1	3.70059e-09	0.0538144	0.25	0.0134536
10	0	input	apatite	solid	363577	n	Solid objects	0					0	0	0	1	0	0	0	0
10	0	process	sulfuric acid	liquid	71691	y			610.15	293.15	-11.4624	1.06577	3.55257e-05	2.22035e-08	435268	0.164705	3.65704e-09	0.0537186	0.25	0.0134296
10	0	process	apatite	solid	363577	y	Solid objects	0					0	0	435268	0.835295	0	0	0	0
10	0	output	phosphoric acid	liquid	71691	n			486.15	293.15	-6.97868	94.3875	0.00314625	3.27734e-07	0	1	3.27734e-07	0.105679	0.25	0.0264198
10	0	output	byproducts	liquid	363577	n			373.15	293.15	-2.89272	5615.98	0.187199	1.94999e-05	0	1	1.94999e-05	0.19547	0	0
11	upstream: potassium hydroxide	input	potassium chloride	solid	1230975	n	Coarse Dust	0.1					0.1	1.04167e-05	0	1	1.04167e-05	0.177866	0	0
11	0	process	potassium chloride	solid	1230975	y	Coarse Dust	0.1					0.1	6.25e-05	1230975	1	6.25e-05	0.232925	0	0
11	0	output	potassium	solid	644403	n	Coarse Dust	0.1					0.1	1.04167e-05	0	1	1.04167e-05	0.177866	0.25	0.0444666
11	0	output	chlorine (Cl2)	gas	586572	n							1	0.000104167	0	1	0.000104167	0.251541	0.25	0.0628852
12	upstream: potassium hydroxide 2	input	potassium	solid	644403	n	Coarse Dust	0.1					0.1	1.04167e-05	0	1	1.04167e-05	0.177866	0.25	0.0444666
12	0	input	water	liquid	297416	n			373.15	293.15	-2.89272	5615.98	0.187199	1.94999e-05	0	1	1.94999e-05	0.19547	0	0
12	0	process	potassium	solid	644403	y	Coarse Dust	0.1					0.1	6.25e-05	941819	0.684211	4.27632e-05	0.219994	0.25	0.0549985
12	0	process	water	liquid	297416	y			373.15	293.15	-2.89272	5615.98	0.187199	0.000117	941819	0.315789	3.69472e-05	0.215206	0	0
12	0	output	potassium hydroxide	solid	925296	n	Coarse Dust	0.1					0.1	1.04167e-05	0	1	1.04167e-05	0.177866	0.25	0.0444666
12	0	output	hydrogen	gas	16523	n							1	0.000104167	0	1	0.000104167	0.251541	0.0625	0.0157213
13	fixed-bed reactor	input	propylene	gas	9858784	n							1	0.000104167	0	1	0.000104167	0.251541	0.0625	0.0157213
13	0	input	air	gas	54279544	n							1	0.000104167	0	1	0.000104167	0.251541	0	0
13	0	input	catalyst, metal oxyde	solid	1	n	Granules or flakes	0.03					0.03	3.125e-06	0	1	3.125e-06	0.148386	0	0
13	0	process	catalyst, metal oxyde	solid	1	y	Granules or flakes	0.03					0.03	1.875e-05	79510603	1.25769e-08	2.35818e-13	0.0125714	0	0
13	0	process	acrolein	gas	10507240	y							1	0.000625	79510603	0.132149	8.25931e-05	0.242906	0.5	0.121453
13	0	process	sewage	gas	67512057	y							1	0.000625	79510603	0.849095	0.000530684	0.321395	0	0
13	0	process	acetic acid	gas	140689	y							1	0.000625	79510603	0.00176944	1.1059e-06	0.126908	0.25	0.0317271
13	0	process	acrylic acid	gas	1350616	y							1	0.000625	79510603	0.0169866	1.06166e-05	0.178376	0.25	0.044594
13	0	output	catalyst, metal oxyde	solid	1	y	Granules or flakes	0.03					0.03	3.125e-06	79510603	1.25769e-08	3.93029e-14	0.00959975	0	0
13	0	output	acrolein	gas	10507240	y							1	0.000104167	79510603	0.132149	1.37655e-05	0.185488	0.5	0.0927439
13	0	output	sewage	gas	67512057	y							1	0.000104167	79510603	0.849095	8.84474e-05	0.245423	0	0
13	0	output	acetic acid	gas	140689	y							1	0.000104167	79510603	0.00176944	1.84316e-07	0.0969095	0.25	0.0242274
13	0	output	acrylic acid	gas	1350616	y							1	0.000104167	79510603	0.0169866	1.76944e-06	0.136211	0.25	0.0340528
14	quench	input	acrolein	gas	10507240	y							1	0.000104167	79510602	0.132149	1.37655e-05	0.185488	0.5	0.0927439
14	0	input	sewage	gas	67512057	y							1	0.000104167	79510602	0.849095	8.84474e-05	0.245423	0	0
14	0	input	acetic acid	gas	140689	y							1	0.000104167	79510602	0.00176944	1.84316e-07	0.0969095	0.25	0.0242274
14	0	input	acrylic acid	gas	1350616	y							1	0.000104167	79510602	0.0169866	1.76944e-06	0.136211	0.25	0.0340528
14	0	process	acrolein	gas	10507240	y							1	0.000625	79510602	0.132149	8.25931e-05	0.242906	0.5	0.121453
14	0	process	sewage	gas	67512057	y							1	0.000625	79510602	0.849095	0.000530684	0.321395	0	0
14	0	process	acetic acid	gas	140689	y							1	0.000625	79510602	0.00176944	1.1059e-06	0.126908	0.25	0.0317271
14	0	process	acrylic acid	gas	1350616	y							1	0.000625	79510602	0.0169866	1.06166e-05	0.178376	0.25	0.044594
14	0	output	acrolein	gas	10507240	y							1	0.000104167	88667226	0.118502	1.2344e-05	0.182469	0.5	0.0912347
14	0	output	sewage	liquid	67512057	y			373.15	343.15	-0.926708	40110	1.337	0.000139271	88667226	0.761409	0.000106042	0.252217	0	0
14	0	output	acetic acid	liquid	140689	y			391.15	343.15	-1.48273	23002.4	0.766748	7.98695e-05	88667226	0.00158671	1.2673e-07	0.0915967	0.25	0.0228992
14	0	output	acrylic acid	liquid	10507240	y			414.15	343.15	-2.19321	11303.6	0.376787	3.92487e-05	88667226	0.118502	4.65105e-06	0.157538	0.25	0.0393846
15	gas purification	input	acrolein	gas	10507240	y							1	0.000104167	79510602	0.132149	1.37655e-05	0.185488	0.5	0.0927439
15	0	input	sewage	liquid	67512057	y			373.15	343.15	-0.926708	40110	1.337	0.000139271	79510602	0.849095	0.000118254	0.256389	0	0
15	0	input	acetic acid	liquid	140689	y			391.15	343.15	-1.48273	23002.4	0.766748	7.98695e-05	79510602	0.00176944	1.41324e-07	0.0931118	0.25	0.023278
15	0	input	acrylic acid	liquid	1350616	y			414.15	343.15	-2.19321	11303.6	0.376787	3.92487e-05	79510602	0.0169866	6.66702e-07	0.1176	0.25	0.0294001
15	0	process	acrolein	gas	10507240	y							1	0.000625	79510602	0.132149	8.25931e-05	0.242906	0.5	0.121453
15	0	process	sewage	liquid	67512057	y			373.15	343.15	-0.926708	40110	1.337	0.000835624	79510602	0.849095	0.000709524	0.335756	0	0
15	0	process	acetic acid	liquid	140689	y			391.15	343.15	-1.48273	23002.4	0.766748	0.000479217	79510602	0.00176944	8.47945e-07	0.121935	0.25	0.0304837
15	0	process	acrylic acid	liquid	1350616	y			414.15	343.15	-2.19321	11303.6	0.376787	0.000235492	79510602	0.0169866	4.00021e-06	0.154004	0.25	0.0385011
15	0	output	acrolein	gas	10507240	n							1	0.000104167	69003362	0.152271	1.58616e-05	0.189487	0.5	0.0947437
15	0	output	sewage	liquid	67512057	y			373.15	343.15	-0.926708	40110	1.337	0.000139271	69003362	0.978388	0.000136261	0.261918	0	0
15	0	output	acetic acid	liquid	140689	y			391.15	343.15	-1.48273	23002.4	0.766748	7.98695e-05	69003362	0.00203887	1.62844e-07	0.0951195	0.25	0.0237799
15	0	output	acrylic acid	liquid	1350616	y			414.15	343.15	-2.19321	11303.6	0.376787	3.92487e-05	69003362	0.0195732	7.68222e-07	0.120136	0.25	0.0300341
16	adsorption	input	acrolein	liquid	10507240	n			325.15	288.15	-1.3611	25977.6	0.865922	9.02002e-05	0	1	9.02002e-05	0.246149	0.5	0.123074
16	0	input	water	liquid	42723665	n			373.15	288.15	-3.12684	4443.71	0.148124	1.54295e-05	0	1	1.54295e-05	0.188701	0	0
16	0	process	acrolein	liquid	10507240	y			325.15	288.15	-1.3611	25977.6	0.865922	0.000541201	53230905	0.19739	0.000106828	0.252498	0.5	0.126249
16	0	process	water	liquid	42723665	y			373.15	288.15	-3.12684	4443.71	0.148124	9.25773e-05	53230905	0.80261	7.43035e-05	0.23907	0	0
16	0	output	carbon dioxide	gas	1214802	y							1	0.000104167	48592095	0.025	2.60417e-06	0.144369	0	0
16	0	output	carbon monoxide	gas	1214802	y							1	0.000104167	48592095	0.025	2.60417e-06	0.144369	0.5	0.0721846
16	0	output	nitrogen	gas	41303282	y							1	0.000104167	48592095	0.85	8.85417e-05	0.245462	0	0
16	0	output	oxygen	gas	4859209	y							1	0.000104167	48592095	0.1	1.04167e-05	0.177866	0.0625	0.0111166
16	0	output	acrolein	liquid	10507240	n			325.15	288.15	-1.3611	25977.6	0.865922	9.02002e-05	48592095	0.216234	1.95043e-05	0.195476	0.5	0.0977381
17	combustion	input	carbon dioxide	gas	1214802	n							1	0.000104167	0	1	0.000104167	0.251541	0	0
17	0	input	carbon monoxide	gas	1214802	n							1	0.000104167	0	1	0.000104167	0.251541	0.5	0.12577
17	0	input	nitrogen	gas	41303282	n							1	0.000104167	0	1	0.000104167	0.251541	0	0
17	0	input	oxygen	gas	4859209	n							1	0.000104167	0	1	0.000104167	0.251541	0.0625	0.0157213
17	0	output	carbon dioxide	gas	2429604	y							1	0.000104167	48592362	0.0499997	5.2083e-06	0.160245	0	0
17	0	output	carbon monoxide	gas	242	y							1	0.000104167	48592362	4.98021e-06	5.18772e-10	0.0400373	0.5	0.0200186
17	0	output	dinitrogen monoxide	gas	24	y							1	0.000104167	48592362	4.93905e-07	5.14484e-11	0.0282753	0.0625	0.00176721
17	0	output	oxygen	gas	4859209	y							1	0.000104167	48592362	0.0999994	1.04166e-05	0.177866	0.0625	0.0111166
17	0	output	nitrogen	gas	41303283	y							1	0.000104167	48592362	0.849995	8.85412e-05	0.245462	0	0
18	desorption	input	acrolein	liquid	10507240	y			325.15	293.15	-1.15709	31856.7	1.06189	0.000110613	53230905	0.19739	2.1834e-05	0.198824	0.5	0.0994122
18	0	input	water	liquid	42723665	y			373.15	293.15	-2.89272	5615.98	0.187199	1.94999e-05	53230905	0.80261	1.56508e-05	0.189106	0	0
18	0	process	acrolein	liquid	10507240	y			325.15	293.15	-1.15709	31856.7	1.06189	0.00066368	53230905	0.19739	0.000131004	0.260371	0.5	0.130186
18	0	process	water	liquid	42723665	y			373.15	293.15	-2.89272	5615.98	0.187199	0.000117	53230905	0.80261	9.39051e-05	0.247645	0	0
18	0	output	acrolein	liquid	10507240	n			325.15	293.15	-1.15709	31856.7	1.06189	0.000110613	0	1	0.000110613	0.253825	0.5	0.126912
18	0	output	water	liquid	42723665	n			373.15	293.15	-2.89272	5615.98	0.187199	1.94999e-05	0	1	1.94999e-05	0.19547	0	0
19	compressor	input	acetylene	gas	4596722	n							1	0.000104167	0	1	0.000104167	0.251541	0.0625	0.0157213
19	0	input	methanol	liquid	6805902	n			338.15	293.15	-1.62715	19909.2	0.663639	6.9129e-05	0	1	6.9129e-05	0.236487	0.5	0.118243
19	0	input	nitrogen	gas	4044037	n							1	0.000104167	0	1	0.000104167	0.251541	0	0
19	0	process	acetylene	gas	4596722	y							1	0.000625	15446661	0.297587	0.000185992	0.274475	0.0625	0.0171547
19	0	process	methanol	liquid	6805902	y			338.15	293.15	-1.62715	19909.2	0.663639	0.000414774	15446661	0.440607	0.000182752	0.27375	0.5	0.136875
19	0	process	nitrogen	gas	4044037	y							1	0.000625	15446661	0.261807	0.000163629	0.269234	0	0
19	0	output	acetylene	gas	4596722	y							1	0.000104167	15446661	0.297587	3.09986e-05	0.209594	0.0625	0.0130996
19	0	output	methanol	liquid	6805902	y			338.15	293.15	-1.62715	19909.2	0.663639	6.9129e-05	15446661	0.440607	3.04587e-05	0.209041	0.5	0.10452
19	0	output	nitrogen	gas	4044037	y							1	0.000104167	15446661	0.261807	2.72715e-05	0.205592	0	0
20	pressure reactor	input	acetylene	gas	4596722	y							1	0.000104167	15446661	0.297587	3.09986e-05	0.209594	0.0625	0.0130996
20	0	input	methanol	gas	6805902	y							1	0.000104167	15446661	0.440607	4.58965e-05	0.222348	0.5	0.111174
20	0	input	nitrogen	gas	4044037	y							1	0.000104167	15446661	0.261807	2.72715e-05	0.205592	0	0
20	0	process	acetylene	gas	4596722	y							1	0.000625	15665005	0.293439	0.000183399	0.273896	0.0625	0.0171185
20	0	process	methanol	gas	6805902	y							1	0.000625	15665005	0.434465	0.000271541	0.290562	0.5	0.145281
20	0	process	nitrogen	gas	4044037	y							1	0.000625	15665005	0.258157	0.000161348	0.268665	0	0
20	0	process	catalyst	solid	218344	y	0	#N/A					#N/A	#N/A	15665005	0.0139383		#VALUE!	0	0
20	0	output	methylvinylether	gas	9252969	n							1	0.000104167	0	1	0.000104167	0.251541	0.0625	0.0157213
20	0	output	catalyst	solid	218344	n	0	#N/A					#N/A	#N/A	0	1		#VALUE!	0	0
20	0	output	emissions, air unspec.	gas	3882275	n							1	0.000104167	0	1	0.000104167	0.251541	0	0
20	0	output	acetylene	gas	45967	n							1	0.000104167	0	1	0.000104167	0.251541	0.0625	0.0157213
20	0	output	nitrogen	gas	4044037	n							1	0.000104167	0	1	0.000104167	0.251541	0	0
20	0	output	methanol	liquid	1701475	n			338.15	293.15	-1.62715	19909.2	0.663639	6.9129e-05	0	1	6.9129e-05	0.236487	0.5	0.118243
21	condenser	input	methylvinylether	gas	9252969	y							1	0.000104167	18926723	0.488884	5.09254e-05	0.225855	0.0625	0.0141159
21	0	input	emissions, air unspec.	gas	3882275	y							1	0.000104167	18926723	0.205121	2.13668e-05	0.198178	0	0
21	0	input	acetylene	gas	45967	y							1	0.000104167	18926723	0.00242868	2.52988e-07	0.101641	0.0625	0.00635254
21	0	input	nitrogen	gas	4044037	y							1	0.000104167	18926723	0.213668	2.22571e-05	0.1994	0	0
21	0	input	methanol	liquid	1701475	y			338.15	293.15	-1.62715	19909.2	0.663639	6.9129e-05	18926723	0.089898	6.21456e-06	0.164562	0.5	0.0822811
21	0	process	emissions, air unspec.	gas	3882275	y							1	0.000625	18926723	0.205121	0.000128201	0.259525	0	0
21	0	process	acetylene	gas	45967	y							1	0.000625	18926723	0.00242868	1.51793e-06	0.133104	0.0625	0.008319
21	0	process	nitrogen	gas	4044037	y							1	0.000625	18926723	0.213668	0.000133543	0.261125	0	0
21	0	process	methanol	liquid	1701475	y			338.15	293.15	-1.62715	19909.2	0.663639	0.000414774	18926723	0.089898	3.72874e-05	0.215503	0.5	0.107752
21	0	process	methylvinylether	gas	9252969	y							1	0.000625	18926723	0.488884	0.000305552	0.295769	0.0625	0.0184856
21	0	output	emissions, air unspec.	gas	3882275	n							1	0.000104167	11000411	0.352921	3.67626e-05	0.215044	0	0
21	0	output	acetylene	gas	45967	y							1	0.000104167	11000411	0.00417866	4.35277e-07	0.110291	0.0625	0.00689317
21	0	output	nitrogen	gas	161761	n							1	0.000104167	11000411	0.014705	1.53177e-06	0.133286	0	0
21	0	output	methanol	liquid	1701475	y			338.15	293.15	-1.62715	19909.2	0.663639	6.9129e-05	11000411	0.154674	1.06924e-05	0.178567	0.5	0.0892836
21	0	output	methylvinylether	gas	9252969	y							1	0.000104167	11000411	0.841148	8.76195e-05	0.245076	0.0625	0.0153172
22	pressure de-aerator	input	methylvinylether	gas	9252969	y							1	0.000104167	11000411	0.841148	8.76195e-05	0.245076	0.0625	0.0153172
22	0	input	acetylene	gas	45967	y							1	0.000104167	11000411	0.00417866	4.35277e-07	0.110291	0.0625	0.00689317
22	0	input	methanol	liquid	1701475	y			338.15	293.15	-1.62715	19909.2	0.663639	6.9129e-05	11000411	0.154674	1.06924e-05	0.178567	0.5	0.0892836
22	0	process	methylvinylether	gas	9252969	y							1	0.000625	11000411	0.841148	0.000525717	0.32094	0.0625	0.0200588
22	0	process	acetylene	gas	45967	y							1	0.000625	11000411	0.00417866	2.61166e-06	0.144432	0.0625	0.00902698
22	0	process	methanol	liquid	1701475	y			338.15	293.15	-1.62715	19909.2	0.663639	0.000414774	11000411	0.154674	6.41547e-05	0.233843	0.5	0.116922
22	0	output	methylvinylether	gas	9252969	y							1	0.000104167	10954444	0.844677	8.79872e-05	0.24523	0.0625	0.0153269
22	0	output	acetylene	gas	45967	n							1	0.000104167	10954444	0.0041962	4.37104e-07	0.11036	0.0625	0.00689751
22	0	output	methanol	liquid	1701475	y			338.15	293.15	-1.62715	19909.2	0.663639	6.9129e-05	10954444	0.155323	1.07373e-05	0.17868	0.5	0.0893399
23	column	input	methylvinylether	gas	9252969	y							1	0.000104167	9252969	1	0.000104167	0.251541	0.0625	0.0157213
23	0	input	methanol	liquid	1701475	n			338.15	293.15	-1.62715	19909.2	0.663639	6.9129e-05	9252969	0.183884	1.27117e-05	0.183278	0.5	0.0916388
23	0	process	methanol	liquid	1701475	y			338.15	293.15	-1.62715	19909.2	0.663639	0.000414774	10954444	0.155323	6.44239e-05	0.233991	0.5	0.116995
23	0	process	methylvinylether	gas	9252969	y							1	0.000625	10954444	0.844677	0.000527923	0.321142	0.0625	0.0200714
23	0	output	methylvinylether	gas	9252969	n							1	0.000104167	0	1	0.000104167	0.251541	0.0625	0.0157213
23	0	output	methanol	liquid	1701475	n			338.15	293.15	-1.62715	19909.2	0.663639	6.9129e-05	0	1	6.9129e-05	0.236487	0.5	0.118243
24	destillation	input	methanol	liquid	1701475	n			338.15	293.15	-1.62715	19909.2	0.663639	6.9129e-05	0	1	6.9129e-05	0.236487	0.5	0.118243
24	0	input	methylvinylether	gas	9252969	n							1	0.000104167	0	1	0.000104167	0.251541	0.0625	0.0157213
24	0	process	methanol	liquid	1701475	y			338.15	293.15	-1.62715	19909.2	0.663639	0.000414774	10954444	0.155323	6.44239e-05	0.233991	0.5	0.116995
24	0	process	methylvinylether	gas	9252969	y							1	0.000625	10954444	0.844677	0.000527923	0.321142	0.0625	0.0200714
24	0	output	methanol	liquid	1701475	n			338.15	293.15	-1.62715	19909.2	0.663639	6.9129e-05	0	1	6.9129e-05	0.236487	0.5	0.118243
24	0	output	methylvinylether	gas	9252969	n							1	0.000104167	0	1	0.000104167	0.251541	0.0625	0.0157213
25	washing column	input	methylvinylether	gas	9252969	n							1	0.000104167	0	1	0.000104167	0.251541	0.0625	0.0157213
25	0	input	water	liquid	4626484	n			373.15	293.15	-2.89272	5615.98	0.187199	1.94999e-05	0	1	1.94999e-05	0.19547	0	0
25	0	process	methylvinylether	gas	9252969	y							1	0.000625	13879453	0.666667	0.000416667	0.309904	0.0625	0.019369
25	0	process	water	liquid	4626484	y			373.15	293.15	-2.89272	5615.98	0.187199	0.000117	13879453	0.333333	3.89999e-05	0.216965	0	0
25	0	output	methylvinylether	gas	9252969	n							1	0.000104167	0	1	0.000104167	0.251541	0.0625	0.0157213
25	0	output	water	liquid	1850593	n			373.15	293.15	-2.89272	5615.98	0.187199	1.94999e-05	0	1	1.94999e-05	0.19547	0	0
25	0	output	water	liquid	2775890	n			373.15	293.15	-2.89272	5615.98	0.187199	1.94999e-05	0	1	1.94999e-05	0.19547	0	0
26	drying	input	water	liquid	1850593	y			373.15	293.15	-2.89272	5615.98	0.187199	1.94999e-05	12028858	0.153846	2.99999e-06	0.147477	0	0
26	0	input	methylvinylether	gas	9252969	y							1	0.000104167	12028858	0.769231	8.01282e-05	0.241801	0.0625	0.0151126
26	0	input	potassium hydroxide	solid	925296	y	Coarse Dust	0.1					0.1	1.04167e-05	12028858	0.076923	8.01281e-07	0.120901	0.25	0.0302251
26	0	process	water	liquid	1850593	y			373.15	293.15	-2.89272	5615.98	0.187199	0.000117	12028858	0.153846	1.79999e-05	0.193129	0	0
26	0	process	methylvinylether	gas	9252969	y							1	0.000625	12028858	0.769231	0.000480769	0.316652	0.0625	0.0197907
26	0	process	potassium hydroxide	solid	925296	y	Coarse Dust	0.1					0.1	6.25e-05	12028858	0.076923	4.80769e-06	0.158326	0.25	0.0395814
26	0	output	water	liquid	1850593	n			373.15	293.15	-2.89272	5615.98	0.187199	1.94999e-05	0	1	1.94999e-05	0.19547	0	0
26	0	output	methylvinylether	gas	9252969	n							1	0.000104167	0	1	0.000104167	0.251541	0.0625	0.0157213
26	0	output	potassium hydroxide	solid	925296	n	Coarse Dust	0.1					0.1	1.04167e-05	0	1	1.04167e-05	0.177866	0.25	0.0444666
27	tubular reactor	input	methylvinylether	gas	9252969	n							1	0.000104167	0	1	0.000104167	0.251541	0.0625	0.0157213
27	0	input	acrolein	gas	10507240	n							1	0.000104167	0	1	0.000104167	0.251541	0.5	0.12577
27	0	process	methylvinylether	gas	9252969	y							1	0.000625	19760209	0.468263	0.000292664	0.293857	0.0625	0.018366
27	0	process	acrolein	gas	10507240	y							1	0.000625	19760209	0.531737	0.000332336	0.299533	0.5	0.149767
27	0	output	methylvinylether	gas	6168646	y							1	0.000104167	25520240	0.241716	2.51787e-05	0.203136	0.0625	0.012696
27	0	output	acrolein	gas	1167471	y							1	0.000104167	25520240	0.0457469	4.7653e-06	0.158115	0.5	0.0790574
27	0	output	MDP	gas	18184123	y							1	0.000104167	25520240	0.712537	7.42226e-05	0.239031	0.125	0.0298788
28	processing MDP	input	methylvinylether	gas	6168646	y							1	0.000104167	25520240	0.241716	2.51787e-05	0.203136	0.0625	0.012696
28	0	input	acrolein	gas	1167471	y							1	0.000104167	25520240	0.0457469	4.7653e-06	0.158115	0.5	0.0790574
28	0	input	MDP	gas	18184123	y							1	0.000104167	25520240	0.712537	7.42226e-05	0.239031	0.125	0.0298788
28	0	process	methylvinylether	gas	6168646	y							1	0.000625	25520240	0.241716	0.000151072	0.266017	0.0625	0.0166261
28	0	process	acrolein	gas	1167471	y							1	0.000625	25520240	0.0457469	2.85918e-05	0.20706	0.5	0.10353
28	0	process	MDP	gas	18184123	y							1	0.000625	25520240	0.712537	0.000445336	0.313024	0.125	0.039128
28	0	output	methylvinylether	gas	6168646	n							1	0.000104167	19351594	0.318767	3.32049e-05	0.211775	0.0625	0.0132359
28	0	output	acrolein	liquid	1167471	y			325.15	293.15	-1.15709	31856.7	1.06189	0.000110613	19351594	0.0603294	6.67324e-06	0.166336	0.5	0.0831678
28	0	output	MDP	liquid	18184123	y			400.25	293.15	-3.87262	2107.93	0.0702645	7.31921e-06	19351594	0.939671	6.87765e-06	0.167093	0.125	0.0208866
29	reactor	input	MDP	liquid	18184123	n			400.25	293.15	-3.87262	2107.93	0.0702645	7.31921e-06	0	1	7.31921e-06	0.168665	0.125	0.0210831
29	0	input	phosphoric acid	liquid	71691	n			486.15	293.15	-6.97868	94.3875	0.00314625	3.27734e-07	0	1	3.27734e-07	0.105679	0.25	0.0264198
29	0	input	water	liquid	14338278	n			373.15	293.15	-2.89272	5615.98	0.187199	1.94999e-05	0	1	1.94999e-05	0.19547	0	0
29	0	process	MDP	liquid	18184123	y			400.25	293.15	-3.87262	2107.93	0.0702645	4.39153e-05	32594092	0.557896	2.45002e-05	0.202302	0.125	0.0252878
29	0	process	phosphoric acid	liquid	71691	y			486.15	293.15	-6.97868	94.3875	0.00314625	1.96641e-06	32594092	0.00219951	4.32513e-09	0.0550925	0.25	0.0137731
29	0	process	water	liquid	14338278	y			373.15	293.15	-2.89272	5615.98	0.187199	0.000117	32594092	0.439904	5.14686e-05	0.226216	0	0
29	0	output	glutaraldehyde	liquid	15000000	n			461.15	293.15	-6.07471	233.08	0.00776934	8.09306e-07	0	1	8.09306e-07	0.121082	1	0.121082
29	0	output	MDP	liquid	181841	n			400.25	293.15	-3.87262	2107.93	0.0702645	7.31921e-06	0	1	7.31921e-06	0.168665	0.125	0.0210831
29	0	output	water	liquid	14338278	n			373.15	293.15	-2.89272	5615.98	0.187199	1.94999e-05	0	1	1.94999e-05	0.19547	0	0
29	0	output	byproducts	liquid	898616	n			373.15	293.15	-2.89272	5615.98	0.187199	1.94999e-05	0	1	1.94999e-05	0.19547	0	0
29	0	output	methanol	liquid	4800719	n			338.15	293.15	-1.62715	19909.2	0.663639	6.9129e-05	0	1	6.9129e-05	0.236487	0.5	0.118243
30	neutralization	input	glutaraldehyde	liquid	15000000	y			461.15	363.15	-2.86053	5799.71	0.193324	2.01379e-05	35307232	0.424842	8.55541e-06	0.172674	1	0.172674
30	0	input	MDP	liquid	181841	y			400.25	363.15	-1.08291	34309.4	1.14365	0.00011913	35307232	0.00515025	6.13549e-07	0.116139	0.125	0.0145174
30	0	input	water	liquid	14338278	y			373.15	303.15	-2.44763	8764.42	0.292147	3.0432e-05	35307232	0.4061	1.23584e-05	0.182502	0	0
30	0	input	byproducts	liquid	898616	y			373.15	363.15	-0.29189	75674.6	2.52249	0.000262759	35307232	0.0254513	6.68757e-06	0.166389	0	0
30	0	input	methanol	gas	4800719	y							1	0.000104167	35307232	0.13597	1.41635e-05	0.186285	0.5	0.0931426
30	0	input	sodium hydroxide	solid	87778	y	Firm granules or flakes	0.01					0.01	1.04167e-06	35307232	0.00248612	2.58971e-09	0.0509994	0.25	0.0127499
30	0	process	glutaraldehyde	liquid	15000000	y			461.15	363.15	-2.86053	5799.71	0.193324	0.000120827	35307232	0.424842	5.13325e-05	0.226126	1	0.226126
30	0	process	MDP	liquid	181841	y			400.25	363.15	-1.08291	34309.4	1.14365	0.000714779	35307232	0.00515025	3.68129e-06	0.15209	0.125	0.0190113
30	0	process	water	liquid	14338278	y			373.15	363.15	-0.29189	75674.6	2.52249	0.00157655	35307232	0.4061	0.000640239	0.330603	0	0
30	0	process	byproducts	liquid	898616	y			373.15	363.15	-0.29189	75674.6	2.52249	0.00157655	35307232	0.0254513	4.01254e-05	0.217896	0	0
30	0	process	methanol	gas	4800719	y							1	0.000625	35307232	0.13597	8.49812e-05	0.243951	0.5	0.121975
30	0	process	sodium hydroxide	solid	87778	y	Firm granules or flakes	0.01					0.01	6.25e-06	35307232	0.00248612	1.55382e-08	0.0667865	0.25	0.0166966
30	0	output	glutaraldehyde	liquid	15000000	y			461.15	363.15	-2.86053	5799.71	0.193324	2.01379e-05	35219454	0.425901	8.57674e-06	0.172738	1	0.172738
30	0	output	MDP	liquid	181841	y			400.25	363.15	-1.08291	34309.4	1.14365	0.00011913	35219454	0.00516308	6.15078e-07	0.116183	0.125	0.0145228
30	0	output	water	liquid	14338278	y			373.15	363.15	-0.29189	75674.6	2.52249	0.000262759	35219454	0.407112	0.000106972	0.252549	0	0
30	0	output	byproducts	liquid	898616	y			373.15	363.15	-0.29189	75674.6	2.52249	0.000262759	35219454	0.0255148	6.70424e-06	0.166452	0	0
30	0	output	methanol	gas	4800719	y							1	0.000104167	35219454	0.136309	1.41988e-05	0.186355	0.5	0.0931776
30	0	output	sodium phosphate	solid	119929	n	Granules or flakes	0.03					0.03	3.125e-06	35219454	0.00340519	1.06412e-08	0.0630874	0.25	0.0157719
31	processing glutaraldehyde	input	glutaraldehyde	liquid	15000000	y			461.15	363.15	-2.86053	5799.71	0.193324	2.01379e-05	32561941	0.46066	9.27672e-06	0.17479	1	0.17479
31	0	input	MDP	liquid	181841	y			400.25	363.15	-1.08291	34309.4	1.14365	0.00011913	32561941	0.00558446	6.65277e-07	0.117563	0.125	0.0146953
31	0	input	water	liquid	11680765	y			373.15	363.15	-0.29189	75674.6	2.52249	0.000262759	32561941	0.358724	9.42581e-05	0.247785	0	0
31	0	input	byproducts	liquid	898616	y			373.15	363.15	-0.29189	75674.6	2.52249	0.000262759	32561941	0.0275971	7.2514e-06	0.168429	0	0
31	0	input	methanol	gas	4800719	y							1	0.000104167	32561941	0.147433	1.53577e-05	0.188569	0.5	0.0942844
31	0	process	glutaraldehyde	liquid	15000000	y			461.15	363.15	-2.86053	5799.71	0.193324	0.000120827	32561941	0.46066	5.56603e-05	0.228897	1	0.228897
31	0	process	MDP	liquid	181841	y			400.25	363.15	-1.08291	34309.4	1.14365	0.000714779	32561941	0.00558446	3.99166e-06	0.153955	0.125	0.0192443
31	0	process	water	liquid	11680765	y			373.15	363.15	-0.29189	75674.6	2.52249	0.00157655	32561941	0.358724	0.000565549	0.324488	0	0
31	0	process	byproducts	liquid	898616	y			373.15	363.15	-0.29189	75674.6	2.52249	0.00157655	32561941	0.0275971	4.35084e-05	0.220567	0	0
31	0	process	methanol	gas	4800719	y							1	0.000625	32561941	0.147433	9.21459e-05	0.246941	0.5	0.12347
31	0	output	glutaraldehyde	liquid	15000000	n			461.15	293.15	-6.07471	233.08	0.00776934	8.09306e-07	17561941	0.85412	6.91244e-07	0.118242	1	0.118242
31	0	output	MDP	liquid	181841	y			400.25	293.15	-3.87262	2107.93	0.0702645	7.31921e-06	17561941	0.0103543	7.57851e-08	0.0847755	0.125	0.0105969
31	0	output	water	liquid	11680765	y			373.15	293.15	-2.89272	5615.98	0.187199	1.94999e-05	17561941	0.665118	1.29698e-05	0.183833	0	0
31	0	output	byproducts	liquid	898616	y			373.15	293.15	-2.89272	5615.98	0.187199	1.94999e-05	17561941	0.0511684	9.9778e-07	0.124958	0	0
31	0	output	methanol	liquid	4800719	y			338.15	293.15	-1.62715	19909.2	0.663639	6.9129e-05	17561941	0.273359	1.88971e-05	0.194548	0.5	0.0972739
0	0	0	0	#N/A	0	n	#N/A	#N/A	#N/A	#N/A	#N/A	#N/A	#N/A	#N/A	0	1		#N/A	0	0
0	0	0	0	#N/A	0	n	#N/A	#N/A	#N/A	#N/A	#N/A	#N/A	#N/A	#N/A	0	1		#N/A	0	0
0	0	0	0	#N/A	0	n	#N/A	#N/A	#N/A	#N/A	#N/A	#N/A	#N/A	#N/A	0	1		#N/A	0	0
0	0	0	0	#N/A	0	n	#N/A	#N/A	#N/A	#N/A	#N/A	#N/A	#N/A	#N/A	0	1		#N/A	0	0
0	0	0	0	#N/A	0	n	#N/A	#N/A	#N/A	#N/A	#N/A	#N/A	#N/A	#N/A	0	1		#N/A	0	0
0	0	0	0	#N/A	0	n	#N/A	#N/A	#N/A	#N/A	#N/A	#N/A	#N/A	#N/A	0	1		#N/A	0	0
0	0	0	0	#N/A	0	n	#N/A	#N/A	#N/A	#N/A	#N/A	#N/A	#N/A	#N/A	0	1		#N/A	0	0
0	0	0	0	#N/A	0	n	#N/A	#N/A	#N/A	#N/A	#N/A	#N/A	#N/A	#N/A	0	1		#N/A	0	0
0	0	0	0	#N/A	0	n	#N/A	#N/A	#N/A	#N/A	#N/A	#N/A	#N/A	#N/A	0	1		#N/A	0	0
0	0	0	0	#N/A	0	n	#N/A	#N/A	#N/A	#N/A	#N/A	#N/A	#N/A	#N/A	0	1		#N/A	0	0
0	0	0	0	#N/A	0	n	#N/A	#N/A	#N/A	#N/A	#N/A	#N/A	#N/A	#N/A	0	1		#N/A	0	0
0	0	0	0	#N/A	0	n	#N/A	#N/A	#N/A	#N/A	#N/A	#N/A	#N/A	#N/A	0	1		#N/A	0	0
0	0	0	0	#N/A	0	n	#N/A	#N/A	#N/A	#N/A	#N/A	#N/A	#N/A	#N/A	0	1		#N/A	0	0
0	0	0	0	#N/A	0	n	#N/A	#N/A	#N/A	#N/A	#N/A	#N/A	#N/A	#N/A	0	1		#N/A	0	0
0	0	0	0	#N/A	0	n	#N/A	#N/A	#N/A	#N/A	#N/A	#N/A	#N/A	#N/A	0	1		#N/A	0	0
0	0	0	0	#N/A	0	n	#N/A	#N/A	#N/A	#N/A	#N/A	#N/A	#N/A	#N/A	0	1		#N/A	0	0
0	0	0	0	#N/A	0	n	#N/A	#N/A	#N/A	#N/A	#N/A	#N/A	#N/A	#N/A	0	1		#N/A	0	0
0	0	0	0	#N/A	0	n	#N/A	#N/A	#N/A	#N/A	#N/A	#N/A	#N/A	#N/A	0	1		#N/A	0	0
0	0	0	0	#N/A	0	n	#N/A	#N/A	#N/A	#N/A	#N/A	#N/A	#N/A	#N/A	0	1		#N/A	0	0
0	0	0	0	#N/A	0	n	#N/A	#N/A	#N/A	#N/A	#N/A	#N/A	#N/A	#N/A	0	1		#N/A	0	0
0	0	0	0	#N/A	0	n	#N/A	#N/A	#N/A	#N/A	#N/A	#N/A	#N/A	#N/A	0	1		#N/A	0	0
0	0	0	0	#N/A	0	n	#N/A	#N/A	#N/A	#N/A	#N/A	#N/A	#N/A	#N/A	0	1		#N/A	0	0
0	0	0	0	#N/A	0	n	#N/A	#N/A	#N/A	#N/A	#N/A	#N/A	#N/A	#N/A	0	1		#N/A	0	0
0	0	0	0	#N/A	0	n	#N/A	#N/A	#N/A	#N/A	#N/A	#N/A	#N/A	#N/A	0	1		#N/A	0	0
0	0	0	0	#N/A	0	n	#N/A	#N/A	#N/A	#N/A	#N/A	#N/A	#N/A	#N/A	0	1		#N/A	0	0
0	0	0	0	#N/A	0	n	#N/A	#N/A	#N/A	#N/A	#N/A	#N/A	#N/A	#N/A	0	1		#N/A	0	0
0	0	0	0	#N/A	0	n	#N/A	#N/A	#N/A	#N/A	#N/A	#N/A	#N/A	#N/A	0	1		#N/A	0	0
0	0	0	0	#N/A	0	n	#N/A	#N/A	#N/A	#N/A	#N/A	#N/A	#N/A	#N/A	0	1		#N/A	0	0
0	0	0	0	#N/A	0	n	#N/A	#N/A	#N/A	#N/A	#N/A	#N/A	#N/A	#N/A	0	1		#N/A	0	0
0	0	0	0	#N/A	0	n	#N/A	#N/A	#N/A	#N/A	#N/A	#N/A	#N/A	#N/A	0	1		#N/A	0	0
0	0	0	0	#N/A	0	n	#N/A	#N/A	#N/A	#N/A	#N/A	#N/A	#N/A	#N/A	0	1		#N/A	0	0
0	0	0	0	#N/A	0	n	#N/A	#N/A	#N/A	#N/A	#N/A	#N/A	#N/A	#N/A	0	1		#N/A	0	0
0	0	0	0	#N/A	0	n	#N/A	#N/A	#N/A	#N/A	#N/A	#N/A	#N/A	#N/A	0	1		#N/A	0	0
0	0	0	0	#N/A	0	n	#N/A	#N/A	#N/A	#N/A	#N/A	#N/A	#N/A	#N/A	0	1		#N/A	0	0
0	0	0	0	#N/A	0	n	#N/A	#N/A	#N/A	#N/A	#N/A	#N/A	#N/A	#N/A	0	1		#N/A	0	0
0	0	0	0	#N/A	0	n	#N/A	#N/A	#N/A	#N/A	#N/A	#N/A	#N/A	#N/A	0	1		#N/A	0	0
0	0	0	0	#N/A	0	n	#N/A	#N/A	#N/A	#N/A	#N/A	#N/A	#N/A	#N/A	0	1		#N/A	0	0
0	0	0	0	#N/A	0	n	#N/A	#N/A	#N/A	#N/A	#N/A	#N/A	#N/A	#N/A	0	1		#N/A	0	0
0	0	0	0	#N/A	0	n	#N/A	#N/A	#N/A	#N/A	#N/A	#N/A	#N/A	#N/A	0	1		#N/A	0	0
0	0	0	0	#N/A	0	n	#N/A	#N/A	#N/A	#N/A	#N/A	#N/A	#N/A	#N/A	0	1		#N/A	0	0
0	0	0	0	#N/A	0	n	#N/A	#N/A	#N/A	#N/A	#N/A	#N/A	#N/A	#N/A	0	1		#N/A	0	0

## Sheet: Production-Scores
								exposure duration				Score	frequency Score			Handling Score			imission reduction Score			personal protection (PPE)				inspection		cleaning		background	local controls			Room size		index	Ventilation		index	general ventilation
Step	Name	In/Out	Substance	mass (kg)	temperature (°C)	Mix?	default?	min/h	default?	value	default?	th	entry?	default?	fh	entry	default	H	entry?	default?	Score	entry?	default?	Score	(eta)imm	entry?	default?	entry?	default?	a	entry?	default?	(eta)lc	entry?	default?	row	entry?	default?	column	(eta)gv
1	upstream: propylene	input	propane	10332043	0	0	n	0	min	0	5	0.0104167	0	4-5 days a week	1	0	closed containers	0	0	no cabin	1	0	None	1	1	0	regular inspections	0	No daily cleaning	0.01	0	no control measures	1	0	>1000 m3	3	0	Mechanical/ natural ventilation	2	1.1
1	0	input	oxygen	3748587	0	0	n	0	min	0	5	0.0104167	0	4-5 days a week	1	0	closed containers	0	0	no cabin	1	0	None	1	1	0	regular inspections	0	No daily cleaning	0.01	0	no control measures	1	0	>1000 m3	3	0	Mechanical/ natural ventilation	2	1.1
1	0	process	propane	10332043	400	y	y	0	min	0	30	0.0625	0	4-5 days a week	1	0	closed containers	0	0	no cabin	1	0	None	1	1	0	regular inspections	0	No daily cleaning	0.01	0	no control measures	1	0	>1000 m3	3	0	Mechanical/ natural ventilation	2	1.1
1	0	process	oxygen	3748587	400	y	y	0	min	0	30	0.0625	0	4-5 days a week	1	0	closed containers	0	0	no cabin	1	0	None	1	1	0	regular inspections	0	No daily cleaning	0.01	0	no control measures	1	0	>1000 m3	3	0	Mechanical/ natural ventilation	2	1.1
1	0	output	propylene	9858784	0	0	n	0	min	0	5	0.0104167	0	4-5 days a week	1	0	closed containers	0	0	no cabin	1	0	None	1	1	0	regular inspections	0	No daily cleaning	0.01	0	no control measures	1	0	>1000 m3	3	0	Mechanical/ natural ventilation	2	1.1
1	0	output	water	4221846	0	0	n	0	min	0	5	0.0104167	0	4-5 days a week	1	0	closed containers	0	0	no cabin	1	0	None	1	1	0	regular inspections	0	No daily cleaning	0.01	0	no control measures	1	0	>1000 m3	3	0	Mechanical/ natural ventilation	2	1.1
2	upstream: methanol	input	natural gas	2555399	0	0	n	0	min	0	5	0.0104167	0	4-5 days a week	1	0	closed containers	0	0	no cabin	1	0	None	1	1	0	regular inspections	0	No daily cleaning	0.01	0	no control measures	1	0	>1000 m3	3	0	Mechanical/ natural ventilation	2	1.1
2	0	input	oxygen	2549027	0	0	n	0	min	0	5	0.0104167	0	4-5 days a week	1	0	closed containers	0	0	no cabin	1	0	None	1	1	0	regular inspections	0	No daily cleaning	0.01	0	no control measures	1	0	>1000 m3	3	0	Mechanical/ natural ventilation	2	1.1
2	0	process	carbon monoxide	2549027	900	y	y	min	min	5	5	0.0104167	0	4-5 days a week	1	0	closed containers	0	0	no cabin	1	0	None	1	1	0	regular inspections	0	No daily cleaning	0.01	0	no control measures	1	0	>1000 m3	3	0	Mechanical/ natural ventilation	2	1.1
2	0	process	hydrogen	637256	900	y	y	min	min	5	5	0.0104167	0	4-5 days a week	1	0	closed containers	0	0	no cabin	1	0	None	1	1	0	regular inspections	0	No daily cleaning	0.01	0	no control measures	1	0	>1000 m3	3	0	Mechanical/ natural ventilation	2	1.1
2	0	output	carbon monoxide	2549027	0	0	n	0	min	0	5	0.0104167	0	4-5 days a week	1	0	closed containers	0	0	no cabin	1	0	None	1	1	0	regular inspections	0	No daily cleaning	0.01	0	no control measures	1	0	>1000 m3	3	0	Mechanical/ natural ventilation	2	1.1
2	0	output	hydrogen	637256	0	0	n	0	min	0	5	0.0104167	0	4-5 days a week	1	0	closed containers	0	0	no cabin	1	0	None	1	1	0	regular inspections	0	No daily cleaning	0.01	0	no control measures	1	0	>1000 m3	3	0	Mechanical/ natural ventilation	2	1.1
3	upstream: methanol 2	input	carbon monoxide	2549027	0	0	n	0	min	0	5	0.0104167	0	4-5 days a week	1	0	closed containers	0	0	no cabin	1	0	None	1	1	0	regular inspections	0	No daily cleaning	0.01	0	no control measures	1	0	>1000 m3	3	0	Mechanical/ natural ventilation	2	1.1
3	0	input	hydrogen	637256	0	0	n	0	min	0	5	0.0104167	0	4-5 days a week	1	0	closed containers	0	0	no cabin	1	0	None	1	1	0	regular inspections	0	No daily cleaning	0.01	0	no control measures	1	0	>1000 m3	3	0	Mechanical/ natural ventilation	2	1.1
3	0	process	carbon monoxide	2549027	250	y	y	0	min	0	30	0.0625	0	4-5 days a week	1	0	closed containers	0	0	no cabin	1	0	None	1	1	0	regular inspections	0	No daily cleaning	0.01	0	no control measures	1	0	>1000 m3	3	0	Mechanical/ natural ventilation	2	1.1
3	0	process	hydrogen	637256	250	y	y	0	min	0	30	0.0625	0	4-5 days a week	1	0	closed containers	0	0	no cabin	1	0	None	1	1	0	regular inspections	0	No daily cleaning	0.01	0	no control measures	1	0	>1000 m3	3	0	Mechanical/ natural ventilation	2	1.1
3	0	output	methanol	6805902	0	0	n	0	min	0	5	0.0104167	0	4-5 days a week	1	0	closed containers	0	0	no cabin	1	0	None	1	1	0	regular inspections	0	No daily cleaning	0.01	0	no control measures	1	0	>1000 m3	3	0	Mechanical/ natural ventilation	2	1.1
4	upstream: acetylene	input	natural gas	5374629	0	0	n	0	min	0	5	0.0104167	0	4-5 days a week	1	0	closed containers	0	0	no cabin	1	0	None	1	1	0	regular inspections	0	No daily cleaning	0.01	0	no control measures	1	0	>1000 m3	3	0	Mechanical/ natural ventilation	2	1.1
4	0	process	natural gas	5374629	2000	0	y	min	min	5	5	0.0104167	0	4-5 days a week	1	0	closed containers	0	0	no cabin	1	0	None	1	1	0	regular inspections	0	No daily cleaning	0.01	0	no control measures	1	0	>1000 m3	3	0	Mechanical/ natural ventilation	2	1.1
4	0	output	acetylene	4366886	200	0	n	0	min	0	5	0.0104167	0	4-5 days a week	1	0	closed containers	0	0	no cabin	1	0	None	1	1	0	regular inspections	0	No daily cleaning	0.01	0	no control measures	1	0	>1000 m3	3	0	Mechanical/ natural ventilation	2	1.1
4	0	output	hydrogen	1007742	200	0	n	0	min	0	5	0.0104167	0	4-5 days a week	1	0	closed containers	0	0	no cabin	1	0	None	1	1	0	regular inspections	0	No daily cleaning	0.01	0	no control measures	1	0	>1000 m3	3	0	Mechanical/ natural ventilation	2	1.1
5	upstream: sodium hydroxide	input	sodium chloride	128363	0	0	n	0	min	0	5	0.0104167	0	4-5 days a week	1	0	closed containers	0	0	no cabin	1	0	None	1	1	0	regular inspections	0	No daily cleaning	0.01	0	no control measures	1	0	>1000 m3	3	0	Mechanical/ natural ventilation	2	1.1
5	0	process	sodium chloride	128363	620	0	y	0	min	0	30	0.0625	0	4-5 days a week	1	0	closed containers	0	0	no cabin	1	0	None	1	1	0	regular inspections	0	No daily cleaning	0.01	0	no control measures	1	0	>1000 m3	3	0	Mechanical/ natural ventilation	2	1.1
5	0	output	sodium	50472	0	0	n	0	min	0	5	0.0104167	0	4-5 days a week	1	0	closed containers	0	0	no cabin	1	0	None	1	1	0	regular inspections	0	No daily cleaning	0.01	0	no control measures	1	0	>1000 m3	3	0	Mechanical/ natural ventilation	2	1.1
5	0	output	chlorine (Cl2)	77861	0	0	n	0	min	0	5	0.0104167	0	4-5 days a week	1	0	closed containers	0	0	no cabin	1	0	None	1	1	0	regular inspections	0	No daily cleaning	0.01	0	no control measures	1	0	>1000 m3	3	0	Mechanical/ natural ventilation	2	1.1
6	upstream: sodium hydroxide 2	input	sodium	50472	0	0	n	0	min	0	5	0.0104167	0	4-5 days a week	1	0	closed containers	0	0	no cabin	1	0	None	1	1	0	regular inspections	0	No daily cleaning	0.01	0	no control measures	1	0	>1000 m3	3	0	Mechanical/ natural ventilation	2	1.1
6	0	input	water	39500	0	0	n	0	min	0	5	0.0104167	0	4-5 days a week	1	0	closed containers	0	0	no cabin	1	0	None	1	1	0	regular inspections	0	No daily cleaning	0.01	0	no control measures	1	0	>1000 m3	3	0	Mechanical/ natural ventilation	2	1.1
6	0	process	sodium	50472	0	0	y	0	min	0	30	0.0625	0	4-5 days a week	1	0	closed containers	0	0	no cabin	1	0	None	1	1	0	regular inspections	0	No daily cleaning	0.01	0	no control measures	1	0	>1000 m3	3	0	Mechanical/ natural ventilation	2	1.1
6	0	process	water	39500	0	0	y	0	min	0	30	0.0625	0	4-5 days a week	1	0	closed containers	0	0	no cabin	1	0	None	1	1	0	regular inspections	0	No daily cleaning	0.01	0	no control measures	1	0	>1000 m3	3	0	Mechanical/ natural ventilation	2	1.1
6	0	output	sodium hydroxide	87778	0	0	n	0	min	0	5	0.0104167	0	4-5 days a week	1	0	closed containers	0	0	no cabin	1	0	None	1	1	0	regular inspections	0	No daily cleaning	0.01	0	no control measures	1	0	>1000 m3	3	0	Mechanical/ natural ventilation	2	1.1
6	0	output	hydrogen	2194	0	0	n	0	min	0	5	0.0104167	0	4-5 days a week	1	0	closed containers	0	0	no cabin	1	0	None	1	1	0	regular inspections	0	No daily cleaning	0.01	0	no control measures	1	0	>1000 m3	3	0	Mechanical/ natural ventilation	2	1.1
7	upstream: phosphoric acid	input	sulfur	23409	0	0	n	0	min	0	5	0.0104167	0	4-5 days a week	1	0	closed containers	0	0	no cabin	1	0	None	1	1	0	regular inspections	0	No daily cleaning	0.01	0	no control measures	1	0	>1000 m3	3	0	Mechanical/ natural ventilation	2	1.1
7	0	input	air	23409	0	0	n	0	min	0	5	0.0104167	0	4-5 days a week	1	0	closed containers	0	0	no cabin	1	0	None	1	1	0	regular inspections	0	No daily cleaning	0.01	0	no control measures	1	0	>1000 m3	3	0	Mechanical/ natural ventilation	2	1.1
7	0	process	sulfur	23409	1800	0	y	0	min	0	30	0.0625	0	4-5 days a week	1	0	closed containers	0	0	no cabin	1	0	None	1	1	0	regular inspections	0	No daily cleaning	0.01	0	no control measures	1	0	>1000 m3	3	0	Mechanical/ natural ventilation	2	1.1
7	0	process	air	23409	1800	0	y	0	min	0	30	0.0625	0	4-5 days a week	1	0	closed containers	0	0	no cabin	1	0	None	1	1	0	regular inspections	0	No daily cleaning	0.01	0	no control measures	1	0	>1000 m3	3	0	Mechanical/ natural ventilation	2	1.1
7	0	output	sulfur dioxide	46818	0	0	n	0	min	0	5	0.0104167	0	4-5 days a week	1	0	closed containers	0	0	no cabin	1	0	None	1	1	0	regular inspections	0	No daily cleaning	0.01	0	no control measures	1	0	>1000 m3	3	0	Mechanical/ natural ventilation	2	1.1
8	upstream: phosphoric acid 2	input	sulfur dioxide	46818	0	0	n	0	min	0	5	0.0104167	0	4-5 days a week	1	0	closed containers	0	0	no cabin	1	0	None	1	1	0	regular inspections	0	No daily cleaning	0.01	0	no control measures	1	0	>1000 m3	3	0	Mechanical/ natural ventilation	2	1.1
8	0	input	oxygen	11704	0	0	n	0	min	0	5	0.0104167	0	4-5 days a week	1	0	closed containers	0	0	no cabin	1	0	None	1	1	0	regular inspections	0	No daily cleaning	0.01	0	no control measures	1	0	>1000 m3	3	0	Mechanical/ natural ventilation	2	1.1
8	0	process	sulfur dioxide	46818	500	y	y	0	min	0	30	0.0625	0	4-5 days a week	1	0	closed containers	0	0	no cabin	1	0	None	1	1	0	regular inspections	0	No daily cleaning	0.01	0	no control measures	1	0	>1000 m3	3	0	Mechanical/ natural ventilation	2	1.1
8	0	process	oxygen	11704	500	y	y	0	min	0	30	0.0625	0	4-5 days a week	1	0	closed containers	0	0	no cabin	1	0	None	1	1	0	regular inspections	0	No daily cleaning	0.01	0	no control measures	1	0	>1000 m3	3	0	Mechanical/ natural ventilation	2	1.1
8	0	output	sulfur trioxide	58523	0	0	n	0	min	0	5	0.0104167	0	4-5 days a week	1	0	closed containers	0	0	no cabin	1	0	None	1	1	0	regular inspections	0	No daily cleaning	0.01	0	no control measures	1	0	>1000 m3	3	0	Mechanical/ natural ventilation	2	1.1
9	upstream: phosphoric acid 3	input	sulfur trioxide	58523	0	0	n	0	min	0	5	0.0104167	0	4-5 days a week	1	0	closed containers	0	0	no cabin	1	0	None	1	1	0	regular inspections	0	No daily cleaning	0.01	0	no control measures	1	0	>1000 m3	3	0	Mechanical/ natural ventilation	2	1.1
9	0	input	water	13167	0	0	n	0	min	0	5	0.0104167	0	4-5 days a week	1	0	closed containers	0	0	no cabin	1	0	None	1	1	0	regular inspections	0	No daily cleaning	0.01	0	no control measures	1	0	>1000 m3	3	0	Mechanical/ natural ventilation	2	1.1
9	0	process	sulfur trioxide	58523	0	0	y	0	min	0	30	0.0625	0	4-5 days a week	1	0	closed containers	0	0	no cabin	1	0	None	1	1	0	regular inspections	0	No daily cleaning	0.01	0	no control measures	1	0	>1000 m3	3	0	Mechanical/ natural ventilation	2	1.1
9	0	process	water	13167	0	0	y	0	min	0	30	0.0625	0	4-5 days a week	1	0	closed containers	0	0	no cabin	1	0	None	1	1	0	regular inspections	0	No daily cleaning	0.01	0	no control measures	1	0	>1000 m3	3	0	Mechanical/ natural ventilation	2	1.1
9	0	output	sulfuric acid	71691	0	0	n	0	min	0	5	0.0104167	0	4-5 days a week	1	0	closed containers	0	0	no cabin	1	0	None	1	1	0	regular inspections	0	No daily cleaning	0.01	0	no control measures	1	0	>1000 m3	3	0	Mechanical/ natural ventilation	2	1.1
10	upstream: phosphoric acid 4	input	sulfuric acid	71691	0	0	n	0	min	0	5	0.0104167	0	4-5 days a week	1	0	closed containers	0	0	no cabin	1	0	None	1	1	0	regular inspections	0	No daily cleaning	0.01	0	no control measures	1	0	>1000 m3	3	0	Mechanical/ natural ventilation	2	1.1
10	0	input	apatite	363577	0	0	n	0	min	0	5	0.0104167	0	4-5 days a week	1	0	closed containers	0	0	no cabin	1	0	None	1	1	0	regular inspections	0	No daily cleaning	0.01	0	no control measures	1	0	>1000 m3	3	0	Mechanical/ natural ventilation	2	1.1
10	0	process	sulfuric acid	71691	0	0	y	0	min	0	30	0.0625	0	4-5 days a week	1	0	closed containers	0	0	no cabin	1	0	None	1	1	0	regular inspections	0	No daily cleaning	0.01	0	no control measures	1	0	>1000 m3	3	0	Mechanical/ natural ventilation	2	1.1
10	0	process	apatite	363577	0	0	y	0	min	0	30	0.0625	0	4-5 days a week	1	0	closed containers	0	0	no cabin	1	0	None	1	1	0	regular inspections	0	No daily cleaning	0.01	0	no control measures	1	0	>1000 m3	3	0	Mechanical/ natural ventilation	2	1.1
10	0	output	phosphoric acid	71691	0	0	n	0	min	0	5	0.0104167	0	4-5 days a week	1	0	closed containers	0	0	no cabin	1	0	None	1	1	0	regular inspections	0	No daily cleaning	0.01	0	no control measures	1	0	>1000 m3	3	0	Mechanical/ natural ventilation	2	1.1
10	0	output	byproducts	363577	0	0	n	0	min	0	5	0.0104167	0	4-5 days a week	1	0	closed containers	0	0	no cabin	1	0	None	1	1	0	regular inspections	0	No daily cleaning	0.01	0	no control measures	1	0	>1000 m3	3	0	Mechanical/ natural ventilation	2	1.1
11	upstream: potassium hydroxide	input	potassium chloride	1230975	0	0	n	0	min	0	5	0.0104167	0	4-5 days a week	1	0	closed containers	0	0	no cabin	1	0	None	1	1	0	regular inspections	0	No daily cleaning	0.01	0	no control measures	1	0	>1000 m3	3	0	Mechanical/ natural ventilation	2	1.1
11	0	process	potassium chloride	1230975	0	0	y	0	min	0	30	0.0625	0	4-5 days a week	1	0	closed containers	0	0	no cabin	1	0	None	1	1	0	regular inspections	0	No daily cleaning	0.01	0	no control measures	1	0	>1000 m3	3	0	Mechanical/ natural ventilation	2	1.1
11	0	output	potassium	644403	0	0	n	0	min	0	5	0.0104167	0	4-5 days a week	1	0	closed containers	0	0	no cabin	1	0	None	1	1	0	regular inspections	0	No daily cleaning	0.01	0	no control measures	1	0	>1000 m3	3	0	Mechanical/ natural ventilation	2	1.1
11	0	output	chlorine (Cl2)	586572	0	0	n	0	min	0	5	0.0104167	0	4-5 days a week	1	0	closed containers	0	0	no cabin	1	0	None	1	1	0	regular inspections	0	No daily cleaning	0.01	0	no control measures	1	0	>1000 m3	3	0	Mechanical/ natural ventilation	2	1.1
12	upstream: potassium hydroxide 2	input	potassium	644403	0	0	n	0	min	0	5	0.0104167	0	4-5 days a week	1	0	closed containers	0	0	no cabin	1	0	None	1	1	0	regular inspections	0	No daily cleaning	0.01	0	no control measures	1	0	>1000 m3	3	0	Mechanical/ natural ventilation	2	1.1
12	0	input	water	297416	0	0	n	0	min	0	5	0.0104167	0	4-5 days a week	1	0	closed containers	0	0	no cabin	1	0	None	1	1	0	regular inspections	0	No daily cleaning	0.01	0	no control measures	1	0	>1000 m3	3	0	Mechanical/ natural ventilation	2	1.1
12	0	process	potassium	644403	0	0	y	0	min	0	30	0.0625	0	4-5 days a week	1	0	closed containers	0	0	no cabin	1	0	None	1	1	0	regular inspections	0	No daily cleaning	0.01	0	no control measures	1	0	>1000 m3	3	0	Mechanical/ natural ventilation	2	1.1
12	0	process	water	297416	0	0	y	0	min	0	30	0.0625	0	4-5 days a week	1	0	closed containers	0	0	no cabin	1	0	None	1	1	0	regular inspections	0	No daily cleaning	0.01	0	no control measures	1	0	>1000 m3	3	0	Mechanical/ natural ventilation	2	1.1
12	0	output	potassium hydroxide	925296	0	0	n	0	min	0	5	0.0104167	0	4-5 days a week	1	0	closed containers	0	0	no cabin	1	0	None	1	1	0	regular inspections	0	No daily cleaning	0.01	0	no control measures	1	0	>1000 m3	3	0	Mechanical/ natural ventilation	2	1.1
12	0	output	hydrogen	16523	0	0	n	0	min	0	5	0.0104167	0	4-5 days a week	1	0	closed containers	0	0	no cabin	1	0	None	1	1	0	regular inspections	0	No daily cleaning	0.01	0	no control measures	1	0	>1000 m3	3	0	Mechanical/ natural ventilation	2	1.1
13	fixed-bed reactor	input	propylene	9858784	0	0	n	0	min	0	5	0.0104167	0	4-5 days a week	1	0	closed containers	0	0	no cabin	1	0	None	1	1	0	regular inspections	0	No daily cleaning	0.01	0	no control measures	1	0	>1000 m3	3	0	Mechanical/ natural ventilation	2	1.1
13	0	input	air	54279544	0	0	n	0	min	0	5	0.0104167	0	4-5 days a week	1	0	closed containers	0	0	no cabin	1	0	None	1	1	0	regular inspections	0	No daily cleaning	0.01	0	no control measures	1	0	>1000 m3	3	0	Mechanical/ natural ventilation	2	1.1
13	0	input	catalyst, metal oxyde	1	0	0	n	0	min	0	5	0.0104167	0	4-5 days a week	1	0	closed containers	0	0	no cabin	1	0	None	1	1	0	regular inspections	0	No daily cleaning	0.01	0	no control measures	1	0	>1000 m3	3	0	Mechanical/ natural ventilation	2	1.1
13	0	process	catalyst, metal oxyde	1	350	y	y	0	min	0	30	0.0625	0	4-5 days a week	1	0	closed containers	0	0	no cabin	1	0	None	1	1	0	regular inspections	0	No daily cleaning	0.01	0	no control measures	1	0	>1000 m3	3	0	Mechanical/ natural ventilation	2	1.1
13	0	process	acrolein	10507240	350	y	y	0	min	0	30	0.0625	0	4-5 days a week	1	0	closed containers	0	0	no cabin	1	0	None	1	1	0	regular inspections	0	No daily cleaning	0.01	0	no control measures	1	0	>1000 m3	3	0	Mechanical/ natural ventilation	2	1.1
13	0	process	sewage	67512057	350	y	y	0	min	0	30	0.0625	0	4-5 days a week	1	0	closed containers	0	0	no cabin	1	0	None	1	1	0	regular inspections	0	No daily cleaning	0.01	0	no control measures	1	0	>1000 m3	3	0	Mechanical/ natural ventilation	2	1.1
13	0	process	acetic acid	140689	350	y	y	0	min	0	30	0.0625	0	4-5 days a week	1	0	closed containers	0	0	no cabin	1	0	None	1	1	0	regular inspections	0	No daily cleaning	0.01	0	no control measures	1	0	>1000 m3	3	0	Mechanical/ natural ventilation	2	1.1
13	0	process	acrylic acid	1350616	350	y	y	0	min	0	30	0.0625	0	4-5 days a week	1	0	closed containers	0	0	no cabin	1	0	None	1	1	0	regular inspections	0	No daily cleaning	0.01	0	no control measures	1	0	>1000 m3	3	0	Mechanical/ natural ventilation	2	1.1
13	0	output	catalyst, metal oxyde	1	350	y	y	0	min	0	5	0.0104167	0	4-5 days a week	1	0	closed containers	0	0	no cabin	1	0	None	1	1	0	regular inspections	0	No daily cleaning	0.01	0	no control measures	1	0	>1000 m3	3	0	Mechanical/ natural ventilation	2	1.1
13	0	output	acrolein	10507240	350	y	y	0	min	0	5	0.0104167	0	4-5 days a week	1	0	closed containers	0	0	no cabin	1	0	None	1	1	0	regular inspections	0	No daily cleaning	0.01	0	no control measures	1	0	>1000 m3	3	0	Mechanical/ natural ventilation	2	1.1
13	0	output	sewage	67512057	350	y	y	0	min	0	5	0.0104167	0	4-5 days a week	1	0	closed containers	0	0	no cabin	1	0	None	1	1	0	regular inspections	0	No daily cleaning	0.01	0	no control measures	1	0	>1000 m3	3	0	Mechanical/ natural ventilation	2	1.1
13	0	output	acetic acid	140689	350	y	y	0	min	0	5	0.0104167	0	4-5 days a week	1	0	closed containers	0	0	no cabin	1	0	None	1	1	0	regular inspections	0	No daily cleaning	0.01	0	no control measures	1	0	>1000 m3	3	0	Mechanical/ natural ventilation	2	1.1
13	0	output	acrylic acid	1350616	350	y	y	0	min	0	5	0.0104167	0	4-5 days a week	1	0	closed containers	0	0	no cabin	1	0	None	1	1	0	regular inspections	0	No daily cleaning	0.01	0	no control measures	1	0	>1000 m3	3	0	Mechanical/ natural ventilation	2	1.1
14	quench	input	acrolein	10507240	350	y	y	0	min	0	5	0.0104167	0	4-5 days a week	1	0	closed containers	0	0	no cabin	1	0	None	1	1	0	regular inspections	0	No daily cleaning	0.01	0	no control measures	1	0	>1000 m3	3	0	Mechanical/ natural ventilation	2	1.1
14	0	input	sewage	67512057	350	y	y	0	min	0	5	0.0104167	0	4-5 days a week	1	0	closed containers	0	0	no cabin	1	0	None	1	1	0	regular inspections	0	No daily cleaning	0.01	0	no control measures	1	0	>1000 m3	3	0	Mechanical/ natural ventilation	2	1.1
14	0	input	acetic acid	140689	350	y	y	0	min	0	5	0.0104167	0	4-5 days a week	1	0	closed containers	0	0	no cabin	1	0	None	1	1	0	regular inspections	0	No daily cleaning	0.01	0	no control measures	1	0	>1000 m3	3	0	Mechanical/ natural ventilation	2	1.1
14	0	input	acrylic acid	1350616	350	y	y	0	min	0	5	0.0104167	0	4-5 days a week	1	0	closed containers	0	0	no cabin	1	0	None	1	1	0	regular inspections	0	No daily cleaning	0.01	0	no control measures	1	0	>1000 m3	3	0	Mechanical/ natural ventilation	2	1.1
14	0	process	acrolein	10507240	250	y	y	0	min	0	30	0.0625	0	4-5 days a week	1	0	closed containers	0	0	no cabin	1	0	None	1	1	0	regular inspections	0	No daily cleaning	0.01	0	no control measures	1	0	>1000 m3	3	0	Mechanical/ natural ventilation	2	1.1
14	0	process	sewage	67512057	250	y	y	0	min	0	30	0.0625	0	4-5 days a week	1	0	closed containers	0	0	no cabin	1	0	None	1	1	0	regular inspections	0	No daily cleaning	0.01	0	no control measures	1	0	>1000 m3	3	0	Mechanical/ natural ventilation	2	1.1
14	0	process	acetic acid	140689	250	y	y	0	min	0	30	0.0625	0	4-5 days a week	1	0	closed containers	0	0	no cabin	1	0	None	1	1	0	regular inspections	0	No daily cleaning	0.01	0	no control measures	1	0	>1000 m3	3	0	Mechanical/ natural ventilation	2	1.1
14	0	process	acrylic acid	1350616	250	y	y	0	min	0	30	0.0625	0	4-5 days a week	1	0	closed containers	0	0	no cabin	1	0	None	1	1	0	regular inspections	0	No daily cleaning	0.01	0	no control measures	1	0	>1000 m3	3	0	Mechanical/ natural ventilation	2	1.1
14	0	output	acrolein	10507240	70	y	y	0	min	0	5	0.0104167	0	4-5 days a week	1	0	closed containers	0	0	no cabin	1	0	None	1	1	0	regular inspections	0	No daily cleaning	0.01	0	no control measures	1	0	>1000 m3	3	0	Mechanical/ natural ventilation	2	1.1
14	0	output	sewage	67512057	70	y	y	0	min	0	5	0.0104167	0	4-5 days a week	1	0	closed containers	0	0	no cabin	1	0	None	1	1	0	regular inspections	0	No daily cleaning	0.01	0	no control measures	1	0	>1000 m3	3	0	Mechanical/ natural ventilation	2	1.1
14	0	output	acetic acid	140689	70	y	y	0	min	0	5	0.0104167	0	4-5 days a week	1	0	closed containers	0	0	no cabin	1	0	None	1	1	0	regular inspections	0	No daily cleaning	0.01	0	no control measures	1	0	>1000 m3	3	0	Mechanical/ natural ventilation	2	1.1
14	0	output	acrylic acid	10507240	70	y	y	0	min	0	5	0.0104167	0	4-5 days a week	1	0	closed containers	0	0	no cabin	1	0	None	1	1	0	regular inspections	0	No daily cleaning	0.01	0	no control measures	1	0	>1000 m3	3	0	Mechanical/ natural ventilation	2	1.1
15	gas purification	input	acrolein	10507240	70	y	y	0	min	0	5	0.0104167	0	4-5 days a week	1	0	closed containers	0	0	no cabin	1	0	None	1	1	0	regular inspections	0	No daily cleaning	0.01	0	no control measures	1	0	>1000 m3	3	0	Mechanical/ natural ventilation	2	1.1
15	0	input	sewage	67512057	70	y	y	0	min	0	5	0.0104167	0	4-5 days a week	1	0	closed containers	0	0	no cabin	1	0	None	1	1	0	regular inspections	0	No daily cleaning	0.01	0	no control measures	1	0	>1000 m3	3	0	Mechanical/ natural ventilation	2	1.1
15	0	input	acetic acid	140689	70	y	y	0	min	0	5	0.0104167	0	4-5 days a week	1	0	closed containers	0	0	no cabin	1	0	None	1	1	0	regular inspections	0	No daily cleaning	0.01	0	no control measures	1	0	>1000 m3	3	0	Mechanical/ natural ventilation	2	1.1
15	0	input	acrylic acid	1350616	70	y	y	0	min	0	5	0.0104167	0	4-5 days a week	1	0	closed containers	0	0	no cabin	1	0	None	1	1	0	regular inspections	0	No daily cleaning	0.01	0	no control measures	1	0	>1000 m3	3	0	Mechanical/ natural ventilation	2	1.1
15	0	process	acrolein	10507240	70	y	y	0	min	0	30	0.0625	0	4-5 days a week	1	0	closed containers	0	0	no cabin	1	0	None	1	1	0	regular inspections	0	No daily cleaning	0.01	0	no control measures	1	0	>1000 m3	3	0	Mechanical/ natural ventilation	2	1.1
15	0	process	sewage	67512057	70	y	y	0	min	0	30	0.0625	0	4-5 days a week	1	0	closed containers	0	0	no cabin	1	0	None	1	1	0	regular inspections	0	No daily cleaning	0.01	0	no control measures	1	0	>1000 m3	3	0	Mechanical/ natural ventilation	2	1.1
15	0	process	acetic acid	140689	70	y	y	0	min	0	30	0.0625	0	4-5 days a week	1	0	closed containers	0	0	no cabin	1	0	None	1	1	0	regular inspections	0	No daily cleaning	0.01	0	no control measures	1	0	>1000 m3	3	0	Mechanical/ natural ventilation	2	1.1
15	0	process	acrylic acid	1350616	70	y	y	0	min	0	30	0.0625	0	4-5 days a week	1	0	closed containers	0	0	no cabin	1	0	None	1	1	0	regular inspections	0	No daily cleaning	0.01	0	no control measures	1	0	>1000 m3	3	0	Mechanical/ natural ventilation	2	1.1
15	0	output	acrolein	#REF!	70	n	n	0	min	0	5	0.0104167	0	4-5 days a week	1	0	closed containers	0	0	no cabin	1	0	None	1	1	0	regular inspections	0	No daily cleaning	0.01	0	no control measures	1	0	>1000 m3	3	0	Mechanical/ natural ventilation	2	1.1
15	0	output	sewage	67512057	70	y	y	0	min	0	5	0.0104167	0	4-5 days a week	1	0	closed containers	0	0	no cabin	1	0	None	1	1	0	regular inspections	0	No daily cleaning	0.01	0	no control measures	1	0	>1000 m3	3	0	Mechanical/ natural ventilation	2	1.1
15	0	output	acetic acid	140689	70	y	y	0	min	0	5	0.0104167	0	4-5 days a week	1	0	closed containers	0	0	no cabin	1	0	None	1	1	0	regular inspections	0	No daily cleaning	0.01	0	no control measures	1	0	>1000 m3	3	0	Mechanical/ natural ventilation	2	1.1
15	0	output	acrylic acid	1350616	70	y	y	0	min	0	5	0.0104167	0	4-5 days a week	1	0	closed containers	0	0	no cabin	1	0	None	1	1	0	regular inspections	0	No daily cleaning	0.01	0	no control measures	1	0	>1000 m3	3	0	Mechanical/ natural ventilation	2	1.1
16	adsorption	input	acrolein	10507240	15	0	n	0	min	0	5	0.0104167	0	4-5 days a week	1	0	closed containers	0	0	no cabin	1	0	None	1	1	0	regular inspections	0	No daily cleaning	0.01	0	no control measures	1	0	>1000 m3	3	0	Mechanical/ natural ventilation	2	1.1
16	0	input	water	42723665	15	0	n	0	min	0	5	0.0104167	0	4-5 days a week	1	0	closed containers	0	0	no cabin	1	0	None	1	1	0	regular inspections	0	No daily cleaning	0.01	0	no control measures	1	0	>1000 m3	3	0	Mechanical/ natural ventilation	2	1.1
16	0	process	acrolein	10507240	15	y	y	0	min	0	30	0.0625	0	4-5 days a week	1	0	closed containers	0	0	no cabin	1	0	None	1	1	0	regular inspections	0	No daily cleaning	0.01	0	no control measures	1	0	>1000 m3	3	0	Mechanical/ natural ventilation	2	1.1
16	0	process	water	42723665	15	y	y	0	min	0	30	0.0625	0	4-5 days a week	1	0	closed containers	0	0	no cabin	1	0	None	1	1	0	regular inspections	0	No daily cleaning	0.01	0	no control measures	1	0	>1000 m3	3	0	Mechanical/ natural ventilation	2	1.1
16	0	output	carbon dioxide	1214802	15	y	y	0	min	0	5	0.0104167	0	4-5 days a week	1	0	closed containers	0	0	no cabin	1	0	None	1	1	0	regular inspections	0	No daily cleaning	0.01	0	no control measures	1	0	>1000 m3	3	0	Mechanical/ natural ventilation	2	1.1
16	0	output	carbon monoxide	1214802	15	y	y	0	min	0	5	0.0104167	0	4-5 days a week	1	0	closed containers	0	0	no cabin	1	0	None	1	1	0	regular inspections	0	No daily cleaning	0.01	0	no control measures	1	0	>1000 m3	3	0	Mechanical/ natural ventilation	2	1.1
16	0	output	nitrogen	41303282	15	y	y	0	min	0	5	0.0104167	0	4-5 days a week	1	0	closed containers	0	0	no cabin	1	0	None	1	1	0	regular inspections	0	No daily cleaning	0.01	0	no control measures	1	0	>1000 m3	3	0	Mechanical/ natural ventilation	2	1.1
16	0	output	oxygen	4859209	15	y	y	0	min	0	5	0.0104167	0	4-5 days a week	1	0	closed containers	0	0	no cabin	1	0	None	1	1	0	regular inspections	0	No daily cleaning	0.01	0	no control measures	1	0	>1000 m3	3	0	Mechanical/ natural ventilation	2	1.1
16	0	output	acrolein	10507240	15	0	n	0	min	0	5	0.0104167	0	4-5 days a week	1	0	closed containers	0	0	no cabin	1	0	None	1	1	0	regular inspections	0	No daily cleaning	0.01	0	no control measures	1	0	>1000 m3	3	0	Mechanical/ natural ventilation	2	1.1
17	combustion	input	carbon dioxide	1214802	0	0	n	0	min	0	5	0.0104167	0	4-5 days a week	1	0	closed containers	0	0	no cabin	1	0	None	1	1	0	regular inspections	0	No daily cleaning	0.01	0	no control measures	1	0	>1000 m3	3	0	Mechanical/ natural ventilation	2	1.1
17	0	input	carbon monoxide	1214802	0	0	n	0	min	0	5	0.0104167	0	4-5 days a week	1	0	closed containers	0	0	no cabin	1	0	None	1	1	0	regular inspections	0	No daily cleaning	0.01	0	no control measures	1	0	>1000 m3	3	0	Mechanical/ natural ventilation	2	1.1
17	0	input	nitrogen	41303282	0	0	n	0	min	0	5	0.0104167	0	4-5 days a week	1	0	closed containers	0	0	no cabin	1	0	None	1	1	0	regular inspections	0	No daily cleaning	0.01	0	no control measures	1	0	>1000 m3	3	0	Mechanical/ natural ventilation	2	1.1
17	0	input	oxygen	4859209	0	0	n	0	min	0	5	0.0104167	0	4-5 days a week	1	0	closed containers	0	0	no cabin	1	0	None	1	1	0	regular inspections	0	No daily cleaning	0.01	0	no control measures	1	0	>1000 m3	3	0	Mechanical/ natural ventilation	2	1.1
17	0	output	carbon dioxide	2429604	0	y	y	0	min	0	5	0.0104167	0	4-5 days a week	1	0	closed containers	0	0	no cabin	1	0	None	1	1	0	regular inspections	0	No daily cleaning	0.01	0	no control measures	1	0	>1000 m3	3	0	Mechanical/ natural ventilation	2	1.1
17	0	output	carbon monoxide	242	0	y	y	0	min	0	5	0.0104167	0	4-5 days a week	1	0	closed containers	0	0	no cabin	1	0	None	1	1	0	regular inspections	0	No daily cleaning	0.01	0	no control measures	1	0	>1000 m3	3	0	Mechanical/ natural ventilation	2	1.1
17	0	output	dinitrogen monoxide	24	0	y	y	0	min	0	5	0.0104167	0	4-5 days a week	1	0	closed containers	0	0	no cabin	1	0	None	1	1	0	regular inspections	0	No daily cleaning	0.01	0	no control measures	1	0	>1000 m3	3	0	Mechanical/ natural ventilation	2	1.1
17	0	output	oxygen	4859209	0	y	y	0	min	0	5	0.0104167	0	4-5 days a week	1	0	closed containers	0	0	no cabin	1	0	None	1	1	0	regular inspections	0	No daily cleaning	0.01	0	no control measures	1	0	>1000 m3	3	0	Mechanical/ natural ventilation	2	1.1
17	0	output	nitrogen	41303283	0	y	y	0	min	0	5	0.0104167	0	4-5 days a week	1	0	closed containers	0	0	no cabin	1	0	None	1	1	0	regular inspections	0	No daily cleaning	0.01	0	no control measures	1	0	>1000 m3	3	0	Mechanical/ natural ventilation	2	1.1
18	desorption	input	acrolein	10507240	0	y	y	0	min	0	5	0.0104167	0	4-5 days a week	1	0	closed containers	0	0	no cabin	1	0	None	1	1	0	regular inspections	0	No daily cleaning	0.01	0	no control measures	1	0	>1000 m3	3	0	Mechanical/ natural ventilation	2	1.1
18	0	input	water	42723665	0	y	y	0	min	0	5	0.0104167	0	4-5 days a week	1	0	closed containers	0	0	no cabin	1	0	None	1	1	0	regular inspections	0	No daily cleaning	0.01	0	no control measures	1	0	>1000 m3	3	0	Mechanical/ natural ventilation	2	1.1
18	0	process	acrolein	10507240	0	0	y	0	min	0	30	0.0625	0	4-5 days a week	1	0	closed containers	0	0	no cabin	1	0	None	1	1	0	regular inspections	0	No daily cleaning	0.01	0	no control measures	1	0	>1000 m3	3	0	Mechanical/ natural ventilation	2	1.1
18	0	process	water	42723665	0	0	y	0	min	0	30	0.0625	0	4-5 days a week	1	0	closed containers	0	0	no cabin	1	0	None	1	1	0	regular inspections	0	No daily cleaning	0.01	0	no control measures	1	0	>1000 m3	3	0	Mechanical/ natural ventilation	2	1.1
18	0	output	acrolein	10507240	0	n	n	0	min	0	5	0.0104167	0	4-5 days a week	1	0	closed containers	0	0	no cabin	1	0	None	1	1	0	regular inspections	0	No daily cleaning	0.01	0	no control measures	1	0	>1000 m3	3	0	Mechanical/ natural ventilation	2	1.1
18	0	output	water	42723665	0	n	n	0	min	0	5	0.0104167	0	4-5 days a week	1	0	closed containers	0	0	no cabin	1	0	None	1	1	0	regular inspections	0	No daily cleaning	0.01	0	no control measures	1	0	>1000 m3	3	0	Mechanical/ natural ventilation	2	1.1
19	compressor	input	acetylene	4596722	0	n	n	0	min	0	5	0.0104167	0	4-5 days a week	1	0	closed containers	0	0	no cabin	1	0	None	1	1	0	regular inspections	0	No daily cleaning	0.01	0	no control measures	1	0	>1000 m3	3	0	Mechanical/ natural ventilation	2	1.1
19	0	input	methanol	6805902	0	n	n	0	min	0	5	0.0104167	0	4-5 days a week	1	0	closed containers	0	0	no cabin	1	0	None	1	1	0	regular inspections	0	No daily cleaning	0.01	0	no control measures	1	0	>1000 m3	3	0	Mechanical/ natural ventilation	2	1.1
19	0	input	nitrogen	4044037	0	n	n	0	min	0	5	0.0104167	0	4-5 days a week	1	0	closed containers	0	0	no cabin	1	0	None	1	1	0	regular inspections	0	No daily cleaning	0.01	0	no control measures	1	0	>1000 m3	3	0	Mechanical/ natural ventilation	2	1.1
19	0	process	acetylene	4596722	0	y	y	0	min	0	30	0.0625	0	4-5 days a week	1	0	closed containers	0	0	no cabin	1	0	None	1	1	0	regular inspections	0	No daily cleaning	0.01	0	no control measures	1	0	>1000 m3	3	0	Mechanical/ natural ventilation	2	1.1
19	0	process	methanol	6805902	0	y	y	0	min	0	30	0.0625	0	4-5 days a week	1	0	closed containers	0	0	no cabin	1	0	None	1	1	0	regular inspections	0	No daily cleaning	0.01	0	no control measures	1	0	>1000 m3	3	0	Mechanical/ natural ventilation	2	1.1
19	0	process	nitrogen	4044037	0	y	y	0	min	0	30	0.0625	0	4-5 days a week	1	0	closed containers	0	0	no cabin	1	0	None	1	1	0	regular inspections	0	No daily cleaning	0.01	0	no control measures	1	0	>1000 m3	3	0	Mechanical/ natural ventilation	2	1.1
19	0	output	acetylene	4596722	0	y	y	0	min	0	5	0.0104167	0	4-5 days a week	1	0	closed containers	0	0	no cabin	1	0	None	1	1	0	regular inspections	0	No daily cleaning	0.01	0	no control measures	1	0	>1000 m3	3	0	Mechanical/ natural ventilation	2	1.1
19	0	output	methanol	6805902	0	y	y	0	min	0	5	0.0104167	0	4-5 days a week	1	0	closed containers	0	0	no cabin	1	0	None	1	1	0	regular inspections	0	No daily cleaning	0.01	0	no control measures	1	0	>1000 m3	3	0	Mechanical/ natural ventilation	2	1.1
19	0	output	nitrogen	4044037	0	y	y	0	min	0	5	0.0104167	0	4-5 days a week	1	0	closed containers	0	0	no cabin	1	0	None	1	1	0	regular inspections	0	No daily cleaning	0.01	0	no control measures	1	0	>1000 m3	3	0	Mechanical/ natural ventilation	2	1.1
20	pressure reactor	input	acetylene	4596722	150	y	y	0	min	0	5	0.0104167	0	4-5 days a week	1	0	closed containers	0	0	no cabin	1	0	None	1	1	0	regular inspections	0	No daily cleaning	0.01	0	no control measures	1	0	>1000 m3	3	0	Mechanical/ natural ventilation	2	1.1
20	0	input	methanol	6805902	150	y	y	0	min	0	5	0.0104167	0	4-5 days a week	1	0	closed containers	0	0	no cabin	1	0	None	1	1	0	regular inspections	0	No daily cleaning	0.01	0	no control measures	1	0	>1000 m3	3	0	Mechanical/ natural ventilation	2	1.1
20	0	input	nitrogen	4044037	150	y	y	0	min	0	5	0.0104167	0	4-5 days a week	1	0	closed containers	0	0	no cabin	1	0	None	1	1	0	regular inspections	0	No daily cleaning	0.01	0	no control measures	1	0	>1000 m3	3	0	Mechanical/ natural ventilation	2	1.1
20	0	process	acetylene	4596722	150	y	y	0	min	0	30	0.0625	0	4-5 days a week	1	0	closed containers	0	0	no cabin	1	0	None	1	1	0	regular inspections	0	No daily cleaning	0.01	0	no control measures	1	0	>1000 m3	3	0	Mechanical/ natural ventilation	2	1.1
20	0	process	methanol	6805902	150	y	y	0	min	0	30	0.0625	0	4-5 days a week	1	0	closed containers	0	0	no cabin	1	0	None	1	1	0	regular inspections	0	No daily cleaning	0.01	0	no control measures	1	0	>1000 m3	3	0	Mechanical/ natural ventilation	2	1.1
20	0	process	nitrogen	4044037	150	y	y	0	min	0	30	0.0625	0	4-5 days a week	1	0	closed containers	0	0	no cabin	1	0	None	1	1	0	regular inspections	0	No daily cleaning	0.01	0	no control measures	1	0	>1000 m3	3	0	Mechanical/ natural ventilation	2	1.1
20	0	process	catalyst	218344	150	y	y	0	min	0	30	0.0625	0	4-5 days a week	1	0	closed containers	0	0	no cabin	1	0	None	1	1	0	regular inspections	0	No daily cleaning	0.01	0	no control measures	1	0	>1000 m3	3	0	Mechanical/ natural ventilation	2	1.1
20	0	output	methylvinylether	9252969	150	0	n	0	min	0	5	0.0104167	0	4-5 days a week	1	0	closed containers	0	0	no cabin	1	0	None	1	1	0	regular inspections	0	No daily cleaning	0.01	0	no control measures	1	0	>1000 m3	3	0	Mechanical/ natural ventilation	2	1.1
20	0	output	catalyst	218344	0	0	n	0	min	0	5	0.0104167	0	4-5 days a week	1	0	closed containers	0	0	no cabin	1	0	None	1	1	0	regular inspections	0	No daily cleaning	0.01	0	no control measures	1	0	>1000 m3	3	0	Mechanical/ natural ventilation	2	1.1
20	0	output	emissions, air unspec.	3882275	0	0	n	0	min	0	5	0.0104167	0	4-5 days a week	1	0	closed containers	0	0	no cabin	1	0	None	1	1	0	regular inspections	0	No daily cleaning	0.01	0	no control measures	1	0	>1000 m3	3	0	Mechanical/ natural ventilation	2	1.1
20	0	output	acetylene	45967	0	0	n	0	min	0	5	0.0104167	0	4-5 days a week	1	0	closed containers	0	0	no cabin	1	0	None	1	1	0	regular inspections	0	No daily cleaning	0.01	0	no control measures	1	0	>1000 m3	3	0	Mechanical/ natural ventilation	2	1.1
20	0	output	nitrogen	4044037	0	0	n	0	min	0	5	0.0104167	0	4-5 days a week	1	0	closed containers	0	0	no cabin	1	0	None	1	1	0	regular inspections	0	No daily cleaning	0.01	0	no control measures	1	0	>1000 m3	3	0	Mechanical/ natural ventilation	2	1.1
20	0	output	methanol	1701475	0	0	n	0	min	0	5	0.0104167	0	4-5 days a week	1	0	closed containers	0	0	no cabin	1	0	None	1	1	0	regular inspections	0	No daily cleaning	0.01	0	no control measures	1	0	>1000 m3	3	0	Mechanical/ natural ventilation	2	1.1
21	condenser	input	methylvinylether	9252969	0	y	y	0	min	0	5	0.0104167	0	4-5 days a week	1	0	closed containers	0	0	no cabin	1	0	None	1	1	0	regular inspections	0	No daily cleaning	0.01	0	no control measures	1	0	>1000 m3	3	0	Mechanical/ natural ventilation	2	1.1
21	0	input	emissions, air unspec.	3882275	0	y	y	0	min	0	5	0.0104167	0	4-5 days a week	1	0	closed containers	0	0	no cabin	1	0	None	1	1	0	regular inspections	0	No daily cleaning	0.01	0	no control measures	1	0	>1000 m3	3	0	Mechanical/ natural ventilation	2	1.1
21	0	input	acetylene	45967	0	y	y	0	min	0	5	0.0104167	0	4-5 days a week	1	0	closed containers	0	0	no cabin	1	0	None	1	1	0	regular inspections	0	No daily cleaning	0.01	0	no control measures	1	0	>1000 m3	3	0	Mechanical/ natural ventilation	2	1.1
21	0	input	nitrogen	4044037	0	y	y	0	min	0	5	0.0104167	0	4-5 days a week	1	0	closed containers	0	0	no cabin	1	0	None	1	1	0	regular inspections	0	No daily cleaning	0.01	0	no control measures	1	0	>1000 m3	3	0	Mechanical/ natural ventilation	2	1.1
21	0	input	methanol	1701475	0	y	y	0	min	0	5	0.0104167	0	4-5 days a week	1	0	closed containers	0	0	no cabin	1	0	None	1	1	0	regular inspections	0	No daily cleaning	0.01	0	no control measures	1	0	>1000 m3	3	0	Mechanical/ natural ventilation	2	1.1
21	0	process	emissions, air unspec.	3882275	0	y	y	0	min	0	30	0.0625	0	4-5 days a week	1	0	closed containers	0	0	no cabin	1	0	None	1	1	0	regular inspections	0	No daily cleaning	0.01	0	no control measures	1	0	>1000 m3	3	0	Mechanical/ natural ventilation	2	1.1
21	0	process	acetylene	45967	0	y	y	0	min	0	30	0.0625	0	4-5 days a week	1	0	closed containers	0	0	no cabin	1	0	None	1	1	0	regular inspections	0	No daily cleaning	0.01	0	no control measures	1	0	>1000 m3	3	0	Mechanical/ natural ventilation	2	1.1
21	0	process	nitrogen	4044037	0	y	y	0	min	0	30	0.0625	0	4-5 days a week	1	0	closed containers	0	0	no cabin	1	0	None	1	1	0	regular inspections	0	No daily cleaning	0.01	0	no control measures	1	0	>1000 m3	3	0	Mechanical/ natural ventilation	2	1.1
21	0	process	methanol	1701475	0	y	y	0	min	0	30	0.0625	0	4-5 days a week	1	0	closed containers	0	0	no cabin	1	0	None	1	1	0	regular inspections	0	No daily cleaning	0.01	0	no control measures	1	0	>1000 m3	3	0	Mechanical/ natural ventilation	2	1.1
21	0	process	methylvinylether	9252969	0	y	y	0	min	0	30	0.0625	0	4-5 days a week	1	0	closed containers	0	0	no cabin	1	0	None	1	1	0	regular inspections	0	No daily cleaning	0.01	0	no control measures	1	0	>1000 m3	3	0	Mechanical/ natural ventilation	2	1.1
21	0	output	emissions, air unspec.	3882275	0	n	n	0	min	0	5	0.0104167	0	4-5 days a week	1	0	closed containers	0	0	no cabin	1	0	None	1	1	0	regular inspections	0	No daily cleaning	0.01	0	no control measures	1	0	>1000 m3	3	0	Mechanical/ natural ventilation	2	1.1
21	0	output	acetylene	45967	0	y	y	0	min	0	5	0.0104167	0	4-5 days a week	1	0	closed containers	0	0	no cabin	1	0	None	1	1	0	regular inspections	0	No daily cleaning	0.01	0	no control measures	1	0	>1000 m3	3	0	Mechanical/ natural ventilation	2	1.1
21	0	output	nitrogen	161761	0	0	n	0	min	0	5	0.0104167	0	4-5 days a week	1	0	closed containers	0	0	no cabin	1	0	None	1	1	0	regular inspections	0	No daily cleaning	0.01	0	no control measures	1	0	>1000 m3	3	0	Mechanical/ natural ventilation	2	1.1
21	0	output	methanol	1701475	0	y	y	0	min	0	5	0.0104167	0	4-5 days a week	1	0	closed containers	0	0	no cabin	1	0	None	1	1	0	regular inspections	0	No daily cleaning	0.01	0	no control measures	1	0	>1000 m3	3	0	Mechanical/ natural ventilation	2	1.1
21	0	output	methylvinylether	9252969	0	y	y	0	min	0	5	0.0104167	0	4-5 days a week	1	0	closed containers	0	0	no cabin	1	0	None	1	1	0	regular inspections	0	No daily cleaning	0.01	0	no control measures	1	0	>1000 m3	3	0	Mechanical/ natural ventilation	2	1.1
22	pressure de-aerator	input	methylvinylether	9252969	0	y	y	0	min	0	5	0.0104167	0	4-5 days a week	1	0	closed containers	0	0	no cabin	1	0	None	1	1	0	regular inspections	0	No daily cleaning	0.01	0	no control measures	1	0	>1000 m3	3	0	Mechanical/ natural ventilation	2	1.1
22	0	input	acetylene	45967	0	y	y	0	min	0	5	0.0104167	0	4-5 days a week	1	0	closed containers	0	0	no cabin	1	0	None	1	1	0	regular inspections	0	No daily cleaning	0.01	0	no control measures	1	0	>1000 m3	3	0	Mechanical/ natural ventilation	2	1.1
22	0	input	methanol	1701475	0	y	y	0	min	0	5	0.0104167	0	4-5 days a week	1	0	closed containers	0	0	no cabin	1	0	None	1	1	0	regular inspections	0	No daily cleaning	0.01	0	no control measures	1	0	>1000 m3	3	0	Mechanical/ natural ventilation	2	1.1
22	0	process	methylvinylether	9252969	0	y	y	0	min	0	30	0.0625	0	4-5 days a week	1	0	closed containers	0	0	no cabin	1	0	None	1	1	0	regular inspections	0	No daily cleaning	0.01	0	no control measures	1	0	>1000 m3	3	0	Mechanical/ natural ventilation	2	1.1
22	0	process	acetylene	45967	0	y	y	0	min	0	30	0.0625	0	4-5 days a week	1	0	closed containers	0	0	no cabin	1	0	None	1	1	0	regular inspections	0	No daily cleaning	0.01	0	no control measures	1	0	>1000 m3	3	0	Mechanical/ natural ventilation	2	1.1
22	0	process	methanol	1701475	0	y	y	0	min	0	30	0.0625	0	4-5 days a week	1	0	closed containers	0	0	no cabin	1	0	None	1	1	0	regular inspections	0	No daily cleaning	0.01	0	no control measures	1	0	>1000 m3	3	0	Mechanical/ natural ventilation	2	1.1
22	0	output	methylvinylether	9252969	0	y	y	0	min	0	5	0.0104167	0	4-5 days a week	1	0	closed containers	0	0	no cabin	1	0	None	1	1	0	regular inspections	0	No daily cleaning	0.01	0	no control measures	1	0	>1000 m3	3	0	Mechanical/ natural ventilation	2	1.1
22	0	output	acetylene	45967	0	n	n	0	min	0	5	0.0104167	0	4-5 days a week	1	0	closed containers	0	0	no cabin	1	0	None	1	1	0	regular inspections	0	No daily cleaning	0.01	0	no control measures	1	0	>1000 m3	3	0	Mechanical/ natural ventilation	2	1.1
22	0	output	methanol	1701475	0	y	y	0	min	0	5	0.0104167	0	4-5 days a week	1	0	closed containers	0	0	no cabin	1	0	None	1	1	0	regular inspections	0	No daily cleaning	0.01	0	no control measures	1	0	>1000 m3	3	0	Mechanical/ natural ventilation	2	1.1
23	column	input	methylvinylether	9252969	0	y	y	0	min	0	5	0.0104167	0	4-5 days a week	1	0	closed containers	0	0	no cabin	1	0	None	1	1	0	regular inspections	0	No daily cleaning	0.01	0	no control measures	1	0	>1000 m3	3	0	Mechanical/ natural ventilation	2	1.1
23	0	input	methanol	1701475	0	0	n	0	min	0	5	0.0104167	0	4-5 days a week	1	0	closed containers	0	0	no cabin	1	0	None	1	1	0	regular inspections	0	No daily cleaning	0.01	0	no control measures	1	0	>1000 m3	3	0	Mechanical/ natural ventilation	2	1.1
23	0	process	methanol	1701475	0	y	y	0	min	0	30	0.0625	0	4-5 days a week	1	0	closed containers	0	0	no cabin	1	0	None	1	1	0	regular inspections	0	No daily cleaning	0.01	0	no control measures	1	0	>1000 m3	3	0	Mechanical/ natural ventilation	2	1.1
23	0	process	methylvinylether	9252969	0	0	y	0	min	0	30	0.0625	0	4-5 days a week	1	0	closed containers	0	0	no cabin	1	0	None	1	1	0	regular inspections	0	No daily cleaning	0.01	0	no control measures	1	0	>1000 m3	3	0	Mechanical/ natural ventilation	2	1.1
23	0	output	methylvinylether	9252969	0	0	n	0	min	0	5	0.0104167	0	4-5 days a week	1	0	closed containers	0	0	no cabin	1	0	None	1	1	0	regular inspections	0	No daily cleaning	0.01	0	no control measures	1	0	>1000 m3	3	0	Mechanical/ natural ventilation	2	1.1
23	0	output	methanol	1701475	0	0	n	0	min	0	5	0.0104167	0	4-5 days a week	1	0	closed containers	0	0	no cabin	1	0	None	1	1	0	regular inspections	0	No daily cleaning	0.01	0	no control measures	1	0	>1000 m3	3	0	Mechanical/ natural ventilation	2	1.1
24	destillation	input	methanol	1701475	0	0	n	0	min	0	5	0.0104167	0	4-5 days a week	1	0	closed containers	0	0	no cabin	1	0	None	1	1	0	regular inspections	0	No daily cleaning	0.01	0	no control measures	1	0	>1000 m3	3	0	Mechanical/ natural ventilation	2	1.1
24	0	input	methylvinylether	9252969	0	0	n	0	min	0	5	0.0104167	0	4-5 days a week	1	0	closed containers	0	0	no cabin	1	0	None	1	1	0	regular inspections	0	No daily cleaning	0.01	0	no control measures	1	0	>1000 m3	3	0	Mechanical/ natural ventilation	2	1.1
24	0	process	methanol	1701475	0	0	y	0	min	0	30	0.0625	0	4-5 days a week	1	0	closed containers	0	0	no cabin	1	0	None	1	1	0	regular inspections	0	No daily cleaning	0.01	0	no control measures	1	0	>1000 m3	3	0	Mechanical/ natural ventilation	2	1.1
24	0	process	methylvinylether	9252969	0	0	y	0	min	0	30	0.0625	0	4-5 days a week	1	0	closed containers	0	0	no cabin	1	0	None	1	1	0	regular inspections	0	No daily cleaning	0.01	0	no control measures	1	0	>1000 m3	3	0	Mechanical/ natural ventilation	2	1.1
24	0	output	methanol	1701475	0	n	n	0	min	0	5	0.0104167	0	4-5 days a week	1	0	closed containers	0	0	no cabin	1	0	None	1	1	0	regular inspections	0	No daily cleaning	0.01	0	no control measures	1	0	>1000 m3	3	0	Mechanical/ natural ventilation	2	1.1
24	0	output	methylvinylether	9252969	0	n	n	0	min	0	5	0.0104167	0	4-5 days a week	1	0	closed containers	0	0	no cabin	1	0	None	1	1	0	regular inspections	0	No daily cleaning	0.01	0	no control measures	1	0	>1000 m3	3	0	Mechanical/ natural ventilation	2	1.1
25	washing column	input	methylvinylether	9252969	0	n	n	0	min	0	5	0.0104167	0	4-5 days a week	1	0	closed containers	0	0	no cabin	1	0	None	1	1	0	regular inspections	0	No daily cleaning	0.01	0	no control measures	1	0	>1000 m3	3	0	Mechanical/ natural ventilation	2	1.1
25	0	input	water	4626484	0	n	n	0	min	0	5	0.0104167	0	4-5 days a week	1	0	closed containers	0	0	no cabin	1	0	None	1	1	0	regular inspections	0	No daily cleaning	0.01	0	no control measures	1	0	>1000 m3	3	0	Mechanical/ natural ventilation	2	1.1
25	0	process	methylvinylether	9252969	0	0	y	0	min	0	30	0.0625	0	4-5 days a week	1	0	closed containers	0	0	no cabin	1	0	None	1	1	0	regular inspections	0	No daily cleaning	0.01	0	no control measures	1	0	>1000 m3	3	0	Mechanical/ natural ventilation	2	1.1
25	0	process	water	4626484	0	0	y	0	min	0	30	0.0625	0	4-5 days a week	1	0	closed containers	0	0	no cabin	1	0	None	1	1	0	regular inspections	0	No daily cleaning	0.01	0	no control measures	1	0	>1000 m3	3	0	Mechanical/ natural ventilation	2	1.1
25	0	output	methylvinylether	9252969	0	0	n	0	min	0	5	0.0104167	0	4-5 days a week	1	0	closed containers	0	0	no cabin	1	0	None	1	1	0	regular inspections	0	No daily cleaning	0.01	0	no control measures	1	0	>1000 m3	3	0	Mechanical/ natural ventilation	2	1.1
25	0	output	water	1850593	0	0	n	0	min	0	5	0.0104167	0	4-5 days a week	1	0	closed containers	0	0	no cabin	1	0	None	1	1	0	regular inspections	0	No daily cleaning	0.01	0	no control measures	1	0	>1000 m3	3	0	Mechanical/ natural ventilation	2	1.1
25	0	output	water	2775890	0	0	n	0	min	0	5	0.0104167	0	4-5 days a week	1	0	closed containers	0	0	no cabin	1	0	None	1	1	0	regular inspections	0	No daily cleaning	0.01	0	no control measures	1	0	>1000 m3	3	0	Mechanical/ natural ventilation	2	1.1
26	drying	input	water	1850593	0	y	y	0	min	0	5	0.0104167	0	4-5 days a week	1	0	closed containers	0	0	no cabin	1	0	None	1	1	0	regular inspections	0	No daily cleaning	0.01	0	no control measures	1	0	>1000 m3	3	0	Mechanical/ natural ventilation	2	1.1
26	0	input	methylvinylether	9252969	0	y	y	0	min	0	5	0.0104167	0	4-5 days a week	1	0	closed containers	0	0	no cabin	1	0	None	1	1	0	regular inspections	0	No daily cleaning	0.01	0	no control measures	1	0	>1000 m3	3	0	Mechanical/ natural ventilation	2	1.1
26	0	input	potassium hydroxide	925296	0	y	y	0	min	0	5	0.0104167	0	4-5 days a week	1	0	closed containers	0	0	no cabin	1	0	None	1	1	0	regular inspections	0	No daily cleaning	0.01	0	no control measures	1	0	>1000 m3	3	0	Mechanical/ natural ventilation	2	1.1
26	0	process	water	1850593	0	y	y	0	min	0	30	0.0625	0	4-5 days a week	1	0	closed containers	0	0	no cabin	1	0	None	1	1	0	regular inspections	0	No daily cleaning	0.01	0	no control measures	1	0	>1000 m3	3	0	Mechanical/ natural ventilation	2	1.1
26	0	process	methylvinylether	9252969	0	y	y	0	min	0	30	0.0625	0	4-5 days a week	1	0	closed containers	0	0	no cabin	1	0	None	1	1	0	regular inspections	0	No daily cleaning	0.01	0	no control measures	1	0	>1000 m3	3	0	Mechanical/ natural ventilation	2	1.1
26	0	process	potassium hydroxide	925296	0	y	y	0	min	0	30	0.0625	0	4-5 days a week	1	0	closed containers	0	0	no cabin	1	0	None	1	1	0	regular inspections	0	No daily cleaning	0.01	0	no control measures	1	0	>1000 m3	3	0	Mechanical/ natural ventilation	2	1.1
26	0	output	water	1850593	0	n	n	0	min	0	5	0.0104167	0	4-5 days a week	1	0	closed containers	0	0	no cabin	1	0	None	1	1	0	regular inspections	0	No daily cleaning	0.01	0	no control measures	1	0	>1000 m3	3	0	Mechanical/ natural ventilation	2	1.1
26	0	output	methylvinylether	9252969	0	n	n	0	min	0	5	0.0104167	0	4-5 days a week	1	0	closed containers	0	0	no cabin	1	0	None	1	1	0	regular inspections	0	No daily cleaning	0.01	0	no control measures	1	0	>1000 m3	3	0	Mechanical/ natural ventilation	2	1.1
26	0	output	potassium hydroxide	925296	0	n	n	0	min	0	5	0.0104167	0	4-5 days a week	1	0	closed containers	0	0	no cabin	1	0	None	1	1	0	regular inspections	0	No daily cleaning	0.01	0	no control measures	1	0	>1000 m3	3	0	Mechanical/ natural ventilation	2	1.1
27	tubular reactor	input	methylvinylether	9252969	170	n	n	0	min	0	5	0.0104167	0	4-5 days a week	1	0	closed containers	0	0	no cabin	1	0	None	1	1	0	regular inspections	0	No daily cleaning	0.01	0	no control measures	1	0	>1000 m3	3	0	Mechanical/ natural ventilation	2	1.1
27	0	input	acrolein	10507240	170	n	n	0	min	0	5	0.0104167	0	4-5 days a week	1	0	closed containers	0	0	no cabin	1	0	None	1	1	0	regular inspections	0	No daily cleaning	0.01	0	no control measures	1	0	>1000 m3	3	0	Mechanical/ natural ventilation	2	1.1
27	0	process	methylvinylether	9252969	170	y	y	0	min	0	30	0.0625	0	4-5 days a week	1	0	closed containers	0	0	no cabin	1	0	None	1	1	0	regular inspections	0	No daily cleaning	0.01	0	no control measures	1	0	>1000 m3	3	0	Mechanical/ natural ventilation	2	1.1
27	0	process	acrolein	10507240	170	y	y	0	min	0	30	0.0625	0	4-5 days a week	1	0	closed containers	0	0	no cabin	1	0	None	1	1	0	regular inspections	0	No daily cleaning	0.01	0	no control measures	1	0	>1000 m3	3	0	Mechanical/ natural ventilation	2	1.1
27	0	output	methylvinylether	6168646	170	y	y	0	min	0	5	0.0104167	0	4-5 days a week	1	0	closed containers	0	0	no cabin	1	0	None	1	1	0	regular inspections	0	No daily cleaning	0.01	0	no control measures	1	0	>1000 m3	3	0	Mechanical/ natural ventilation	2	1.1
27	0	output	acrolein	1167471	170	y	y	0	min	0	5	0.0104167	0	4-5 days a week	1	0	closed containers	0	0	no cabin	1	0	None	1	1	0	regular inspections	0	No daily cleaning	0.01	0	no control measures	1	0	>1000 m3	3	0	Mechanical/ natural ventilation	2	1.1
27	0	output	MDP	18184123	170	y	y	0	min	0	5	0.0104167	0	4-5 days a week	1	0	closed containers	0	0	no cabin	1	0	None	1	1	0	regular inspections	0	No daily cleaning	0.01	0	no control measures	1	0	>1000 m3	3	0	Mechanical/ natural ventilation	2	1.1
28	processing MDP	input	methylvinylether	6168646	170	y	y	0	min	0	5	0.0104167	0	4-5 days a week	1	0	closed containers	0	0	no cabin	1	0	None	1	1	0	regular inspections	0	No daily cleaning	0.01	0	no control measures	1	0	>1000 m3	3	0	Mechanical/ natural ventilation	2	1.1
28	0	input	acrolein	1167471	170	y	y	0	min	0	5	0.0104167	0	4-5 days a week	1	0	closed containers	0	0	no cabin	1	0	None	1	1	0	regular inspections	0	No daily cleaning	0.01	0	no control measures	1	0	>1000 m3	3	0	Mechanical/ natural ventilation	2	1.1
28	0	input	MDP	18184123	170	y	y	0	min	0	5	0.0104167	0	4-5 days a week	1	0	closed containers	0	0	no cabin	1	0	None	1	1	0	regular inspections	0	No daily cleaning	0.01	0	no control measures	1	0	>1000 m3	3	0	Mechanical/ natural ventilation	2	1.1
28	0	process	methylvinylether	6168646	170	y	y	0	min	0	30	0.0625	0	4-5 days a week	1	0	closed containers	0	0	no cabin	1	0	None	1	1	0	regular inspections	0	No daily cleaning	0.01	0	no control measures	1	0	>1000 m3	3	0	Mechanical/ natural ventilation	2	1.1
28	0	process	acrolein	1167471	170	y	y	0	min	0	30	0.0625	0	4-5 days a week	1	0	closed containers	0	0	no cabin	1	0	None	1	1	0	regular inspections	0	No daily cleaning	0.01	0	no control measures	1	0	>1000 m3	3	0	Mechanical/ natural ventilation	2	1.1
28	0	process	MDP	18184123	170	y	y	0	min	0	30	0.0625	0	4-5 days a week	1	0	closed containers	0	0	no cabin	1	0	None	1	1	0	regular inspections	0	No daily cleaning	0.01	0	no control measures	1	0	>1000 m3	3	0	Mechanical/ natural ventilation	2	1.1
28	0	output	methylvinylether	6168646	0	0	n	0	min	0	5	0.0104167	0	4-5 days a week	1	0	closed containers	0	0	no cabin	1	0	None	1	1	0	regular inspections	0	No daily cleaning	0.01	0	no control measures	1	0	>1000 m3	3	0	Mechanical/ natural ventilation	2	1.1
28	0	output	acrolein	1167471	0	y	y	0	min	0	5	0.0104167	0	4-5 days a week	1	0	closed containers	0	0	no cabin	1	0	None	1	1	0	regular inspections	0	No daily cleaning	0.01	0	no control measures	1	0	>1000 m3	3	0	Mechanical/ natural ventilation	2	1.1
28	0	output	MDP	18184123	0	y	y	0	min	0	5	0.0104167	0	4-5 days a week	1	0	closed containers	0	0	no cabin	1	0	None	1	1	0	regular inspections	0	No daily cleaning	0.01	0	no control measures	1	0	>1000 m3	3	0	Mechanical/ natural ventilation	2	1.1
29	reactor	input	MDP	18184123	0	0	n	0	min	0	5	0.0104167	0	4-5 days a week	1	0	closed containers	0	0	no cabin	1	0	None	1	1	0	regular inspections	0	No daily cleaning	0.01	0	no control measures	1	0	>1000 m3	3	0	Mechanical/ natural ventilation	2	1.1
29	0	input	phosphoric acid	71691	0	0	n	0	min	0	5	0.0104167	0	4-5 days a week	1	0	closed containers	0	0	no cabin	1	0	None	1	1	0	regular inspections	0	No daily cleaning	0.01	0	no control measures	1	0	>1000 m3	3	0	Mechanical/ natural ventilation	2	1.1
29	0	input	water	14338278	0	0	n	0	min	0	5	0.0104167	0	4-5 days a week	1	0	closed containers	0	0	no cabin	1	0	None	1	1	0	regular inspections	0	No daily cleaning	0.01	0	no control measures	1	0	>1000 m3	3	0	Mechanical/ natural ventilation	2	1.1
29	0	process	MDP	18184123	0	0	y	0	min	0	30	0.0625	0	4-5 days a week	1	0	closed containers	0	0	no cabin	1	0	None	1	1	0	regular inspections	0	No daily cleaning	0.01	0	no control measures	1	0	>1000 m3	3	0	Mechanical/ natural ventilation	2	1.1
29	0	process	phosphoric acid	71691	0	0	y	0	min	0	30	0.0625	0	4-5 days a week	1	0	closed containers	0	0	no cabin	1	0	None	1	1	0	regular inspections	0	No daily cleaning	0.01	0	no control measures	1	0	>1000 m3	3	0	Mechanical/ natural ventilation	2	1.1
29	0	process	water	14338278	0	0	y	0	min	0	30	0.0625	0	4-5 days a week	1	0	closed containers	0	0	no cabin	1	0	None	1	1	0	regular inspections	0	No daily cleaning	0.01	0	no control measures	1	0	>1000 m3	3	0	Mechanical/ natural ventilation	2	1.1
29	0	output	glutaraldehyde	15000000	0	0	n	0	min	0	5	0.0104167	0	4-5 days a week	1	0	closed containers	0	0	no cabin	1	0	None	1	1	0	regular inspections	0	No daily cleaning	0.01	0	no control measures	1	0	>1000 m3	3	0	Mechanical/ natural ventilation	2	1.1
29	0	output	MDP	181841	0	0	n	0	min	0	5	0.0104167	0	4-5 days a week	1	0	closed containers	0	0	no cabin	1	0	None	1	1	0	regular inspections	0	No daily cleaning	0.01	0	no control measures	1	0	>1000 m3	3	0	Mechanical/ natural ventilation	2	1.1
29	0	output	water	14338278	0	0	n	0	min	0	5	0.0104167	0	4-5 days a week	1	0	closed containers	0	0	no cabin	1	0	None	1	1	0	regular inspections	0	No daily cleaning	0.01	0	no control measures	1	0	>1000 m3	3	0	Mechanical/ natural ventilation	2	1.1
29	0	output	byproducts	898616	0	0	n	0	min	0	5	0.0104167	0	4-5 days a week	1	0	closed containers	0	0	no cabin	1	0	None	1	1	0	regular inspections	0	No daily cleaning	0.01	0	no control measures	1	0	>1000 m3	3	0	Mechanical/ natural ventilation	2	1.1
29	0	output	methanol	4800719	0	0	n	0	min	0	5	0.0104167	0	4-5 days a week	1	0	closed containers	0	0	no cabin	1	0	None	1	1	0	regular inspections	0	No daily cleaning	0.01	0	no control measures	1	0	>1000 m3	3	0	Mechanical/ natural ventilation	2	1.1
30	neutralization	input	glutaraldehyde	15000000	90	y	y	0	min	0	5	0.0104167	0	4-5 days a week	1	0	closed containers	0	0	no cabin	1	0	None	1	1	0	regular inspections	0	No daily cleaning	0.01	0	no control measures	1	0	>1000 m3	3	0	Mechanical/ natural ventilation	2	1.1
30	0	input	MDP	181841	90	y	y	0	min	0	5	0.0104167	0	4-5 days a week	1	0	closed containers	0	0	no cabin	1	0	None	1	1	0	regular inspections	0	No daily cleaning	0.01	0	no control measures	1	0	>1000 m3	3	0	Mechanical/ natural ventilation	2	1.1
30	0	input	water	14338278	30	y	y	0	min	0	5	0.0104167	0	4-5 days a week	1	0	closed containers	0	0	no cabin	1	0	None	1	1	0	regular inspections	0	No daily cleaning	0.01	0	no control measures	1	0	>1000 m3	3	0	Mechanical/ natural ventilation	2	1.1
30	0	input	byproducts	898616	90	y	y	0	min	0	5	0.0104167	0	4-5 days a week	1	0	closed containers	0	0	no cabin	1	0	None	1	1	0	regular inspections	0	No daily cleaning	0.01	0	no control measures	1	0	>1000 m3	3	0	Mechanical/ natural ventilation	2	1.1
30	0	input	methanol	4800719	90	y	y	0	min	0	5	0.0104167	0	4-5 days a week	1	0	closed containers	0	0	no cabin	1	0	None	1	1	0	regular inspections	0	No daily cleaning	0.01	0	no control measures	1	0	>1000 m3	3	0	Mechanical/ natural ventilation	2	1.1
30	0	input	sodium hydroxide	87778	90	y	y	0	min	0	5	0.0104167	0	4-5 days a week	1	0	closed containers	0	0	no cabin	1	0	None	1	1	0	regular inspections	0	No daily cleaning	0.01	0	no control measures	1	0	>1000 m3	3	0	Mechanical/ natural ventilation	2	1.1
30	0	process	glutaraldehyde	15000000	90	y	y	0	min	0	30	0.0625	0	4-5 days a week	1	0	closed containers	0	0	no cabin	1	0	None	1	1	0	regular inspections	0	No daily cleaning	0.01	0	no control measures	1	0	>1000 m3	3	0	Mechanical/ natural ventilation	2	1.1
30	0	process	MDP	181841	90	y	y	0	min	0	30	0.0625	0	4-5 days a week	1	0	closed containers	0	0	no cabin	1	0	None	1	1	0	regular inspections	0	No daily cleaning	0.01	0	no control measures	1	0	>1000 m3	3	0	Mechanical/ natural ventilation	2	1.1
30	0	process	water	14338278	90	y	y	0	min	0	30	0.0625	0	4-5 days a week	1	0	closed containers	0	0	no cabin	1	0	None	1	1	0	regular inspections	0	No daily cleaning	0.01	0	no control measures	1	0	>1000 m3	3	0	Mechanical/ natural ventilation	2	1.1
30	0	process	byproducts	898616	90	y	y	0	min	0	30	0.0625	0	4-5 days a week	1	0	closed containers	0	0	no cabin	1	0	None	1	1	0	regular inspections	0	No daily cleaning	0.01	0	no control measures	1	0	>1000 m3	3	0	Mechanical/ natural ventilation	2	1.1
30	0	process	methanol	4800719	90	y	y	0	min	0	30	0.0625	0	4-5 days a week	1	0	closed containers	0	0	no cabin	1	0	None	1	1	0	regular inspections	0	No daily cleaning	0.01	0	no control measures	1	0	>1000 m3	3	0	Mechanical/ natural ventilation	2	1.1
30	0	process	sodium hydroxide	87778	90	y	y	0	min	0	30	0.0625	0	4-5 days a week	1	0	closed containers	0	0	no cabin	1	0	None	1	1	0	regular inspections	0	No daily cleaning	0.01	0	no control measures	1	0	>1000 m3	3	0	Mechanical/ natural ventilation	2	1.1
30	0	output	glutaraldehyde	15000000	90	y	y	0	min	0	5	0.0104167	0	4-5 days a week	1	0	closed containers	0	0	no cabin	1	0	None	1	1	0	regular inspections	0	No daily cleaning	0.01	0	no control measures	1	0	>1000 m3	3	0	Mechanical/ natural ventilation	2	1.1
30	0	output	MDP	181841	90	y	y	0	min	0	5	0.0104167	0	4-5 days a week	1	0	closed containers	0	0	no cabin	1	0	None	1	1	0	regular inspections	0	No daily cleaning	0.01	0	no control measures	1	0	>1000 m3	3	0	Mechanical/ natural ventilation	2	1.1
30	0	output	water	14338278	90	y	y	0	min	0	5	0.0104167	0	4-5 days a week	1	0	closed containers	0	0	no cabin	1	0	None	1	1	0	regular inspections	0	No daily cleaning	0.01	0	no control measures	1	0	>1000 m3	3	0	Mechanical/ natural ventilation	2	1.1
30	0	output	byproducts	898616	90	y	y	0	min	0	5	0.0104167	0	4-5 days a week	1	0	closed containers	0	0	no cabin	1	0	None	1	1	0	regular inspections	0	No daily cleaning	0.01	0	no control measures	1	0	>1000 m3	3	0	Mechanical/ natural ventilation	2	1.1
30	0	output	methanol	4800719	90	y	y	0	min	0	5	0.0104167	0	4-5 days a week	1	0	closed containers	0	0	no cabin	1	0	None	1	1	0	regular inspections	0	No daily cleaning	0.01	0	no control measures	1	0	>1000 m3	3	0	Mechanical/ natural ventilation	2	1.1
30	0	output	sodium phosphate	119929	90	n	n	0	min	0	5	0.0104167	0	4-5 days a week	1	0	closed containers	0	0	no cabin	1	0	None	1	1	0	regular inspections	0	No daily cleaning	0.01	0	no control measures	1	0	>1000 m3	3	0	Mechanical/ natural ventilation	2	1.1
31	processing glutaraldehyde	input	glutaraldehyde	15000000	90	y	y	0	min	0	5	0.0104167	0	4-5 days a week	1	0	closed containers	0	0	no cabin	1	0	None	1	1	0	regular inspections	0	No daily cleaning	0.01	0	no control measures	1	0	>1000 m3	3	0	Mechanical/ natural ventilation	2	1.1
31	0	input	MDP	181841	90	y	y	0	min	0	5	0.0104167	0	4-5 days a week	1	0	closed containers	0	0	no cabin	1	0	None	1	1	0	regular inspections	0	No daily cleaning	0.01	0	no control measures	1	0	>1000 m3	3	0	Mechanical/ natural ventilation	2	1.1
31	0	input	water	11680765	90	y	y	0	min	0	5	0.0104167	0	4-5 days a week	1	0	closed containers	0	0	no cabin	1	0	None	1	1	0	regular inspections	0	No daily cleaning	0.01	0	no control measures	1	0	>1000 m3	3	0	Mechanical/ natural ventilation	2	1.1
31	0	input	byproducts	898616	90	y	y	0	min	0	5	0.0104167	0	4-5 days a week	1	0	closed containers	0	0	no cabin	1	0	None	1	1	0	regular inspections	0	No daily cleaning	0.01	0	no control measures	1	0	>1000 m3	3	0	Mechanical/ natural ventilation	2	1.1
31	0	input	methanol	4800719	90	y	y	0	min	0	5	0.0104167	0	4-5 days a week	1	0	closed containers	0	0	no cabin	1	0	None	1	1	0	regular inspections	0	No daily cleaning	0.01	0	no control measures	1	0	>1000 m3	3	0	Mechanical/ natural ventilation	2	1.1
31	0	process	glutaraldehyde	15000000	90	y	y	0	min	0	30	0.0625	0	4-5 days a week	1	0	closed containers	0	0	no cabin	1	0	None	1	1	0	regular inspections	0	No daily cleaning	0.01	0	no control measures	1	0	>1000 m3	3	0	Mechanical/ natural ventilation	2	1.1
31	0	process	MDP	181841	90	y	y	0	min	0	30	0.0625	0	4-5 days a week	1	0	closed containers	0	0	no cabin	1	0	None	1	1	0	regular inspections	0	No daily cleaning	0.01	0	no control measures	1	0	>1000 m3	3	0	Mechanical/ natural ventilation	2	1.1
31	0	process	water	11680765	90	y	y	0	min	0	30	0.0625	0	4-5 days a week	1	0	closed containers	0	0	no cabin	1	0	None	1	1	0	regular inspections	0	No daily cleaning	0.01	0	no control measures	1	0	>1000 m3	3	0	Mechanical/ natural ventilation	2	1.1
31	0	process	byproducts	898616	90	y	y	0	min	0	30	0.0625	0	4-5 days a week	1	0	closed containers	0	0	no cabin	1	0	None	1	1	0	regular inspections	0	No daily cleaning	0.01	0	no control measures	1	0	>1000 m3	3	0	Mechanical/ natural ventilation	2	1.1
31	0	process	methanol	4800719	90	y	y	0	min	0	30	0.0625	0	4-5 days a week	1	0	closed containers	0	0	no cabin	1	0	None	1	1	0	regular inspections	0	No daily cleaning	0.01	0	no control measures	1	0	>1000 m3	3	0	Mechanical/ natural ventilation	2	1.1
31	0	output	glutaraldehyde	15000000	0	n	n	0	min	0	5	0.0104167	0	4-5 days a week	1	0	closed containers	0	0	no cabin	1	0	None	1	1	0	regular inspections	0	No daily cleaning	0.01	0	no control measures	1	0	>1000 m3	3	0	Mechanical/ natural ventilation	2	1.1
31	0	output	MDP	181841	0	y	y	0	min	0	5	0.0104167	0	4-5 days a week	1	0	closed containers	0	0	no cabin	1	0	None	1	1	0	regular inspections	0	No daily cleaning	0.01	0	no control measures	1	0	>1000 m3	3	0	Mechanical/ natural ventilation	2	1.1
31	0	output	water	11680765	0	y	y	0	min	0	5	0.0104167	0	4-5 days a week	1	0	closed containers	0	0	no cabin	1	0	None	1	1	0	regular inspections	0	No daily cleaning	0.01	0	no control measures	1	0	>1000 m3	3	0	Mechanical/ natural ventilation	2	1.1
31	0	output	byproducts	898616	0	y	y	0	min	0	5	0.0104167	0	4-5 days a week	1	0	closed containers	0	0	no cabin	1	0	None	1	1	0	regular inspections	0	No daily cleaning	0.01	0	no control measures	1	0	>1000 m3	3	0	Mechanical/ natural ventilation	2	1.1
31	0	output	methanol	4800719	0	y	y	0	min	0	5	0.0104167	0	4-5 days a week	1	0	closed containers	0	0	no cabin	1	0	None	1	1	0	regular inspections	0	No daily cleaning	0.01	0	no control measures	1	0	>1000 m3	3	0	Mechanical/ natural ventilation	2	1.1
0	0	0	0	0	0	0	n	0	min	0	0	0	0	4-5 days a week	1	0	closed containers	0	0	no cabin	1	0	None	1	1	0	regular inspections	0	No daily cleaning	0.01	0	no control measures	1	0	>1000 m3	3	0	Mechanical/ natural ventilation	2	1.1
0	0	0	0	0	0	0	n	0	min	0	0	0	0	4-5 days a week	1	0	closed containers	0	0	no cabin	1	0	None	1	1	0	regular inspections	0	No daily cleaning	0.01	0	no control measures	1	0	>1000 m3	3	0	Mechanical/ natural ventilation	2	1.1
0	0	0	0	0	0	0	n	0	min	0	0	0	0	4-5 days a week	1	0	closed containers	0	0	no cabin	1	0	None	1	1	0	regular inspections	0	No daily cleaning	0.01	0	no control measures	1	0	>1000 m3	3	0	Mechanical/ natural ventilation	2	1.1
0	0	0	0	0	0	0	n	0	min	0	0	0	0	4-5 days a week	1	0	closed containers	0	0	no cabin	1	0	None	1	1	0	regular inspections	0	No daily cleaning	0.01	0	no control measures	1	0	>1000 m3	3	0	Mechanical/ natural ventilation	2	1.1
0	0	0	0	0	0	0	n	0	min	0	0	0	0	4-5 days a week	1	0	closed containers	0	0	no cabin	1	0	None	1	1	0	regular inspections	0	No daily cleaning	0.01	0	no control measures	1	0	>1000 m3	3	0	Mechanical/ natural ventilation	2	1.1
0	0	0	0	0	0	0	n	0	min	0	0	0	0	4-5 days a week	1	0	closed containers	0	0	no cabin	1	0	None	1	1	0	regular inspections	0	No daily cleaning	0.01	0	no control measures	1	0	>1000 m3	3	0	Mechanical/ natural ventilation	2	1.1
0	0	0	0	0	0	0	n	0	min	0	0	0	0	4-5 days a week	1	0	closed containers	0	0	no cabin	1	0	None	1	1	0	regular inspections	0	No daily cleaning	0.01	0	no control measures	1	0	>1000 m3	3	0	Mechanical/ natural ventilation	2	1.1
0	0	0	0	0	0	0	n	0	min	0	0	0	0	4-5 days a week	1	0	closed containers	0	0	no cabin	1	0	None	1	1	0	regular inspections	0	No daily cleaning	0.01	0	no control measures	1	0	>1000 m3	3	0	Mechanical/ natural ventilation	2	1.1
0	0	0	0	0	0	0	n	0	min	0	0	0	0	4-5 days a week	1	0	closed containers	0	0	no cabin	1	0	None	1	1	0	regular inspections	0	No daily cleaning	0.01	0	no control measures	1	0	>1000 m3	3	0	Mechanical/ natural ventilation	2	1.1
0	0	0	0	0	0	0	n	0	min	0	0	0	0	4-5 days a week	1	0	closed containers	0	0	no cabin	1	0	None	1	1	0	regular inspections	0	No daily cleaning	0.01	0	no control measures	1	0	>1000 m3	3	0	Mechanical/ natural ventilation	2	1.1
0	0	0	0	0	0	0	n	0	min	0	0	0	0	4-5 days a week	1	0	closed containers	0	0	no cabin	1	0	None	1	1	0	regular inspections	0	No daily cleaning	0.01	0	no control measures	1	0	>1000 m3	3	0	Mechanical/ natural ventilation	2	1.1
0	0	0	0	0	0	0	n	0	min	0	0	0	0	4-5 days a week	1	0	closed containers	0	0	no cabin	1	0	None	1	1	0	regular inspections	0	No daily cleaning	0.01	0	no control measures	1	0	>1000 m3	3	0	Mechanical/ natural ventilation	2	1.1
0	0	0	0	0	0	0	n	0	min	0	0	0	0	4-5 days a week	1	0	closed containers	0	0	no cabin	1	0	None	1	1	0	regular inspections	0	No daily cleaning	0.01	0	no control measures	1	0	>1000 m3	3	0	Mechanical/ natural ventilation	2	1.1
0	0	0	0	0	0	0	n	0	min	0	0	0	0	4-5 days a week	1	0	closed containers	0	0	no cabin	1	0	None	1	1	0	regular inspections	0	No daily cleaning	0.01	0	no control measures	1	0	>1000 m3	3	0	Mechanical/ natural ventilation	2	1.1
0	0	0	0	0	0	0	n	0	min	0	0	0	0	4-5 days a week	1	0	closed containers	0	0	no cabin	1	0	None	1	1	0	regular inspections	0	No daily cleaning	0.01	0	no control measures	1	0	>1000 m3	3	0	Mechanical/ natural ventilation	2	1.1
0	0	0	0	0	0	0	n	0	min	0	0	0	0	4-5 days a week	1	0	closed containers	0	0	no cabin	1	0	None	1	1	0	regular inspections	0	No daily cleaning	0.01	0	no control measures	1	0	>1000 m3	3	0	Mechanical/ natural ventilation	2	1.1
0	0	0	0	0	0	0	n	0	min	0	0	0	0	4-5 days a week	1	0	closed containers	0	0	no cabin	1	0	None	1	1	0	regular inspections	0	No daily cleaning	0.01	0	no control measures	1	0	>1000 m3	3	0	Mechanical/ natural ventilation	2	1.1
0	0	0	0	0	0	0	n	0	min	0	0	0	0	4-5 days a week	1	0	closed containers	0	0	no cabin	1	0	None	1	1	0	regular inspections	0	No daily cleaning	0.01	0	no control measures	1	0	>1000 m3	3	0	Mechanical/ natural ventilation	2	1.1
0	0	0	0	0	0	0	n	0	min	0	0	0	0	4-5 days a week	1	0	closed containers	0	0	no cabin	1	0	None	1	1	0	regular inspections	0	No daily cleaning	0.01	0	no control measures	1	0	>1000 m3	3	0	Mechanical/ natural ventilation	2	1.1
0	0	0	0	0	0	0	n	0	min	0	0	0	0	4-5 days a week	1	0	closed containers	0	0	no cabin	1	0	None	1	1	0	regular inspections	0	No daily cleaning	0.01	0	no control measures	1	0	>1000 m3	3	0	Mechanical/ natural ventilation	2	1.1
0	0	0	0	0	0	0	n	0	min	0	0	0	0	4-5 days a week	1	0	closed containers	0	0	no cabin	1	0	None	1	1	0	regular inspections	0	No daily cleaning	0.01	0	no control measures	1	0	>1000 m3	3	0	Mechanical/ natural ventilation	2	1.1
0	0	0	0	0	0	0	n	0	min	0	0	0	0	4-5 days a week	1	0	closed containers	0	0	no cabin	1	0	None	1	1	0	regular inspections	0	No daily cleaning	0.01	0	no control measures	1	0	>1000 m3	3	0	Mechanical/ natural ventilation	2	1.1
0	0	0	0	0	0	0	n	0	min	0	0	0	0	4-5 days a week	1	0	closed containers	0	0	no cabin	1	0	None	1	1	0	regular inspections	0	No daily cleaning	0.01	0	no control measures	1	0	>1000 m3	3	0	Mechanical/ natural ventilation	2	1.1
0	0	0	0	0	0	0	n	0	min	0	0	0	0	4-5 days a week	1	0	closed containers	0	0	no cabin	1	0	None	1	1	0	regular inspections	0	No daily cleaning	0.01	0	no control measures	1	0	>1000 m3	3	0	Mechanical/ natural ventilation	2	1.1
0	0	0	0	0	0	0	n	0	min	0	0	0	0	4-5 days a week	1	0	closed containers	0	0	no cabin	1	0	None	1	1	0	regular inspections	0	No daily cleaning	0.01	0	no control measures	1	0	>1000 m3	3	0	Mechanical/ natural ventilation	2	1.1
0	0	0	0	0	0	0	n	0	min	0	0	0	0	4-5 days a week	1	0	closed containers	0	0	no cabin	1	0	None	1	1	0	regular inspections	0	No daily cleaning	0.01	0	no control measures	1	0	>1000 m3	3	0	Mechanical/ natural ventilation	2	1.1
0	0	0	0	0	0	0	n	0	min	0	0	0	0	4-5 days a week	1	0	closed containers	0	0	no cabin	1	0	None	1	1	0	regular inspections	0	No daily cleaning	0.01	0	no control measures	1	0	>1000 m3	3	0	Mechanical/ natural ventilation	2	1.1
0	0	0	0	0	0	0	n	0	min	0	0	0	0	4-5 days a week	1	0	closed containers	0	0	no cabin	1	0	None	1	1	0	regular inspections	0	No daily cleaning	0.01	0	no control measures	1	0	>1000 m3	3	0	Mechanical/ natural ventilation	2	1.1
0	0	0	0	0	0	0	n	0	min	0	0	0	0	4-5 days a week	1	0	closed containers	0	0	no cabin	1	0	None	1	1	0	regular inspections	0	No daily cleaning	0.01	0	no control measures	1	0	>1000 m3	3	0	Mechanical/ natural ventilation	2	1.1
0	0	0	0	0	0	0	n	0	min	0	0	0	0	4-5 days a week	1	0	closed containers	0	0	no cabin	1	0	None	1	1	0	regular inspections	0	No daily cleaning	0.01	0	no control measures	1	0	>1000 m3	3	0	Mechanical/ natural ventilation	2	1.1
0	0	0	0	0	0	0	n	0	min	0	0	0	0	4-5 days a week	1	0	closed containers	0	0	no cabin	1	0	None	1	1	0	regular inspections	0	No daily cleaning	0.01	0	no control measures	1	0	>1000 m3	3	0	Mechanical/ natural ventilation	2	1.1
0	0	0	0	0	0	0	n	0	min	0	0	0	0	4-5 days a week	1	0	closed containers	0	0	no cabin	1	0	None	1	1	0	regular inspections	0	No daily cleaning	0.01	0	no control measures	1	0	>1000 m3	3	0	Mechanical/ natural ventilation	2	1.1
0	0	0	0	0	0	0	n	0	min	0	0	0	0	4-5 days a week	1	0	closed containers	0	0	no cabin	1	0	None	1	1	0	regular inspections	0	No daily cleaning	0.01	0	no control measures	1	0	>1000 m3	3	0	Mechanical/ natural ventilation	2	1.1
0	0	0	0	0	0	0	n	0	min	0	0	0	0	4-5 days a week	1	0	closed containers	0	0	no cabin	1	0	None	1	1	0	regular inspections	0	No daily cleaning	0.01	0	no control measures	1	0	>1000 m3	3	0	Mechanical/ natural ventilation	2	1.1
0	0	0	0	0	0	0	n	0	min	0	0	0	0	4-5 days a week	1	0	closed containers	0	0	no cabin	1	0	None	1	1	0	regular inspections	0	No daily cleaning	0.01	0	no control measures	1	0	>1000 m3	3	0	Mechanical/ natural ventilation	2	1.1
0	0	0	0	0	0	0	n	0	min	0	0	0	0	4-5 days a week	1	0	closed containers	0	0	no cabin	1	0	None	1	1	0	regular inspections	0	No daily cleaning	0.01	0	no control measures	1	0	>1000 m3	3	0	Mechanical/ natural ventilation	2	1.1
0	0	0	0	0	0	0	n	0	min	0	0	0	0	4-5 days a week	1	0	closed containers	0	0	no cabin	1	0	None	1	1	0	regular inspections	0	No daily cleaning	0.01	0	no control measures	1	0	>1000 m3	3	0	Mechanical/ natural ventilation	2	1.1
0	0	0	0	0	0	0	n	0	min	0	0	0	0	4-5 days a week	1	0	closed containers	0	0	no cabin	1	0	None	1	1	0	regular inspections	0	No daily cleaning	0.01	0	no control measures	1	0	>1000 m3	3	0	Mechanical/ natural ventilation	2	1.1
0	0	0	0	0	0	0	n	0	min	0	0	0	0	4-5 days a week	1	0	closed containers	0	0	no cabin	1	0	None	1	1	0	regular inspections	0	No daily cleaning	0.01	0	no control measures	1	0	>1000 m3	3	0	Mechanical/ natural ventilation	2	1.1
0	0	0	0	0	0	0	n	0	min	0	0	0	0	4-5 days a week	1	0	closed containers	0	0	no cabin	1	0	None	1	1	0	regular inspections	0	No daily cleaning	0.01	0	no control measures	1	0	>1000 m3	3	0	Mechanical/ natural ventilation	2	1.1
0	0	0	0	0	0	0	n	0	min	0	0	0	0	4-5 days a week	1	0	closed containers	0	0	no cabin	1	0	None	1	1	0	regular inspections	0	No daily cleaning	0.01	0	no control measures	1	0	>1000 m3	3	0	Mechanical/ natural ventilation	2	1.1

[truncated: 14 more sheets: Skin-MT Hand, Skin-MT body, Skin-HRS local, Skin-HRS systemic, M08,G03, M08 tab 10,11, S08 App. A,C, M08, tab 4,5,6,7,8,9, O03, tab 2,3,5,7,8, O03, G03, tab 1, G03, tab A1, W03, tab 8, PROC]
