# Supplementary material for: Synthesis design using mass related metrics, environmental metrics, and health metrics
Source: publisher site journal article supplement (doi:10.1515/pac-2021-0326), 2022-02-01
Supplement: Supplementary file 6 [file pac-2021-0326_suppl_006_STOFFENMANAGER_MODIFICATION_example_oleuropein_aglycon.xlsx]

## Sheet: START
SUPPORTING INFORMATION related to Eissen M., "Synthesis design using mass related metrics, environmental metrics, and health metrics"
		Instructions
	Literature
	No.	quoted as
	1	F09	W. Fransman, J. W. Cherrie, M. van Tongeren, T. Schneider, M. Tischer, J. Schinkel, H. Marquart, N. Warren, H. Kromhout, E. Tielemans, TNO report - V8667 - Development of a mechanistic model for the Advanced REACH Tool (ART) - Beta release (September 2009) -, 2009, p. 270.
	2	H09	H. a. S. Executive, The technical basis for COSHH essentials: Easy steps to control chemicals, 2009, http://www.coshh-essentials.org.uk/assets/live/CETB.pdf.
	3	M08	H. Marquart, H. Heussen, M. Le Feber, D. Noy, E. Tielemans, J. Schinkel, J. West, D. Van der Schaaf, 'Stoffenmanager', a web-based control banding tool using an exposure process model, Ann. Occup. Hyg. 2008, 52, 6, 429-441, <Go to ISI>://000258329800003.
	4	O03	R. Oppl, F. Kalberlah, P. G. Evans, J. J. Van Hemmen, A toolkit for dermal risk assessment and management: An overview, Ann. Occup. Hyg. 2003, 47, 8, 629-640, <Go to ISI>://000186748400006.
	5	G03	H. A. Goede, S. Tijssen, H. J. Schipper, N. Warren, R. Oppl, F. Kalberlah, J. J. Van Hemmen, Classification of dermal exposure modifiers and assignment of values for a risk assessment toolkit, Annals of Occupational Hygiene 2003, 47, 8, 609-618, <Go to ISI>://000186748400004.
	6	W03	N. Warren, H. A. Goede, S. Tijssen, R. Oppl, H. J. Schipper, J. J. Van Hemmen, Deriving default dermal exposure values for use in a risk assessment toolkit for small and medium-sized enterprises, Annals of Occupational Hygiene 2003, 47, 8, 619-627, <Go to ISI>://000186748400005.
	7	SW03	U. Schuhmacher-Wolz, F. Kalberlah, R. Oppl, J. J. Van Hemmen, A toolkit for dermal risk assessment: Toxicological approach for hazard characterization, Ann. Occup. Hyg. 2003, 47, 8, 641-652, <Go to ISI>://000186748400007.
	8	S08	J. Schinkel, W. Fransman, H. Heussen, H. Kromhout, H. Marquart, E. Tielemans, Cross-validation and refinement of the Stoffenmanager as a first tier exposure assessment tool for REACH, Occup. Environ. Med. 2010, 67, 125-132, http://oem.bmj.com/cgi/content/abstract/oem.2008.045500v1.
	9	T08	E. Tielemans, D. Noy, J. Schinkel, H. Heussen, D. Van der Schaaf, J. West, W. Fransman, Stoffenmanager exposure model: Development of a quantitative algorithm, Annals of Occupational Hygiene 2008, 52, 6, 443-454, <Go to ISI>://000258329800004.

## Sheet: INPUT-Settings
	Basis for hazard bands		b	2				hazard band
	Factor between exposure bands		c	2		exposure band		A/1	B/2	C/3	D/4	E/5
							1	0.0078125	0.015625	0.03125	0.0625	0.125
							2	0.015625	0.03125	0.0625	0.125	0.25
							3	0.03125	0.0625	0.125	0.25	0.5
	Default-values						4	0.0625	0.125	0.25	0.5	1
	Room size	>1000 m3
	Ventilation	Mechanical/ natural ventilation
	local controls	no control measures
	cleaning	No daily cleaning
	inspection	regular inspections
	protection	None
	imission reduction	no cabin
	handling	closed containers
	Duration input (min)	5
	Duration process (min)	30
	Duration output (min)	5
	Exposure frequency	4-5 days a week
	unit time (min/h)	min
	Mix?	n
	Consideration of substances w/o R-phrase (0=ignore; 1= Hazard Group A)	1
	Consideration of gases	1
	room temperature (°C)	20
	Default values
	Task group	Immersion
IF solid	wet/dry	Like dry solids
IF liquid	Temperature above which liquids are "heated"/ freely in °C	50
	Restricted workspace?	Restricted workspace
	work level?	at or below waistlevel
	amount	Normal
	automation	fully automated
	clothing	thick clothing
	Exposed Body Area	<10 (size of a large coin, small splashes)

## Sheet: INPUT-Substances
	aggregate state	(Do NOT enter data here: determined from boiling and melting point)	((only necessary, if substance is liquid sometime in the process))		((only necessary, if substance is solid sometime in the process))
Substance	at room temperature	(at 20°C)	Boiling Point (°C)	Volatility	texture	Melting Point (°C)	R-phrases -->										corrosive (pH<2/>11,5)	mol weight	log Kow
propylene	gas	gas	-47.7			-185.3	12											42.08
oxygen	gas						8											32
catalyst, metal oxyde	solid	solid			Granules or flakes	1500												70
acrolein	liquid		52	like water			11	24	25	26	34	40
acrylic acid	liquid		141	like water			10	20	21	22	35	50
phosphoric acid	liquid		213	like oil/grease			34											98
acetaldehyde	gas	liquid	20.4			-123	12	36	37	40								44.1
MDP	liquid		127.1	like oil/grease			10	20	36									114.15
methane	gas						12											16.04
methylvinylether	gas						12											58.08
nitrogen	gas																	14.0067
propane	gas	gas	-42			-188	12											44.01
water	liquid		100	like water														18.02
sewage	liquid		100	like water														18.02
inert gas	gas
byproducts	liquid		100	like water
methanol	liquid	liquid	65	like solvent		-98	11	23	24	25	39							32.04
acetylene	gas						12											26.04
acetic acid	liquid		118	like water			10	35
carbon monoxide	gas						12	23	48	61								28.01
carbon dioxide	gas																	44.01
dinitrogen monoxide	gas						8											44.01
catalyst	solid
emissions, air unspec.	gas
potassium hydroxide	solid	solid			Coarse Dust	360	22	35										56.11
glutaraldehyde	liquid	liquid	188	like oil/grease		-6	23	25	34	42	43	50
sodium hydroxide	solid	solid			Firm granules or flakes	322	35											40
sodium phosphate	solid	solid			Granules or flakes	75	36	37	38
sodium	solid	solid			Fine dust	97.72	14	15	34									22.98
natural gas	gas						12											16.04
air	gas
hydrogen	gas						12											2
sodium chloride	solid	solid			Firm granules or flakes	801												58.443
chlorine (Cl2)	gas						23	36	37	38	50							70.9
apatite	solid	solid			Solid objects	1000												497.413
sulfuric acid	liquid		337	like solvent			35											98.08
sulfur dioxide	gas						23	24										64.06
sulfur trioxide	solid	solid			Extremely dusty products	62.2	14	34										80.06
sulfur	solid	solid	444.72	like oil/grease	Firm granules or flakes	115.21	38											32.065
potassium chloride	solid	solid			Coarse Dust	770												74.55
potassium	solid	solid			Coarse Dust	63.38	14	15	34									39.0983
olive leaves	solid				Solid objects
olive leaves, dried	solid				Granules or flakes
olive leaves, dried, ground	solid				Fine dust
extract P0	liquid		100	like water
extract P0, concentrated	liquid		100	like water
enzyme	solid				Fine dust		42
adsorber	solid				Firm granules or flakes
ethanol	liquid	liquid	78			-114	11
op-agly	liquid		100	like water
naphta	liquid		150	like oil/grease			12	20	21	38	45	46	48	63	65	67
ethylene	gas						12	67
ethane	gas						12
1,3-butadiene	gas						12	45	46
butene	gas						12

## Sheet: INPUT-Production
							exposure duration		frequency
Step	Name	In/Out	Substance	mass (kg)	temperature (°C)	Mix?	min/h	value		Handling	imission reduction	protection	inspection	cleaning	local controls	Room size	Ventilation
1	upstream: ethanol	input	naphta	201
1		process	hydrogen	4	830	y	min	0.007
1		process	methane	30.9	830	y	min	0.007
1		process	acetylene	0.8	830	y	min	0.007
1		process	propylene	32.4	830	y	min	0.007
1		process	propane	2.4	830	y	min	0.007
1		process	1,3-butadiene	8.6	830	y	min	0.007
1		process	butene	11.1	830	y	min	0.007
1		process	ethylene	57.7	830	y	min	0.007
1		output	hydrogen	4	170	y
1		output	methane	30.9	170	y
1		output	acetylene	0.8	170	y
1		output	propylene	32.4	170	y
1		output	propane	2.4	170	y
1		output	1,3-butadiene	8.6	170	y
1		output	butene	11.1	170	y
1		output	ethylene	57.7	170	n
2	drying	input	olive leaves	400
2		process	olive leaves	200	50		h	4
2		output	olive leaves, dried	200		n
2		output	water	200		n
3	milling	input	olive leaves, dried	200
3		process	olive leaves, dried, ground	200
3		output	olive leaves, dried, ground	200
4	extraction	input	olive leaves, dried, ground	200
4		input	water	1800
4		process	olive leaves, dried, ground	200	90	y	h	1
4		process	water	1800	90	y	h	1
4		output	olive leaves, dried, ground	200		y
4		output	water	1800		y
5	filtration	input	olive leaves, dried, ground	200		y
5		input	water	1800		y
5		process	olive leaves, dried, ground	200
5		process	water	1800
5		output	extract P0	1550
5		output	olive leaves, dried, ground	200		y
5		output	water	250		y
6	concentrating	input	extract P0	1550
6		process	extract P0, concentrated	100	50	y
6		process	water	1450	50	y
6		output	extract P0, concentrated	100		n
6		output	water	1450		n
7	biotransformation	input	extract P0, concentrated	100		n
7		input	enzyme	0.2		n
7		process	extract P0, concentrated	100	37	y	h	24
7		process	enzyme	0.2	37	y	h	24
7		output	extract P0, concentrated	100		y
7		output	enzyme	0.2		y
8	denaturating	input	extract P0, concentrated	100		y
8		input	enzyme	0.2		y
8		process	extract P0, concentrated	100		y
8		process	enzyme	0.2		y
8		output	extract P0, concentrated	100
9	adsorption	input	extract P0, concentrated	100		n
9		input	adsorber	30		n
9		process	extract P0, concentrated	100		y	h	2
9		process	adsorber	30		y	h	2
9		output	extract P0, concentrated	100		y
9		output	adsorber	30		n
10	elution	input	extract P0, concentrated	100		n
10		input	adsorber	30		n
10		input	ethanol	94.8		n
10		process	adsorber	30		y
10		process	ethanol	94.8		y
10		output	adsorber	30
10		output	ethanol	94.8
11	vaporization	input	ethanol	94.8
11		process	ethanol	94.8	50
11		output	ethanol	94.8	50
11		output	op-agly	2.7

## Sheet: INPUT-Skin
					IF solid
Step	Name	in/out	Substance	Task group	dry/wet	restriction	work level	amount	automation	clothing	EBA
1	upstream: ethanol	input	naphta
1	upstream: ethanol	process	hydrogen
1	upstream: ethanol	process	methane
1	upstream: ethanol	process	acetylene
1	upstream: ethanol	process	propylene
1	upstream: ethanol	process	propane
1	upstream: ethanol	process	1,3-butadiene
1	upstream: ethanol	process	butene
1	upstream: ethanol	process	ethylene
1	upstream: ethanol	output	hydrogen
1	upstream: ethanol	output	methane
1	upstream: ethanol	output	acetylene
1	upstream: ethanol	output	propylene
1	upstream: ethanol	output	propane
1	upstream: ethanol	output	1,3-butadiene
1	upstream: ethanol	output	butene
1	upstream: ethanol	output	ethylene
2	drying	input	olive leaves
2	drying	process	olive leaves
2	drying	output	olive leaves, dried
2	drying	output	water
3	milling	input	olive leaves, dried
3	milling	process	olive leaves, dried, ground
3	milling	output	olive leaves, dried, ground
4	extraction	input	olive leaves, dried, ground
4	extraction	input	water
4	extraction	process	olive leaves, dried, ground
4	extraction	process	water
4	extraction	output	olive leaves, dried, ground
4	extraction	output	water
5	filtration	input	olive leaves, dried, ground
5	filtration	input	water
5	filtration	process	olive leaves, dried, ground
5	filtration	process	water
5	filtration	output	extract P0
5	filtration	output	olive leaves, dried, ground
5	filtration	output	water
6	concentrating	input	extract P0
6	concentrating	process	extract P0, concentrated
6	concentrating	process	water
6	concentrating	output	extract P0, concentrated
6	concentrating	output	water
7	biotransformation	input	extract P0, concentrated
7	biotransformation	input	enzyme
7	biotransformation	process	extract P0, concentrated
7	biotransformation	process	enzyme
7	biotransformation	output	extract P0, concentrated
7	biotransformation	output	enzyme
8	denaturating	input	extract P0, concentrated
8	denaturating	input	enzyme
8	denaturating	process	extract P0, concentrated
8	denaturating	process	enzyme
8	denaturating	output	extract P0, concentrated
9	adsorption	input	extract P0, concentrated
9	adsorption	input	adsorber
9	adsorption	process	extract P0, concentrated
9	adsorption	process	adsorber
9	adsorption	output	extract P0, concentrated
9	adsorption	output	adsorber
10	elution	input	extract P0, concentrated
10	elution	input	adsorber
10	elution	input	ethanol
10	elution	process	adsorber
10	elution	process	ethanol
10	elution	output	adsorber
10	elution	output	ethanol
11	vaporization	input	ethanol
11	vaporization	process	ethanol
11	vaporization	output	ethanol
11	vaporization	output	op-agly
0
0
0
0
0
0
0
0
0
0
0
0
0
0
0
0
0
0
0
0
0
0
0
0
0
0
0
0
0
0
0
0
0
0
0
0
0
0
0
0
0
0
0
0
0
0
0
0
0
0
0
0
0
0
0
0
0
0
0
0
0
0
0
0
0
0
0
0
0
0
0
0
0
0
0
0
0
0
0
0
0
0
0
0
0
0
0
0
0
0
0
0
0
0
0
0
0
0
0
0
0
0
0
0
0
0
0
0
0
0
0
0
0
0
0
0
0
0
0
0
0
0
0
0
0
0
0
0
0
0
0
0
0
0
0
0
0
0
0
0
0
0
0
0
0
0
0
0
0
0
0
0
0
0
0
0
0
0
0
0
0
0
0
0
0
0
0
0
0
0
0
0
0
0
0
0
0
0
0
0
0
0
0
0
0
0
0
0
0
0
0
0
0
0
0
0
0
0
0
0
0
0
0
0
0
0
0
0
0
0
0
0
0
0
0
0
0
0
0
0
0
0
0
0
0
0
0
0

## Sheet: RESULT-
HI	inhalation+skin systemic+skinlocal				inhalation				skin systemic				skin local
step	input	process	output	step	input	process	output	step	input	process	output	step	input	process	output
step	input	process	output
1	1.4891	0.0884797	0.256283	1	0.148901	0.0884797	0.256283	1	0.340198	0	0	1	1	0	0
2	0	0	0	2	0	0	0	2	0	0	0	2	0	0	0
3	0	0	0	3	0	0	0	3	0	0	0	3	0	0	0
4	0	0	0	4	0	0	0	4	0	0	0	4	0	0	0
5	0	0	0	5	0	0	0	5	0	0	0	5	0	0	0
6	0	0	0	6	0	0	0	6	0	0	0	6	0	0	0
7	0.209849	0.193071	0.0823268	7	0.209849	0.193071	0.0823268	7	0	0	0	7	0	0	0
8	0.0823268	0.107811	0	8	0.0823268	0.107811	0	8	0	0	0	8	0	0	0
9	0	0	0	9	0	0	0	9	0	0	0	9	0	0	0
10	0.0137708	0.0173026	0.0137708	10	0.0137708	0.0173026	0.0137708	10	0	0	0	10	0	0	0
11	0.0137708	0.0215345	0.0164442	11	0.0137708	0.0215345	0.0164442	11	0	0	0	11	0	0	0
12	0	0	0	12	0	0	0	12	0	0	0	12	0	0	0
13	0	0	0	13	0	0	0	13	0	0	0	13	0	0	0
14	0	0	0	14	0	0	0	14	0	0	0	14	0	0	0
15	0	0	0	15	0	0	0	15	0	0	0	15	0	0	0
16	0	0	0	16	0	0	0	16	0	0	0	16	0	0	0
17	0	0	0	17	0	0	0	17	0	0	0	17	0	0	0
18	0	0	0	18	0	0	0	18	0	0	0	18	0	0	0
19	0	0	0	19	0	0	0	19	0	0	0	19	0	0	0
20	0	0	0	20	0	0	0	20	0	0	0	20	0	0	0
21	0	0	0	21	0	0	0	21	0	0	0	21	0	0	0
22	0	0	0	22	0	0	0	22	0	0	0	22	0	0	0
23	0	0	0	23	0	0	0	23	0	0	0	23	0	0	0
24	0	0	0	24	0	0	0	24	0	0	0	24	0	0	0
25	0	0	0	25	0	0	0	25	0	0	0	25	0	0	0
26	0	0	0	26	0	0	0	26	0	0	0	26	0	0	0
27	0	0	0	27	0	0	0	27	0	0	0	27	0	0	0
28	0	0	0	28	0	0	0	28	0	0	0	28	0	0	0
29	0	0	0	29	0	0	0	29	0	0	0	29	0	0	0
30	0	0	0	30	0	0	0	30	0	0	0	30	0	0	0
31	0	0	0	31	0	0	0	31	0	0	0	31	0	0	0
32	0	0	0	32	0	0	0	32	0	0	0	32	0	0	0
33	0	0	0	33	0	0	0	33	0	0	0	33	0	0	0
34	0	0	0	34	0	0	0	34	0	0	0	34	0	0	0
35	0	0	0	35	0	0	0	35	0	0	0	35	0	0	0
		inhalatin	skin sys.	skin loc.
	1	0.493663	0.340198	1
	2	0	0	0
	3	0	0	0
	4	0	0	0
	5	0	0	0
	6	0	0	0
	7	0.485247	0	0
	8	0.190138	0	0
	9	0	0	0
	10	0.0448442	0	0
	11	0.0517495	0	0
	12	0	0	0
	13	0	0	0
	14	0	0	0
	15	0	0	0
	16	0	0	0
	17	0	0	0
	18	0	0	0
	19	0	0	0
	20	0	0	0
	21	0	0	0
	22	0	0	0
	23	0	0	0
	24	0	0	0
	25	0	0	0
	26	0	0	0
	27	0	0	0
	28	0	0	0
	29	0	0	0
	30	0	0	0
	31	0	0	0
	32	0	0	0
	33	0	0	0
	34	0	0	0
	35	0	0	0

## Sheet: WH
Allokation of R-phrases			Determination Weighting Factor for Hazard (WH)
R-phrase	Hazard Group	Hazard-Nr	Substance	Hazard-Nrs										toxic?	harmfull?	48/68	combination	Hazard combination	MAX-Hazard	WH
1		1	propylene	1	0	0	0	0	0	0	0	0	0	no	no	no	no		1	0.0625
2		1	oxygen	1	0	0	0	0	0	0	0	0	0	no	no	no	no		1	0.0625
3		1	catalyst, metal oxyde	0	0	0	0	0	0	0	0	0	0	no	no	no	no		0	0
4		1	acrolein	1	3	3	4	3	4	0	0	0	0	toxic	no	no	no		4	0.5
5		1	acrylic acid	1	2	2	2	3	1	0	0	0	0	no	harmful	no	no		3	0.25
6		1	phosphoric acid	3	0	0	0	0	0	0	0	0	0	no	no	no	no		3	0.25
7		1	acetaldehyde	1	1	3	4	0	0	0	0	0	0	no	no	no	no		4	0.5
8		1	MDP	1	2	1	0	0	0	0	0	0	0	no	harmful	no	no		2	0.125
9		1	methane	1	0	0	0	0	0	0	0	0	0	no	no	no	no		1	0.0625
10		1	methylvinylether	1	0	0	0	0	0	0	0	0	0	no	no	no	no		1	0.0625
11		1	nitrogen	0	0	0	0	0	0	0	0	0	0	no	no	no	no		0	0
12		1	propane	1	0	0	0	0	0	0	0	0	0	no	no	no	no		1	0.0625
13		1	water	0	0	0	0	0	0	0	0	0	0	no	no	no	no		0	0
14		1	sewage	0	0	0	0	0	0	0	0	0	0	no	no	no	no		0	0
15		1	inert gas	0	0	0	0	0	0	0	0	0	0	no	no	no	no		0	0
16		1	byproducts	0	0	0	0	0	0	0	0	0	0	no	no	no	no		0	0
17		1	methanol	1	3	3	3	4	0	0	0	0	0	toxic	no	no	no		4	0.5
18		1	acetylene	1	0	0	0	0	0	0	0	0	0	no	no	no	no		1	0.0625
19		1	acetic acid	1	3	0	0	0	0	0	0	0	0	no	no	no	no		3	0.25
20	B	2	carbon monoxide	1	3	1	4	0	0	0	0	0	0	toxic	no	48	48toxic	4	4	0.5
21	B	2	carbon dioxide	0	0	0	0	0	0	0	0	0	0	no	no	no	no		0	0
22	B	2	dinitrogen monoxide	1	0	0	0	0	0	0	0	0	0	no	no	no	no		1	0.0625
23	C	3	catalyst	0	0	0	0	0	0	0	0	0	0	no	no	no	no		0	0
24	C	3	emissions, air unspec.	0	0	0	0	0	0	0	0	0	0	no	no	no	no		0	0
25	C	3	potassium hydroxide	2	3	0	0	0	0	0	0	0	0	no	harmful	no	no		3	0.25
26	D	4	glutaraldehyde	3	3	3	5	3	1	0	0	0	0	toxic	no	no	no		5	1
27	D	4	sodium hydroxide	3	0	0	0	0	0	0	0	0	0	no	no	no	no		3	0.25
28	D	4	sodium phosphate	1	3	1	0	0	0	0	0	0	0	no	no	no	no		3	0.25
29		1	sodium	1	1	3	0	0	0	0	0	0	0	no	no	no	no		3	0.25
30		1	natural gas	1	0	0	0	0	0	0	0	0	0	no	no	no	no		1	0.0625
31		1	air	0	0	0	0	0	0	0	0	0	0	no	no	no	no		0	0
32		1	hydrogen	1	0	0	0	0	0	0	0	0	0	no	no	no	no		1	0.0625
33		1	sodium chloride	0	0	0	0	0	0	0	0	0	0	no	no	no	no		0	0
34	C	3	chlorine (Cl2)	3	1	3	1	1	0	0	0	0	0	toxic	no	no	no		3	0.25
35	C	3	apatite	0	0	0	0	0	0	0	0	0	0	no	no	no	no		0	0
36		1	sulfuric acid	3	0	0	0	0	0	0	0	0	0	no	no	no	no		3	0.25
37	C	3	sulfur dioxide	3	3	0	0	0	0	0	0	0	0	toxic	no	no	no		3	0.25
38		1	sulfur trioxide	1	3	0	0	0	0	0	0	0	0	no	no	no	no		3	0.25
39	D	4	sulfur	1	0	0	0	0	0	0	0	0	0	no	no	no	no		1	0.0625
40	D	4	potassium chloride	0	0	0	0	0	0	0	0	0	0	no	no	no	no		0	0
41	C	3	potassium	1	1	3	0	0	0	0	0	0	0	no	no	no	no		3	0.25
42	E	5	olive leaves	0	0	0	0	0	0	0	0	0	0	no	no	no	no		0	0
43	C	3	olive leaves, dried	0	0	0	0	0	0	0	0	0	0	no	no	no	no		0	0
44		1	olive leaves, dried, ground	0	0	0	0	0	0	0	0	0	0	no	no	no	no		0	0
45	E	5	extract P0	0	0	0	0	0	0	0	0	0	0	no	no	no	no		0	0
46	E	5	extract P0, concentrated	0	0	0	0	0	0	0	0	0	0	no	no	no	no		0	0
47		1	enzyme	5	0	0	0	0	0	0	0	0	0	no	no	no	no		5	1
48		1	adsorber	0	0	0	0	0	0	0	0	0	0	no	no	no	no		0	0
49	E	5	ethanol	1	0	0	0	0	0	0	0	0	0	no	no	no	no		1	0.0625
50		1	op-agly	0	0	0	0	0	0	0	0	0	0	no	no	no	no		0	0
51		1	naphta	1	2	2	1	5	5	1	4	1	1	no	harmful	48	48harmful	3	5	1
52		1	ethylene	1	1	0	0	0	0	0	0	0	0	no	no	no	no		1	0.0625
53		1	ethane	1	0	0	0	0	0	0	0	0	0	no	no	no	no		1	0.0625
54		1	1,3-butadiene	1	5	5	0	0	0	0	0	0	0	no	no	no	no		5	1
55		1	butene	1	0	0	0	0	0	0	0	0	0	no	no	no	no		1	0.0625
56		1	0	0	0	0	0	0	0	0	0	0	0	no	no	no	no		0	0
57		1	0	0	0	0	0	0	0	0	0	0	0	no	no	no	no		0	0
58		1	0	0	0	0	0	0	0	0	0	0	0	no	no	no	no		0	0
59		1	0	0	0	0	0	0	0	0	0	0	0	no	no	no	no		0	0
60	D	4	0	0	0	0	0	0	0	0	0	0	0	no	no	no	no		0	0
61	D	4	0	0	0	0	0	0	0	0	0	0	0	no	no	no	no		0	0
62	D	4	0	0	0	0	0	0	0	0	0	0	0	no	no	no	no		0	0
63	D	4	0	0	0	0	0	0	0	0	0	0	0	no	no	no	no		0	0
64	D	4	0	0	0	0	0	0	0	0	0	0	0	no	no	no	no		0	0
65		1	0	0	0	0	0	0	0	0	0	0	0	no	no	no	no		0	0
66		1	0	0	0	0	0	0	0	0	0	0	0	no	no	no	no		0	0
67		1	0	0	0	0	0	0	0	0	0	0	0	no	no	no	no		0	0
68		1	0	0	0	0	0	0	0	0	0	0	0	no	no	no	no		0	0
48harmful		3	0	0	0	0	0	0	0	0	0	0	0	no	no	no	no		0	0
48toxic		4	0	0	0	0	0	0	0	0	0	0	0	no	no	no	no		0	0
68harmful		2	0	0	0	0	0	0	0	0	0	0	0	no	no	no	no		0	0
68toxic		3	0	0	0	0	0	0	0	0	0	0	0	no	no	no	no		0	0
			0	0	0	0	0	0	0	0	0	0	0	no	no	no	no		0	0
			0	0	0	0	0	0	0	0	0	0	0	no	no	no	no		0	0
			0	0	0	0	0	0	0	0	0	0	0	no	no	no	no		0	0
			0	0	0	0	0	0	0	0	0	0	0	no	no	no	no		0	0
			0	0	0	0	0	0	0	0	0	0	0	no	no	no	no		0	0
			0	0	0	0	0	0	0	0	0	0	0	no	no	no	no		0	0
			0	0	0	0	0	0	0	0	0	0	0	no	no	no	no		0	0
			0	0	0	0	0	0	0	0	0	0	0	no	no	no	no		0	0
			0	0	0	0	0	0	0	0	0	0	0	no	no	no	no		0	0
			0	0	0	0	0	0	0	0	0	0	0	no	no	no	no		0	0
			0	0	0	0	0	0	0	0	0	0	0	no	no	no	no		0	0
			0	0	0	0	0	0	0	0	0	0	0	no	no	no	no		0	0
			0	0	0	0	0	0	0	0	0	0	0	no	no	no	no		0	0
			0	0	0	0	0	0	0	0	0	0	0	no	no	no	no		0	0
			0	0	0	0	0	0	0	0	0	0	0	no	no	no	no		0	0
			0	0	0	0	0	0	0	0	0	0	0	no	no	no	no		0	0
			0	0	0	0	0	0	0	0	0	0	0	no	no	no	no		0	0
			0	0	0	0	0	0	0	0	0	0	0	no	no	no	no		0	0
			0	0	0	0	0	0	0	0	0	0	0	no	no	no	no		0	0
			0	0	0	0	0	0	0	0	0	0	0	no	no	no	no		0	0
			0	0	0	0	0	0	0	0	0	0	0	no	no	no	no		0	0
			0	0	0	0	0	0	0	0	0	0	0	no	no	no	no		0	0
			0	0	0	0	0	0	0	0	0	0	0	no	no	no	no		0	0
			0	0	0	0	0	0	0	0	0	0	0	no	no	no	no		0	0
			0	0	0	0	0	0	0	0	0	0	0	no	no	no	no		0	0
			0	0	0	0	0	0	0	0	0	0	0	no	no	no	no		0	0

## Sheet: Substances
Substances and properties	aggregate state	Boiling Point		IF solid		Oppl-factor
Substance	at room temperature	Temp (°C)	Temp. (K)	texture	WH	*(0.1)
propylene	gas	-47.7	225.45		0.0625	0.1
oxygen	gas				0.0625	0.1
catalyst, metal oxyde	solid			Granules or flakes	0	0.1
acrolein	liquid	52	325.15		0.5	1
acrylic acid	liquid	141	414.15		0.25	1
phosphoric acid	liquid	213	486.15		0.25	1
acetaldehyde	gas	20.4	293.55		0.5	0.1
MDP	liquid	127.1	400.25		0.125	1
methane	gas				0.0625	0.1
methylvinylether	gas				0.0625	0.1
nitrogen	gas				0	0.1
propane	gas	-42	231.15		0.0625	0.1
water	liquid	100	373.15		0	1
sewage	liquid	100	373.15		0	1
inert gas	gas				0	0.1
byproducts	liquid	100	373.15		0	1
methanol	liquid	65	338.15		0.5	1
acetylene	gas				0.0625	0.1
acetic acid	liquid	118	391.15		0.25	1
carbon monoxide	gas				0.5	0.1
carbon dioxide	gas				0	0.1
dinitrogen monoxide	gas				0.0625	0.1
catalyst	solid			0	0	0.1
emissions, air unspec.	gas				0	0.1
potassium hydroxide	solid			Coarse Dust	0.25	0.1
glutaraldehyde	liquid	188	461.15		1	1
sodium hydroxide	solid			Firm granules or flakes	0.25	0.1
sodium phosphate	solid			Granules or flakes	0.25	0.1
sodium	solid			Fine dust	0.25	0.1
natural gas	gas				0.0625	0.1
air	gas				0	0.1
hydrogen	gas				0.0625	0.1
sodium chloride	solid			Firm granules or flakes	0	0.1
chlorine (Cl2)	gas				0.25	0.1
apatite	solid			Solid objects	0	0.1
sulfuric acid	liquid	337	610.15		0.25	1
sulfur dioxide	gas				0.25	0.1
sulfur trioxide	solid			Extremely dusty products	0.25	0.1
sulfur	solid	444.72	717.87	Firm granules or flakes	0.0625	0.1
potassium chloride	solid			Coarse Dust	0	0.1
potassium	solid			Coarse Dust	0.25	0.1
olive leaves	solid			Solid objects	0	0.1
olive leaves, dried	solid			Granules or flakes	0	0.1
olive leaves, dried, ground	solid			Fine dust	0	0.1
extract P0	liquid	100	373.15		0	1
extract P0, concentrated	liquid	100	373.15		0	1
enzyme	solid			Fine dust	1	0.1
adsorber	solid			Firm granules or flakes	0	0.1
ethanol	liquid	78	351.15		0.0625	1
op-agly	liquid	100	373.15		0	1
naphta	liquid	150	423.15		1	1
ethylene	gas				0.0625	0.1
ethane	gas				0.0625	0.1
1,3-butadiene	gas				1	0.1
butene	gas				0.0625	0.1
0	0				0	1
0	0				0	1
0	0				0	1
0	0				0	1
0	0				0	1
0	0				0	1
0	0				0	1
0	0				0	1
0	0				0	1
0	0				0	1
0	0				0	1
0	0				0	1
0	0				0	1
0	0				0	1
0	0				0	1
0	0				0	1
0	0				0	1
0	0				0	1
0	0				0	1
0	0				0	1
0	0				0	1
0	0				0	1
0	0				0	1
0	0				0	1
0	0				0	1
0	0				0	1
0	0				0	1
0	0				0	1
0	0				0	1
0	0				0	1
0	0				0	1
0	0				0	1
0	0				0	1
0	0				0	1
0	0				0	1
0	0				0	1
0	0				0	1
0	0				0	1
0	0				0	1
0	0				0	1
0	0				0	1
0	0				0	1
0	0				0	1

## Sheet: Inhalation-E,WE,HS
							intrinsic emission solid		intrinsic emission liquid
Step	Name	in/out	Substance	aggregate state	amount	Mix	texture	E solid	BP (K)	T (K)	ln(p) (atm)	p (Pa)	E	B (w/o mass fraction!)	mix?	fraction	B	WE	WH	HS Inhalation
1	upstream: ethanol	input	naphta	liquid	201	n			423.15	293.15	-4.70067	920.966	0.0306989	3.1978e-06	0	1	3.1978e-06	0.148901	1	0.148901
1	0	process	hydrogen	gas	4	y							1	1.45833e-07	147.9	0.0270453	3.94411e-09	0.0543331	0.0625	0.00339582
1	0	process	methane	gas	30.9	y							1	1.45833e-07	147.9	0.208925	3.04682e-08	0.0739105	0.0625	0.00461941
1	0	process	acetylene	gas	0.8	y							1	1.45833e-07	147.9	0.00540906	7.88821e-10	0.0426441	0.0625	0.00266526
1	0	process	propylene	gas	32.4	y							1	1.45833e-07	147.9	0.219067	3.19473e-08	0.0744397	0.0625	0.00465248
1	0	process	propane	gas	2.4	y							1	1.45833e-07	147.9	0.0162272	2.36646e-09	0.0503121	0.0625	0.00314451
1	0	process	1,3-butadiene	gas	8.6	y							1	1.45833e-07	147.9	0.0581474	8.47983e-09	0.0609679	1	0.0609679
1	0	process	butene	gas	11.1	y							1	1.45833e-07	147.9	0.0750507	1.09449e-08	0.0633552	0.0625	0.0039597
1	0	process	ethylene	gas	57.7	y							1	1.45833e-07	147.9	0.390128	5.68937e-08	0.0811949	0.0625	0.00507468
1	0	output	hydrogen	gas	4	y							1	0.000104167	90.2	0.0443459	4.61936e-06	0.157376	0.0625	0.00983602
1	0	output	methane	gas	30.9	y							1	0.000104167	90.2	0.342572	3.56846e-05	0.214083	0.0625	0.0133802
1	0	output	acetylene	gas	0.8	y							1	0.000104167	90.2	0.00886918	9.23873e-07	0.123519	0.0625	0.00771994
1	0	output	propylene	gas	32.4	y							1	0.000104167	90.2	0.359202	3.74169e-05	0.215616	0.0625	0.013476
1	0	output	propane	gas	2.4	y							1	0.000104167	90.2	0.0266075	2.77162e-06	0.14573	0.0625	0.00910811
1	0	output	1,3-butadiene	gas	8.6	y							1	0.000104167	90.2	0.0953437	9.93163e-06	0.176594	1	0.176594
1	0	output	butene	gas	11.1	y							1	0.000104167	90.2	0.12306	1.28187e-05	0.183509	0.0625	0.0114693
1	0	output	ethylene	gas	57.7	n							1	0.000104167	90.2	0.63969	6.66343e-05	0.235182	0.0625	0.0146989
2	drying	input	olive leaves	solid	400	n	Solid objects	0					0	0	0	1	0	0	0	0
2	0	process	olive leaves	solid	200	y	Solid objects	0					0	0	200	1	0	0	0	0
2	0	output	olive leaves, dried	solid	200	n	Granules or flakes	0.03					0.03	3.125e-06	0	1	3.125e-06	0.148386	0	0
2	0	output	water	liquid	200	n			373.15	293.15	-2.89272	5615.98	0.187199	1.94999e-05	0	1	1.94999e-05	0.19547	0	0
3	milling	input	olive leaves, dried	solid	200	n	Granules or flakes	0.03					0.03	3.125e-06	0	1	3.125e-06	0.148386	0	0
3	0	process	olive leaves, dried, ground	solid	200	y	Fine dust	0.3					0.3	0.0001875	200	1	0.0001875	0.274809	0	0
3	0	output	olive leaves, dried, ground	solid	200	n	Fine dust	0.3					0.3	3.125e-05	0	1	3.125e-05	0.209849	0	0
4	extraction	input	olive leaves, dried, ground	solid	200	n	Fine dust	0.3					0.3	3.125e-05	0	1	3.125e-05	0.209849	0	0
4	0	input	water	liquid	1800	n			373.15	293.15	-2.89272	5615.98	0.187199	1.94999e-05	0	1	1.94999e-05	0.19547	0	0
4	0	process	olive leaves, dried, ground	solid	200	y	Fine dust	0.3					0.3	0.000375	2000	0.1	3.75e-05	0.215688	0	0
4	0	process	water	liquid	1800	y			373.15	363.15	-0.29189	75674.6	2.52249	0.00315311	2000	0.9	0.0028378	0.413652	0	0
4	0	output	olive leaves, dried, ground	solid	200	y	Fine dust	0.3					0.3	3.125e-05	2000	0.1	3.125e-06	0.148386	0	0
4	0	output	water	liquid	1800	y			373.15	293.15	-2.89272	5615.98	0.187199	1.94999e-05	2000	0.9	1.75499e-05	0.192394	0	0
5	filtration	input	olive leaves, dried, ground	solid	200	y	Fine dust	0.3					0.3	3.125e-05	2000	0.1	3.125e-06	0.148386	0	0
5	0	input	water	liquid	1800	y			373.15	293.15	-2.89272	5615.98	0.187199	1.94999e-05	2000	0.9	1.75499e-05	0.192394	0	0
5	0	process	olive leaves, dried, ground	solid	200	y	Fine dust	0.3					0.3	0.0001875	2000	0.1	1.875e-05	0.194319	0	0
5	0	process	water	liquid	1800	y			373.15	293.15	-2.89272	5615.98	0.187199	0.000117	2000	0.9	0.0001053	0.251951	0	0
5	0	output	extract P0	liquid	1550	n			373.15	293.15	-2.89272	5615.98	0.187199	1.94999e-05	450	3.44444	6.71664e-05	0.235464	0	0
5	0	output	olive leaves, dried, ground	solid	200	y	Fine dust	0.3					0.3	3.125e-05	450	0.444444	1.38889e-05	0.185737	0	0
5	0	output	water	liquid	250	y			373.15	293.15	-2.89272	5615.98	0.187199	1.94999e-05	450	0.555556	1.08333e-05	0.178919	0	0
6	concentrating	input	extract P0	liquid	1550	n			373.15	293.15	-2.89272	5615.98	0.187199	1.94999e-05	0	1	1.94999e-05	0.19547	0	0
6	0	process	extract P0, concentrated	liquid	100	y			373.15	323.15	-1.64011	19653	0.655099	0.000409437	1550	0.0645161	2.64153e-05	0.204607	0	0
6	0	process	water	liquid	1450	y			373.15	323.15	-1.64011	19653	0.655099	0.000409437	1550	0.935484	0.000383021	0.306002	0	0
6	0	output	extract P0, concentrated	liquid	100	n			373.15	293.15	-2.89272	5615.98	0.187199	1.94999e-05	0	1	1.94999e-05	0.19547	0	0
6	0	output	water	liquid	1450	n			373.15	293.15	-2.89272	5615.98	0.187199	1.94999e-05	0	1	1.94999e-05	0.19547	0	0
7	biotransformation	input	extract P0, concentrated	liquid	100	n			373.15	293.15	-2.89272	5615.98	0.187199	1.94999e-05	0	1	1.94999e-05	0.19547	0	0
7	0	input	enzyme	solid	0.2	n	Fine dust	0.3					0.3	3.125e-05	0	1	3.125e-05	0.209849	1	0.209849
7	0	process	extract P0, concentrated	liquid	100	y			373.15	310.15	-2.15315	11765.6	0.392187	0.0117656	100.2	0.998004	0.0117421	0.512233	0	0
7	0	process	enzyme	solid	0.2	y	Fine dust	0.3					0.3	0.009	100.2	0.00199601	1.79641e-05	0.193071	1	0.193071
7	0	output	extract P0, concentrated	liquid	100	y			373.15	293.15	-2.89272	5615.98	0.187199	1.94999e-05	100.2	0.998004	1.9461e-05	0.195411	0	0
7	0	output	enzyme	solid	0.2	y	Fine dust	0.3					0.3	3.125e-05	100.2	0.00199601	6.23752e-08	0.0823268	1	0.0823268
8	denaturating	input	extract P0, concentrated	liquid	100	y			373.15	293.15	-2.89272	5615.98	0.187199	1.94999e-05	100.2	0.998004	1.9461e-05	0.195411	0	0
8	0	input	enzyme	solid	0.2	y	Fine dust	0.3					0.3	3.125e-05	100.2	0.00199601	6.23752e-08	0.0823268	1	0.0823268
8	0	process	extract P0, concentrated	liquid	100	y			373.15	293.15	-2.89272	5615.98	0.187199	0.000117	100.2	0.998004	0.000116766	0.255901	0	0
8	0	process	enzyme	solid	0.2	y	Fine dust	0.3					0.3	0.0001875	100.2	0.00199601	3.74251e-07	0.107811	1	0.107811
8	0	output	extract P0, concentrated	liquid	100	n			373.15	293.15	-2.89272	5615.98	0.187199	1.94999e-05	0	1	1.94999e-05	0.19547	0	0
9	adsorption	input	extract P0, concentrated	liquid	100	n			373.15	293.15	-2.89272	5615.98	0.187199	1.94999e-05	0	1	1.94999e-05	0.19547	0	0
9	0	input	adsorber	solid	30	n	Firm granules or flakes	0.01					0.01	1.04167e-06	0	1	1.04167e-06	0.12577	0	0
9	0	process	extract P0, concentrated	liquid	100	y			373.15	293.15	-2.89272	5615.98	0.187199	0.000467998	130	0.769231	0.000359999	0.30316	0	0
9	0	process	adsorber	solid	30	y	Firm granules or flakes	0.01					0.01	2.5e-05	130	0.230769	5.76923e-06	0.162731	0	0
9	0	output	extract P0, concentrated	liquid	100	y			373.15	293.15	-2.89272	5615.98	0.187199	1.94999e-05	100	1	1.94999e-05	0.19547	0	0
9	0	output	adsorber	solid	30	n	Firm granules or flakes	0.01					0.01	1.04167e-06	100	0.3	3.125e-07	0.104925	0	0
10	elution	input	extract P0, concentrated	liquid	100	n			373.15	293.15	-2.89272	5615.98	0.187199	1.94999e-05	0	1	1.94999e-05	0.19547	0	0
10	0	input	adsorber	solid	30	n	Firm granules or flakes	0.01					0.01	1.04167e-06	0	1	1.04167e-06	0.12577	0	0
10	0	input	ethanol	liquid	94.8	n			351.15	293.15	-2.09722	12442.4	0.414748	4.32029e-05	0	1	4.32029e-05	0.220333	0.0625	0.0137708
10	0	process	adsorber	solid	30	y	Firm granules or flakes	0.01					0.01	6.25e-06	124.8	0.240385	1.5024e-06	0.132898	0	0
10	0	process	ethanol	liquid	94.8	y			351.15	293.15	-2.09722	12442.4	0.414748	0.000259218	124.8	0.759615	0.000196906	0.276841	0.0625	0.0173026
10	0	output	adsorber	solid	30	n	Firm granules or flakes	0.01					0.01	1.04167e-06	0	1	1.04167e-06	0.12577	0	0
10	0	output	ethanol	liquid	94.8	n			351.15	293.15	-2.09722	12442.4	0.414748	4.32029e-05	0	1	4.32029e-05	0.220333	0.0625	0.0137708
11	vaporization	input	ethanol	liquid	94.8	n			351.15	293.15	-2.09722	12442.4	0.414748	4.32029e-05	0	1	4.32029e-05	0.220333	0.0625	0.0137708
11	0	process	ethanol	liquid	94.8	y			351.15	323.15	-0.918459	40442.2	1.34807	0.000842546	94.8	1	0.000842546	0.344553	0.0625	0.0215345
11	0	output	ethanol	liquid	94.8	n			351.15	323.15	-0.918459	40442.2	1.34807	0.000140424	0	1	0.000140424	0.263107	0.0625	0.0164442
11	0	output	op-agly	liquid	2.7	n			373.15	293.15	-2.89272	5615.98	0.187199	1.94999e-05	0	1	1.94999e-05	0.19547	0	0
0	0	0	0	#N/A	0	n	#N/A	#N/A	#N/A	#N/A	#N/A	#N/A	#N/A	#N/A	0	1		#N/A	0	0
0	0	0	0	#N/A	0	n	#N/A	#N/A	#N/A	#N/A	#N/A	#N/A	#N/A	#N/A	0	1		#N/A	0	0
0	0	0	0	#N/A	0	n	#N/A	#N/A	#N/A	#N/A	#N/A	#N/A	#N/A	#N/A	0	1		#N/A	0	0
0	0	0	0	#N/A	0	n	#N/A	#N/A	#N/A	#N/A	#N/A	#N/A	#N/A	#N/A	0	1		#N/A	0	0
0	0	0	0	#N/A	0	n	#N/A	#N/A	#N/A	#N/A	#N/A	#N/A	#N/A	#N/A	0	1		#N/A	0	0
0	0	0	0	#N/A	0	n	#N/A	#N/A	#N/A	#N/A	#N/A	#N/A	#N/A	#N/A	0	1		#N/A	0	0
0	0	0	0	#N/A	0	n	#N/A	#N/A	#N/A	#N/A	#N/A	#N/A	#N/A	#N/A	0	1		#N/A	0	0
0	0	0	0	#N/A	0	n	#N/A	#N/A	#N/A	#N/A	#N/A	#N/A	#N/A	#N/A	0	1		#N/A	0	0
0	0	0	0	#N/A	0	n	#N/A	#N/A	#N/A	#N/A	#N/A	#N/A	#N/A	#N/A	0	1		#N/A	0	0
0	0	0	0	#N/A	0	n	#N/A	#N/A	#N/A	#N/A	#N/A	#N/A	#N/A	#N/A	0	1		#N/A	0	0
0	0	0	0	#N/A	0	n	#N/A	#N/A	#N/A	#N/A	#N/A	#N/A	#N/A	#N/A	0	1		#N/A	0	0
0	0	0	0	#N/A	0	n	#N/A	#N/A	#N/A	#N/A	#N/A	#N/A	#N/A	#N/A	0	1		#N/A	0	0
0	0	0	0	#N/A	0	n	#N/A	#N/A	#N/A	#N/A	#N/A	#N/A	#N/A	#N/A	0	1		#N/A	0	0
0	0	0	0	#N/A	0	n	#N/A	#N/A	#N/A	#N/A	#N/A	#N/A	#N/A	#N/A	0	1		#N/A	0	0
0	0	0	0	#N/A	0	n	#N/A	#N/A	#N/A	#N/A	#N/A	#N/A	#N/A	#N/A	0	1		#N/A	0	0
0	0	0	0	#N/A	0	n	#N/A	#N/A	#N/A	#N/A	#N/A	#N/A	#N/A	#N/A	0	1		#N/A	0	0
0	0	0	0	#N/A	0	n	#N/A	#N/A	#N/A	#N/A	#N/A	#N/A	#N/A	#N/A	0	1		#N/A	0	0
0	0	0	0	#N/A	0	n	#N/A	#N/A	#N/A	#N/A	#N/A	#N/A	#N/A	#N/A	0	1		#N/A	0	0
0	0	0	0	#N/A	0	n	#N/A	#N/A	#N/A	#N/A	#N/A	#N/A	#N/A	#N/A	0	1		#N/A	0	0
0	0	0	0	#N/A	0	n	#N/A	#N/A	#N/A	#N/A	#N/A	#N/A	#N/A	#N/A	0	1		#N/A	0	0
0	0	0	0	#N/A	0	n	#N/A	#N/A	#N/A	#N/A	#N/A	#N/A	#N/A	#N/A	0	1		#N/A	0	0
0	0	0	0	#N/A	0	n	#N/A	#N/A	#N/A	#N/A	#N/A	#N/A	#N/A	#N/A	0	1		#N/A	0	0
0	0	0	0	#N/A	0	n	#N/A	#N/A	#N/A	#N/A	#N/A	#N/A	#N/A	#N/A	0	1		#N/A	0	0
0	0	0	0	#N/A	0	n	#N/A	#N/A	#N/A	#N/A	#N/A	#N/A	#N/A	#N/A	0	1		#N/A	0	0
0	0	0	0	#N/A	0	n	#N/A	#N/A	#N/A	#N/A	#N/A	#N/A	#N/A	#N/A	0	1		#N/A	0	0
0	0	0	0	#N/A	0	n	#N/A	#N/A	#N/A	#N/A	#N/A	#N/A	#N/A	#N/A	0	1		#N/A	0	0
0	0	0	0	#N/A	0	n	#N/A	#N/A	#N/A	#N/A	#N/A	#N/A	#N/A	#N/A	0	1		#N/A	0	0
0	0	0	0	#N/A	0	n	#N/A	#N/A	#N/A	#N/A	#N/A	#N/A	#N/A	#N/A	0	1		#N/A	0	0
0	0	0	0	#N/A	0	n	#N/A	#N/A	#N/A	#N/A	#N/A	#N/A	#N/A	#N/A	0	1		#N/A	0	0
0	0	0	0	#N/A	0	n	#N/A	#N/A	#N/A	#N/A	#N/A	#N/A	#N/A	#N/A	0	1		#N/A	0	0
0	0	0	0	#N/A	0	n	#N/A	#N/A	#N/A	#N/A	#N/A	#N/A	#N/A	#N/A	0	1		#N/A	0	0
0	0	0	0	#N/A	0	n	#N/A	#N/A	#N/A	#N/A	#N/A	#N/A	#N/A	#N/A	0	1		#N/A	0	0
0	0	0	0	#N/A	0	n	#N/A	#N/A	#N/A	#N/A	#N/A	#N/A	#N/A	#N/A	0	1		#N/A	0	0
0	0	0	0	#N/A	0	n	#N/A	#N/A	#N/A	#N/A	#N/A	#N/A	#N/A	#N/A	0	1		#N/A	0	0
0	0	0	0	#N/A	0	n	#N/A	#N/A	#N/A	#N/A	#N/A	#N/A	#N/A	#N/A	0	1		#N/A	0	0
0	0	0	0	#N/A	0	n	#N/A	#N/A	#N/A	#N/A	#N/A	#N/A	#N/A	#N/A	0	1		#N/A	0	0
0	0	0	0	#N/A	0	n	#N/A	#N/A	#N/A	#N/A	#N/A	#N/A	#N/A	#N/A	0	1		#N/A	0	0
0	0	0	0	#N/A	0	n	#N/A	#N/A	#N/A	#N/A	#N/A	#N/A	#N/A	#N/A	0	1		#N/A	0	0
0	0	0	0	#N/A	0	n	#N/A	#N/A	#N/A	#N/A	#N/A	#N/A	#N/A	#N/A	0	1		#N/A	0	0
0	0	0	0	#N/A	0	n	#N/A	#N/A	#N/A	#N/A	#N/A	#N/A	#N/A	#N/A	0	1		#N/A	0	0
0	0	0	0	#N/A	0	n	#N/A	#N/A	#N/A	#N/A	#N/A	#N/A	#N/A	#N/A	0	1		#N/A	0	0
0	0	0	0	#N/A	0	n	#N/A	#N/A	#N/A	#N/A	#N/A	#N/A	#N/A	#N/A	0	1		#N/A	0	0
0	0	0	0	#N/A	0	n	#N/A	#N/A	#N/A	#N/A	#N/A	#N/A	#N/A	#N/A	0	1		#N/A	0	0
0	0	0	0	#N/A	0	n	#N/A	#N/A	#N/A	#N/A	#N/A	#N/A	#N/A	#N/A	0	1		#N/A	0	0
0	0	0	0	#N/A	0	n	#N/A	#N/A	#N/A	#N/A	#N/A	#N/A	#N/A	#N/A	0	1		#N/A	0	0
0	0	0	0	#N/A	0	n	#N/A	#N/A	#N/A	#N/A	#N/A	#N/A	#N/A	#N/A	0	1		#N/A	0	0
0	0	0	0	#N/A	0	n	#N/A	#N/A	#N/A	#N/A	#N/A	#N/A	#N/A	#N/A	0	1		#N/A	0	0
0	0	0	0	#N/A	0	n	#N/A	#N/A	#N/A	#N/A	#N/A	#N/A	#N/A	#N/A	0	1		#N/A	0	0
0	0	0	0	#N/A	0	n	#N/A	#N/A	#N/A	#N/A	#N/A	#N/A	#N/A	#N/A	0	1		#N/A	0	0
0	0	0	0	#N/A	0	n	#N/A	#N/A	#N/A	#N/A	#N/A	#N/A	#N/A	#N/A	0	1		#N/A	0	0
0	0	0	0	#N/A	0	n	#N/A	#N/A	#N/A	#N/A	#N/A	#N/A	#N/A	#N/A	0	1		#N/A	0	0
0	0	0	0	#N/A	0	n	#N/A	#N/A	#N/A	#N/A	#N/A	#N/A	#N/A	#N/A	0	1		#N/A	0	0
0	0	0	0	#N/A	0	n	#N/A	#N/A	#N/A	#N/A	#N/A	#N/A	#N/A	#N/A	0	1		#N/A	0	0
0	0	0	0	#N/A	0	n	#N/A	#N/A	#N/A	#N/A	#N/A	#N/A	#N/A	#N/A	0	1		#N/A	0	0
0	0	0	0	#N/A	0	n	#N/A	#N/A	#N/A	#N/A	#N/A	#N/A	#N/A	#N/A	0	1		#N/A	0	0
0	0	0	0	#N/A	0	n	#N/A	#N/A	#N/A	#N/A	#N/A	#N/A	#N/A	#N/A	0	1		#N/A	0	0
0	0	0	0	#N/A	0	n	#N/A	#N/A	#N/A	#N/A	#N/A	#N/A	#N/A	#N/A	0	1		#N/A	0	0
0	0	0	0	#N/A	0	n	#N/A	#N/A	#N/A	#N/A	#N/A	#N/A	#N/A	#N/A	0	1		#N/A	0	0
0	0	0	0	#N/A	0	n	#N/A	#N/A	#N/A	#N/A	#N/A	#N/A	#N/A	#N/A	0	1		#N/A	0	0
0	0	0	0	#N/A	0	n	#N/A	#N/A	#N/A	#N/A	#N/A	#N/A	#N/A	#N/A	0	1		#N/A	0	0
0	0	0	0	#N/A	0	n	#N/A	#N/A	#N/A	#N/A	#N/A	#N/A	#N/A	#N/A	0	1		#N/A	0	0
0	0	0	0	#N/A	0	n	#N/A	#N/A	#N/A	#N/A	#N/A	#N/A	#N/A	#N/A	0	1		#N/A	0	0
0	0	0	0	#N/A	0	n	#N/A	#N/A	#N/A	#N/A	#N/A	#N/A	#N/A	#N/A	0	1		#N/A	0	0
0	0	0	0	#N/A	0	n	#N/A	#N/A	#N/A	#N/A	#N/A	#N/A	#N/A	#N/A	0	1		#N/A	0	0
0	0	0	0	#N/A	0	n	#N/A	#N/A	#N/A	#N/A	#N/A	#N/A	#N/A	#N/A	0	1		#N/A	0	0
0	0	0	0	#N/A	0	n	#N/A	#N/A	#N/A	#N/A	#N/A	#N/A	#N/A	#N/A	0	1		#N/A	0	0
0	0	0	0	#N/A	0	n	#N/A	#N/A	#N/A	#N/A	#N/A	#N/A	#N/A	#N/A	0	1		#N/A	0	0
0	0	0	0	#N/A	0	n	#N/A	#N/A	#N/A	#N/A	#N/A	#N/A	#N/A	#N/A	0	1		#N/A	0	0
0	0	0	0	#N/A	0	n	#N/A	#N/A	#N/A	#N/A	#N/A	#N/A	#N/A	#N/A	0	1		#N/A	0	0
0	0	0	0	#N/A	0	n	#N/A	#N/A	#N/A	#N/A	#N/A	#N/A	#N/A	#N/A	0	1		#N/A	0	0
0	0	0	0	#N/A	0	n	#N/A	#N/A	#N/A	#N/A	#N/A	#N/A	#N/A	#N/A	0	1		#N/A	0	0
0	0	0	0	#N/A	0	n	#N/A	#N/A	#N/A	#N/A	#N/A	#N/A	#N/A	#N/A	0	1		#N/A	0	0
0	0	0	0	#N/A	0	n	#N/A	#N/A	#N/A	#N/A	#N/A	#N/A	#N/A	#N/A	0	1		#N/A	0	0
0	0	0	0	#N/A	0	n	#N/A	#N/A	#N/A	#N/A	#N/A	#N/A	#N/A	#N/A	0	1		#N/A	0	0
0	0	0	0	#N/A	0	n	#N/A	#N/A	#N/A	#N/A	#N/A	#N/A	#N/A	#N/A	0	1		#N/A	0	0
0	0	0	0	#N/A	0	n	#N/A	#N/A	#N/A	#N/A	#N/A	#N/A	#N/A	#N/A	0	1		#N/A	0	0
0	0	0	0	#N/A	0	n	#N/A	#N/A	#N/A	#N/A	#N/A	#N/A	#N/A	#N/A	0	1		#N/A	0	0
0	0	0	0	#N/A	0	n	#N/A	#N/A	#N/A	#N/A	#N/A	#N/A	#N/A	#N/A	0	1		#N/A	0	0
0	0	0	0	#N/A	0	n	#N/A	#N/A	#N/A	#N/A	#N/A	#N/A	#N/A	#N/A	0	1		#N/A	0	0
0	0	0	0	#N/A	0	n	#N/A	#N/A	#N/A	#N/A	#N/A	#N/A	#N/A	#N/A	0	1		#N/A	0	0
0	0	0	0	#N/A	0	n	#N/A	#N/A	#N/A	#N/A	#N/A	#N/A	#N/A	#N/A	0	1		#N/A	0	0
0	0	0	0	#N/A	0	n	#N/A	#N/A	#N/A	#N/A	#N/A	#N/A	#N/A	#N/A	0	1		#N/A	0	0
0	0	0	0	#N/A	0	n	#N/A	#N/A	#N/A	#N/A	#N/A	#N/A	#N/A	#N/A	0	1		#N/A	0	0
0	0	0	0	#N/A	0	n	#N/A	#N/A	#N/A	#N/A	#N/A	#N/A	#N/A	#N/A	0	1		#N/A	0	0
0	0	0	0	#N/A	0	n	#N/A	#N/A	#N/A	#N/A	#N/A	#N/A	#N/A	#N/A	0	1		#N/A	0	0
0	0	0	0	#N/A	0	n	#N/A	#N/A	#N/A	#N/A	#N/A	#N/A	#N/A	#N/A	0	1		#N/A	0	0
0	0	0	0	#N/A	0	n	#N/A	#N/A	#N/A	#N/A	#N/A	#N/A	#N/A	#N/A	0	1		#N/A	0	0
0	0	0	0	#N/A	0	n	#N/A	#N/A	#N/A	#N/A	#N/A	#N/A	#N/A	#N/A	0	1		#N/A	0	0
0	0	0	0	#N/A	0	n	#N/A	#N/A	#N/A	#N/A	#N/A	#N/A	#N/A	#N/A	0	1		#N/A	0	0
0	0	0	0	#N/A	0	n	#N/A	#N/A	#N/A	#N/A	#N/A	#N/A	#N/A	#N/A	0	1		#N/A	0	0
0	0	0	0	#N/A	0	n	#N/A	#N/A	#N/A	#N/A	#N/A	#N/A	#N/A	#N/A	0	1		#N/A	0	0
0	0	0	0	#N/A	0	n	#N/A	#N/A	#N/A	#N/A	#N/A	#N/A	#N/A	#N/A	0	1		#N/A	0	0
0	0	0	0	#N/A	0	n	#N/A	#N/A	#N/A	#N/A	#N/A	#N/A	#N/A	#N/A	0	1		#N/A	0	0
0	0	0	0	#N/A	0	n	#N/A	#N/A	#N/A	#N/A	#N/A	#N/A	#N/A	#N/A	0	1		#N/A	0	0
0	0	0	0	#N/A	0	n	#N/A	#N/A	#N/A	#N/A	#N/A	#N/A	#N/A	#N/A	0	1		#N/A	0	0
0	0	0	0	#N/A	0	n	#N/A	#N/A	#N/A	#N/A	#N/A	#N/A	#N/A	#N/A	0	1		#N/A	0	0
0	0	0	0	#N/A	0	n	#N/A	#N/A	#N/A	#N/A	#N/A	#N/A	#N/A	#N/A	0	1		#N/A	0	0
0	0	0	0	#N/A	0	n	#N/A	#N/A	#N/A	#N/A	#N/A	#N/A	#N/A	#N/A	0	1		#N/A	0	0
0	0	0	0	#N/A	0	n	#N/A	#N/A	#N/A	#N/A	#N/A	#N/A	#N/A	#N/A	0	1		#N/A	0	0
0	0	0	0	#N/A	0	n	#N/A	#N/A	#N/A	#N/A	#N/A	#N/A	#N/A	#N/A	0	1		#N/A	0	0
0	0	0	0	#N/A	0	n	#N/A	#N/A	#N/A	#N/A	#N/A	#N/A	#N/A	#N/A	0	1		#N/A	0	0
0	0	0	0	#N/A	0	n	#N/A	#N/A	#N/A	#N/A	#N/A	#N/A	#N/A	#N/A	0	1		#N/A	0	0
0	0	0	0	#N/A	0	n	#N/A	#N/A	#N/A	#N/A	#N/A	#N/A	#N/A	#N/A	0	1		#N/A	0	0
0	0	0	0	#N/A	0	n	#N/A	#N/A	#N/A	#N/A	#N/A	#N/A	#N/A	#N/A	0	1		#N/A	0	0
0	0	0	0	#N/A	0	n	#N/A	#N/A	#N/A	#N/A	#N/A	#N/A	#N/A	#N/A	0	1		#N/A	0	0
0	0	0	0	#N/A	0	n	#N/A	#N/A	#N/A	#N/A	#N/A	#N/A	#N/A	#N/A	0	1		#N/A	0	0
0	0	0	0	#N/A	0	n	#N/A	#N/A	#N/A	#N/A	#N/A	#N/A	#N/A	#N/A	0	1		#N/A	0	0
0	0	0	0	#N/A	0	n	#N/A	#N/A	#N/A	#N/A	#N/A	#N/A	#N/A	#N/A	0	1		#N/A	0	0
0	0	0	0	#N/A	0	n	#N/A	#N/A	#N/A	#N/A	#N/A	#N/A	#N/A	#N/A	0	1		#N/A	0	0
0	0	0	0	#N/A	0	n	#N/A	#N/A	#N/A	#N/A	#N/A	#N/A	#N/A	#N/A	0	1		#N/A	0	0
0	0	0	0	#N/A	0	n	#N/A	#N/A	#N/A	#N/A	#N/A	#N/A	#N/A	#N/A	0	1		#N/A	0	0
0	0	0	0	#N/A	0	n	#N/A	#N/A	#N/A	#N/A	#N/A	#N/A	#N/A	#N/A	0	1		#N/A	0	0
0	0	0	0	#N/A	0	n	#N/A	#N/A	#N/A	#N/A	#N/A	#N/A	#N/A	#N/A	0	1		#N/A	0	0
0	0	0	0	#N/A	0	n	#N/A	#N/A	#N/A	#N/A	#N/A	#N/A	#N/A	#N/A	0	1		#N/A	0	0
0	0	0	0	#N/A	0	n	#N/A	#N/A	#N/A	#N/A	#N/A	#N/A	#N/A	#N/A	0	1		#N/A	0	0
0	0	0	0	#N/A	0	n	#N/A	#N/A	#N/A	#N/A	#N/A	#N/A	#N/A	#N/A	0	1		#N/A	0	0
0	0	0	0	#N/A	0	n	#N/A	#N/A	#N/A	#N/A	#N/A	#N/A	#N/A	#N/A	0	1		#N/A	0	0
0	0	0	0	#N/A	0	n	#N/A	#N/A	#N/A	#N/A	#N/A	#N/A	#N/A	#N/A	0	1		#N/A	0	0
0	0	0	0	#N/A	0	n	#N/A	#N/A	#N/A	#N/A	#N/A	#N/A	#N/A	#N/A	0	1		#N/A	0	0
0	0	0	0	#N/A	0	n	#N/A	#N/A	#N/A	#N/A	#N/A	#N/A	#N/A	#N/A	0	1		#N/A	0	0
0	0	0	0	#N/A	0	n	#N/A	#N/A	#N/A	#N/A	#N/A	#N/A	#N/A	#N/A	0	1		#N/A	0	0
0	0	0	0	#N/A	0	n	#N/A	#N/A	#N/A	#N/A	#N/A	#N/A	#N/A	#N/A	0	1		#N/A	0	0
0	0	0	0	#N/A	0	n	#N/A	#N/A	#N/A	#N/A	#N/A	#N/A	#N/A	#N/A	0	1		#N/A	0	0
0	0	0	0	#N/A	0	n	#N/A	#N/A	#N/A	#N/A	#N/A	#N/A	#N/A	#N/A	0	1		#N/A	0	0
0	0	0	0	#N/A	0	n	#N/A	#N/A	#N/A	#N/A	#N/A	#N/A	#N/A	#N/A	0	1		#N/A	0	0
0	0	0	0	#N/A	0	n	#N/A	#N/A	#N/A	#N/A	#N/A	#N/A	#N/A	#N/A	0	1		#N/A	0	0
0	0	0	0	#N/A	0	n	#N/A	#N/A	#N/A	#N/A	#N/A	#N/A	#N/A	#N/A	0	1		#N/A	0	0
0	0	0	0	#N/A	0	n	#N/A	#N/A	#N/A	#N/A	#N/A	#N/A	#N/A	#N/A	0	1		#N/A	0	0
0	0	0	0	#N/A	0	n	#N/A	#N/A	#N/A	#N/A	#N/A	#N/A	#N/A	#N/A	0	1		#N/A	0	0
0	0	0	0	#N/A	0	n	#N/A	#N/A	#N/A	#N/A	#N/A	#N/A	#N/A	#N/A	0	1		#N/A	0	0
0	0	0	0	#N/A	0	n	#N/A	#N/A	#N/A	#N/A	#N/A	#N/A	#N/A	#N/A	0	1		#N/A	0	0
0	0	0	0	#N/A	0	n	#N/A	#N/A	#N/A	#N/A	#N/A	#N/A	#N/A	#N/A	0	1		#N/A	0	0
0	0	0	0	#N/A	0	n	#N/A	#N/A	#N/A	#N/A	#N/A	#N/A	#N/A	#N/A	0	1		#N/A	0	0
0	0	0	0	#N/A	0	n	#N/A	#N/A	#N/A	#N/A	#N/A	#N/A	#N/A	#N/A	0	1		#N/A	0	0
0	0	0	0	#N/A	0	n	#N/A	#N/A	#N/A	#N/A	#N/A	#N/A	#N/A	#N/A	0	1		#N/A	0	0
0	0	0	0	#N/A	0	n	#N/A	#N/A	#N/A	#N/A	#N/A	#N/A	#N/A	#N/A	0	1		#N/A	0	0
0	0	0	0	#N/A	0	n	#N/A	#N/A	#N/A	#N/A	#N/A	#N/A	#N/A	#N/A	0	1		#N/A	0	0
0	0	0	0	#N/A	0	n	#N/A	#N/A	#N/A	#N/A	#N/A	#N/A	#N/A	#N/A	0	1		#N/A	0	0
0	0	0	0	#N/A	0	n	#N/A	#N/A	#N/A	#N/A	#N/A	#N/A	#N/A	#N/A	0	1		#N/A	0	0
0	0	0	0	#N/A	0	n	#N/A	#N/A	#N/A	#N/A	#N/A	#N/A	#N/A	#N/A	0	1		#N/A	0	0
0	0	0	0	#N/A	0	n	#N/A	#N/A	#N/A	#N/A	#N/A	#N/A	#N/A	#N/A	0	1		#N/A	0	0
0	0	0	0	#N/A	0	n	#N/A	#N/A	#N/A	#N/A	#N/A	#N/A	#N/A	#N/A	0	1		#N/A	0	0
0	0	0	0	#N/A	0	n	#N/A	#N/A	#N/A	#N/A	#N/A	#N/A	#N/A	#N/A	0	1		#N/A	0	0
0	0	0	0	#N/A	0	n	#N/A	#N/A	#N/A	#N/A	#N/A	#N/A	#N/A	#N/A	0	1		#N/A	0	0
0	0	0	0	#N/A	0	n	#N/A	#N/A	#N/A	#N/A	#N/A	#N/A	#N/A	#N/A	0	1		#N/A	0	0
0	0	0	0	#N/A	0	n	#N/A	#N/A	#N/A	#N/A	#N/A	#N/A	#N/A	#N/A	0	1		#N/A	0	0
0	0	0	0	#N/A	0	n	#N/A	#N/A	#N/A	#N/A	#N/A	#N/A	#N/A	#N/A	0	1		#N/A	0	0
0	0	0	0	#N/A	0	n	#N/A	#N/A	#N/A	#N/A	#N/A	#N/A	#N/A	#N/A	0	1		#N/A	0	0
0	0	0	0	#N/A	0	n	#N/A	#N/A	#N/A	#N/A	#N/A	#N/A	#N/A	#N/A	0	1		#N/A	0	0
0	0	0	0	#N/A	0	n	#N/A	#N/A	#N/A	#N/A	#N/A	#N/A	#N/A	#N/A	0	1		#N/A	0	0
0	0	0	0	#N/A	0	n	#N/A	#N/A	#N/A	#N/A	#N/A	#N/A	#N/A	#N/A	0	1		#N/A	0	0
0	0	0	0	#N/A	0	n	#N/A	#N/A	#N/A	#N/A	#N/A	#N/A	#N/A	#N/A	0	1		#N/A	0	0
0	0	0	0	#N/A	0	n	#N/A	#N/A	#N/A	#N/A	#N/A	#N/A	#N/A	#N/A	0	1		#N/A	0	0
0	0	0	0	#N/A	0	n	#N/A	#N/A	#N/A	#N/A	#N/A	#N/A	#N/A	#N/A	0	1		#N/A	0	0
0	0	0	0	#N/A	0	n	#N/A	#N/A	#N/A	#N/A	#N/A	#N/A	#N/A	#N/A	0	1		#N/A	0	0
0	0	0	0	#N/A	0	n	#N/A	#N/A	#N/A	#N/A	#N/A	#N/A	#N/A	#N/A	0	1		#N/A	0	0
0	0	0	0	#N/A	0	n	#N/A	#N/A	#N/A	#N/A	#N/A	#N/A	#N/A	#N/A	0	1		#N/A	0	0
0	0	0	0	#N/A	0	n	#N/A	#N/A	#N/A	#N/A	#N/A	#N/A	#N/A	#N/A	0	1		#N/A	0	0
0	0	0	0	#N/A	0	n	#N/A	#N/A	#N/A	#N/A	#N/A	#N/A	#N/A	#N/A	0	1		#N/A	0	0
0	0	0	0	#N/A	0	n	#N/A	#N/A	#N/A	#N/A	#N/A	#N/A	#N/A	#N/A	0	1		#N/A	0	0
0	0	0	0	#N/A	0	n	#N/A	#N/A	#N/A	#N/A	#N/A	#N/A	#N/A	#N/A	0	1		#N/A	0	0
0	0	0	0	#N/A	0	n	#N/A	#N/A	#N/A	#N/A	#N/A	#N/A	#N/A	#N/A	0	1		#N/A	0	0
0	0	0	0	#N/A	0	n	#N/A	#N/A	#N/A	#N/A	#N/A	#N/A	#N/A	#N/A	0	1		#N/A	0	0
0	0	0	0	#N/A	0	n	#N/A	#N/A	#N/A	#N/A	#N/A	#N/A	#N/A	#N/A	0	1		#N/A	0	0
0	0	0	0	#N/A	0	n	#N/A	#N/A	#N/A	#N/A	#N/A	#N/A	#N/A	#N/A	0	1		#N/A	0	0
0	0	0	0	#N/A	0	n	#N/A	#N/A	#N/A	#N/A	#N/A	#N/A	#N/A	#N/A	0	1		#N/A	0	0
0	0	0	0	#N/A	0	n	#N/A	#N/A	#N/A	#N/A	#N/A	#N/A	#N/A	#N/A	0	1		#N/A	0	0
0	0	0	0	#N/A	0	n	#N/A	#N/A	#N/A	#N/A	#N/A	#N/A	#N/A	#N/A	0	1		#N/A	0	0
0	0	0	0	#N/A	0	n	#N/A	#N/A	#N/A	#N/A	#N/A	#N/A	#N/A	#N/A	0	1		#N/A	0	0
0	0	0	0	#N/A	0	n	#N/A	#N/A	#N/A	#N/A	#N/A	#N/A	#N/A	#N/A	0	1		#N/A	0	0
0	0	0	0	#N/A	0	n	#N/A	#N/A	#N/A	#N/A	#N/A	#N/A	#N/A	#N/A	0	1		#N/A	0	0
0	0	0	0	#N/A	0	n	#N/A	#N/A	#N/A	#N/A	#N/A	#N/A	#N/A	#N/A	0	1		#N/A	0	0
0	0	0	0	#N/A	0	n	#N/A	#N/A	#N/A	#N/A	#N/A	#N/A	#N/A	#N/A	0	1		#N/A	0	0
0	0	0	0	#N/A	0	n	#N/A	#N/A	#N/A	#N/A	#N/A	#N/A	#N/A	#N/A	0	1		#N/A	0	0
0	0	0	0	#N/A	0	n	#N/A	#N/A	#N/A	#N/A	#N/A	#N/A	#N/A	#N/A	0	1		#N/A	0	0
0	0	0	0	#N/A	0	n	#N/A	#N/A	#N/A	#N/A	#N/A	#N/A	#N/A	#N/A	0	1		#N/A	0	0
0	0	0	0	#N/A	0	n	#N/A	#N/A	#N/A	#N/A	#N/A	#N/A	#N/A	#N/A	0	1		#N/A	0	0
0	0	0	0	#N/A	0	n	#N/A	#N/A	#N/A	#N/A	#N/A	#N/A	#N/A	#N/A	0	1		#N/A	0	0
0	0	0	0	#N/A	0	n	#N/A	#N/A	#N/A	#N/A	#N/A	#N/A	#N/A	#N/A	0	1		#N/A	0	0
0	0	0	0	#N/A	0	n	#N/A	#N/A	#N/A	#N/A	#N/A	#N/A	#N/A	#N/A	0	1		#N/A	0	0
0	0	0	0	#N/A	0	n	#N/A	#N/A	#N/A	#N/A	#N/A	#N/A	#N/A	#N/A	0	1		#N/A	0	0
0	0	0	0	#N/A	0	n	#N/A	#N/A	#N/A	#N/A	#N/A	#N/A	#N/A	#N/A	0	1		#N/A	0	0
0	0	0	0	#N/A	0	n	#N/A	#N/A	#N/A	#N/A	#N/A	#N/A	#N/A	#N/A	0	1		#N/A	0	0
0	0	0	0	#N/A	0	n	#N/A	#N/A	#N/A	#N/A	#N/A	#N/A	#N/A	#N/A	0	1		#N/A	0	0
0	0	0	0	#N/A	0	n	#N/A	#N/A	#N/A	#N/A	#N/A	#N/A	#N/A	#N/A	0	1		#N/A	0	0
0	0	0	0	#N/A	0	n	#N/A	#N/A	#N/A	#N/A	#N/A	#N/A	#N/A	#N/A	0	1		#N/A	0	0
0	0	0	0	#N/A	0	n	#N/A	#N/A	#N/A	#N/A	#N/A	#N/A	#N/A	#N/A	0	1		#N/A	0	0
0	0	0	0	#N/A	0	n	#N/A	#N/A	#N/A	#N/A	#N/A	#N/A	#N/A	#N/A	0	1		#N/A	0	0
0	0	0	0	#N/A	0	n	#N/A	#N/A	#N/A	#N/A	#N/A	#N/A	#N/A	#N/A	0	1		#N/A	0	0
0	0	0	0	#N/A	0	n	#N/A	#N/A	#N/A	#N/A	#N/A	#N/A	#N/A	#N/A	0	1		#N/A	0	0
0	0	0	0	#N/A	0	n	#N/A	#N/A	#N/A	#N/A	#N/A	#N/A	#N/A	#N/A	0	1		#N/A	0	0
0	0	0	0	#N/A	0	n	#N/A	#N/A	#N/A	#N/A	#N/A	#N/A	#N/A	#N/A	0	1		#N/A	0	0
0	0	0	0	#N/A	0	n	#N/A	#N/A	#N/A	#N/A	#N/A	#N/A	#N/A	#N/A	0	1		#N/A	0	0
0	0	0	0	#N/A	0	n	#N/A	#N/A	#N/A	#N/A	#N/A	#N/A	#N/A	#N/A	0	1		#N/A	0	0
0	0	0	0	#N/A	0	n	#N/A	#N/A	#N/A	#N/A	#N/A	#N/A	#N/A	#N/A	0	1		#N/A	0	0
0	0	0	0	#N/A	0	n	#N/A	#N/A	#N/A	#N/A	#N/A	#N/A	#N/A	#N/A	0	1		#N/A	0	0
0	0	0	0	#N/A	0	n	#N/A	#N/A	#N/A	#N/A	#N/A	#N/A	#N/A	#N/A	0	1		#N/A	0	0
0	0	0	0	#N/A	0	n	#N/A	#N/A	#N/A	#N/A	#N/A	#N/A	#N/A	#N/A	0	1		#N/A	0	0
0	0	0	0	#N/A	0	n	#N/A	#N/A	#N/A	#N/A	#N/A	#N/A	#N/A	#N/A	0	1		#N/A	0	0
0	0	0	0	#N/A	0	n	#N/A	#N/A	#N/A	#N/A	#N/A	#N/A	#N/A	#N/A	0	1		#N/A	0	0
0	0	0	0	#N/A	0	n	#N/A	#N/A	#N/A	#N/A	#N/A	#N/A	#N/A	#N/A	0	1		#N/A	0	0
0	0	0	0	#N/A	0	n	#N/A	#N/A	#N/A	#N/A	#N/A	#N/A	#N/A	#N/A	0	1		#N/A	0	0
0	0	0	0	#N/A	0	n	#N/A	#N/A	#N/A	#N/A	#N/A	#N/A	#N/A	#N/A	0	1		#N/A	0	0
0	0	0	0	#N/A	0	n	#N/A	#N/A	#N/A	#N/A	#N/A	#N/A	#N/A	#N/A	0	1		#N/A	0	0
0	0	0	0	#N/A	0	n	#N/A	#N/A	#N/A	#N/A	#N/A	#N/A	#N/A	#N/A	0	1		#N/A	0	0
0	0	0	0	#N/A	0	n	#N/A	#N/A	#N/A	#N/A	#N/A	#N/A	#N/A	#N/A	0	1		#N/A	0	0
0	0	0	0	#N/A	0	n	#N/A	#N/A	#N/A	#N/A	#N/A	#N/A	#N/A	#N/A	0	1		#N/A	0	0
0	0	0	0	#N/A	0	n	#N/A	#N/A	#N/A	#N/A	#N/A	#N/A	#N/A	#N/A	0	1		#N/A	0	0
0	0	0	0	#N/A	0	n	#N/A	#N/A	#N/A	#N/A	#N/A	#N/A	#N/A	#N/A	0	1		#N/A	0	0
0	0	0	0	#N/A	0	n	#N/A	#N/A	#N/A	#N/A	#N/A	#N/A	#N/A	#N/A	0	1		#N/A	0	0
0	0	0	0	#N/A	0	n	#N/A	#N/A	#N/A	#N/A	#N/A	#N/A	#N/A	#N/A	0	1		#N/A	0	0
0	0	0	0	#N/A	0	n	#N/A	#N/A	#N/A	#N/A	#N/A	#N/A	#N/A	#N/A	0	1		#N/A	0	0
0	0	0	0	#N/A	0	n	#N/A	#N/A	#N/A	#N/A	#N/A	#N/A	#N/A	#N/A	0	1		#N/A	0	0
0	0	0	0	#N/A	0	n	#N/A	#N/A	#N/A	#N/A	#N/A	#N/A	#N/A	#N/A	0	1		#N/A	0	0
0	0	0	0	#N/A	0	n	#N/A	#N/A	#N/A	#N/A	#N/A	#N/A	#N/A	#N/A	0	1		#N/A	0	0
0	0	0	0	#N/A	0	n	#N/A	#N/A	#N/A	#N/A	#N/A	#N/A	#N/A	#N/A	0	1		#N/A	0	0
0	0	0	0	#N/A	0	n	#N/A	#N/A	#N/A	#N/A	#N/A	#N/A	#N/A	#N/A	0	1		#N/A	0	0
0	0	0	0	#N/A	0	n	#N/A	#N/A	#N/A	#N/A	#N/A	#N/A	#N/A	#N/A	0	1		#N/A	0	0
0	0	0	0	#N/A	0	n	#N/A	#N/A	#N/A	#N/A	#N/A	#N/A	#N/A	#N/A	0	1		#N/A	0	0
0	0	0	0	#N/A	0	n	#N/A	#N/A	#N/A	#N/A	#N/A	#N/A	#N/A	#N/A	0	1		#N/A	0	0
0	0	0	0	#N/A	0	n	#N/A	#N/A	#N/A	#N/A	#N/A	#N/A	#N/A	#N/A	0	1		#N/A	0	0
0	0	0	0	#N/A	0	n	#N/A	#N/A	#N/A	#N/A	#N/A	#N/A	#N/A	#N/A	0	1		#N/A	0	0
0	0	0	0	#N/A	0	n	#N/A	#N/A	#N/A	#N/A	#N/A	#N/A	#N/A	#N/A	0	1		#N/A	0	0
0	0	0	0	#N/A	0	n	#N/A	#N/A	#N/A	#N/A	#N/A	#N/A	#N/A	#N/A	0	1		#N/A	0	0
0	0	0	0	#N/A	0	n	#N/A	#N/A	#N/A	#N/A	#N/A	#N/A	#N/A	#N/A	0	1		#N/A	0	0
0	0	0	0	#N/A	0	n	#N/A	#N/A	#N/A	#N/A	#N/A	#N/A	#N/A	#N/A	0	1		#N/A	0	0
0	0	0	0	#N/A	0	n	#N/A	#N/A	#N/A	#N/A	#N/A	#N/A	#N/A	#N/A	0	1		#N/A	0	0
0	0	0	0	#N/A	0	n	#N/A	#N/A	#N/A	#N/A	#N/A	#N/A	#N/A	#N/A	0	1		#N/A	0	0

## Sheet: Production-Scores
								exposure duration				Score	frequency Score			Handling Score			imission reduction Score			personal protection (PPE)				inspection		cleaning		background	local controls			Room size		index	Ventilation		index	general ventilation
Step	Name	In/Out	Substance	mass (kg)	temperature (°C)	Mix?	default?	min/h	default?	value	default?	th	entry?	default?	fh	entry	default	H	entry?	default?	Score	entry?	default?	Score	(eta)imm	entry?	default?	entry?	default?	a	entry?	default?	(eta)lc	entry?	default?	row	entry?	default?	column	(eta)gv
1	upstream: ethanol	input	naphta	201	0	0	n	0	min	0	5	0.0104167	0	4-5 days a week	1	0	closed containers	0	0	no cabin	1	0	None	1	1	0	regular inspections	0	No daily cleaning	0.01	0	no control measures	1	0	>1000 m3	3	0	Mechanical/ natural ventilation	2	1.1
1	0	process	hydrogen	4	830	y	y	min	min	0.007	0.007	1.45833e-05	0	4-5 days a week	1	0	closed containers	0	0	no cabin	1	0	None	1	1	0	regular inspections	0	No daily cleaning	0.01	0	no control measures	1	0	>1000 m3	3	0	Mechanical/ natural ventilation	2	1.1
1	0	process	methane	30.9	830	y	y	min	min	0.007	0.007	1.45833e-05	0	4-5 days a week	1	0	closed containers	0	0	no cabin	1	0	None	1	1	0	regular inspections	0	No daily cleaning	0.01	0	no control measures	1	0	>1000 m3	3	0	Mechanical/ natural ventilation	2	1.1
1	0	process	acetylene	0.8	830	y	y	min	min	0.007	0.007	1.45833e-05	0	4-5 days a week	1	0	closed containers	0	0	no cabin	1	0	None	1	1	0	regular inspections	0	No daily cleaning	0.01	0	no control measures	1	0	>1000 m3	3	0	Mechanical/ natural ventilation	2	1.1
1	0	process	propylene	32.4	830	y	y	min	min	0.007	0.007	1.45833e-05	0	4-5 days a week	1	0	closed containers	0	0	no cabin	1	0	None	1	1	0	regular inspections	0	No daily cleaning	0.01	0	no control measures	1	0	>1000 m3	3	0	Mechanical/ natural ventilation	2	1.1
1	0	process	propane	2.4	830	y	y	min	min	0.007	0.007	1.45833e-05	0	4-5 days a week	1	0	closed containers	0	0	no cabin	1	0	None	1	1	0	regular inspections	0	No daily cleaning	0.01	0	no control measures	1	0	>1000 m3	3	0	Mechanical/ natural ventilation	2	1.1
1	0	process	1,3-butadiene	8.6	830	y	y	min	min	0.007	0.007	1.45833e-05	0	4-5 days a week	1	0	closed containers	0	0	no cabin	1	0	None	1	1	0	regular inspections	0	No daily cleaning	0.01	0	no control measures	1	0	>1000 m3	3	0	Mechanical/ natural ventilation	2	1.1
1	0	process	butene	11.1	830	y	y	min	min	0.007	0.007	1.45833e-05	0	4-5 days a week	1	0	closed containers	0	0	no cabin	1	0	None	1	1	0	regular inspections	0	No daily cleaning	0.01	0	no control measures	1	0	>1000 m3	3	0	Mechanical/ natural ventilation	2	1.1
1	0	process	ethylene	57.7	830	y	y	min	min	0.007	0.007	1.45833e-05	0	4-5 days a week	1	0	closed containers	0	0	no cabin	1	0	None	1	1	0	regular inspections	0	No daily cleaning	0.01	0	no control measures	1	0	>1000 m3	3	0	Mechanical/ natural ventilation	2	1.1
1	0	output	hydrogen	4	170	y	y	0	min	0	5	0.0104167	0	4-5 days a week	1	0	closed containers	0	0	no cabin	1	0	None	1	1	0	regular inspections	0	No daily cleaning	0.01	0	no control measures	1	0	>1000 m3	3	0	Mechanical/ natural ventilation	2	1.1
1	0	output	methane	30.9	170	y	y	0	min	0	5	0.0104167	0	4-5 days a week	1	0	closed containers	0	0	no cabin	1	0	None	1	1	0	regular inspections	0	No daily cleaning	0.01	0	no control measures	1	0	>1000 m3	3	0	Mechanical/ natural ventilation	2	1.1
1	0	output	acetylene	0.8	170	y	y	0	min	0	5	0.0104167	0	4-5 days a week	1	0	closed containers	0	0	no cabin	1	0	None	1	1	0	regular inspections	0	No daily cleaning	0.01	0	no control measures	1	0	>1000 m3	3	0	Mechanical/ natural ventilation	2	1.1
1	0	output	propylene	32.4	170	y	y	0	min	0	5	0.0104167	0	4-5 days a week	1	0	closed containers	0	0	no cabin	1	0	None	1	1	0	regular inspections	0	No daily cleaning	0.01	0	no control measures	1	0	>1000 m3	3	0	Mechanical/ natural ventilation	2	1.1
1	0	output	propane	2.4	170	y	y	0	min	0	5	0.0104167	0	4-5 days a week	1	0	closed containers	0	0	no cabin	1	0	None	1	1	0	regular inspections	0	No daily cleaning	0.01	0	no control measures	1	0	>1000 m3	3	0	Mechanical/ natural ventilation	2	1.1
1	0	output	1,3-butadiene	8.6	170	y	y	0	min	0	5	0.0104167	0	4-5 days a week	1	0	closed containers	0	0	no cabin	1	0	None	1	1	0	regular inspections	0	No daily cleaning	0.01	0	no control measures	1	0	>1000 m3	3	0	Mechanical/ natural ventilation	2	1.1
1	0	output	butene	11.1	170	y	y	0	min	0	5	0.0104167	0	4-5 days a week	1	0	closed containers	0	0	no cabin	1	0	None	1	1	0	regular inspections	0	No daily cleaning	0.01	0	no control measures	1	0	>1000 m3	3	0	Mechanical/ natural ventilation	2	1.1
1	0	output	ethylene	57.7	170	n	n	0	min	0	5	0.0104167	0	4-5 days a week	1	0	closed containers	0	0	no cabin	1	0	None	1	1	0	regular inspections	0	No daily cleaning	0.01	0	no control measures	1	0	>1000 m3	3	0	Mechanical/ natural ventilation	2	1.1
2	drying	input	olive leaves	400	0	0	n	0	min	0	5	0.0104167	0	4-5 days a week	1	0	closed containers	0	0	no cabin	1	0	None	1	1	0	regular inspections	0	No daily cleaning	0.01	0	no control measures	1	0	>1000 m3	3	0	Mechanical/ natural ventilation	2	1.1
2	0	process	olive leaves	200	50	0	y	h	h	4	4	0.5	0	4-5 days a week	1	0	closed containers	0	0	no cabin	1	0	None	1	1	0	regular inspections	0	No daily cleaning	0.01	0	no control measures	1	0	>1000 m3	3	0	Mechanical/ natural ventilation	2	1.1
2	0	output	olive leaves, dried	200	0	n	n	0	min	0	5	0.0104167	0	4-5 days a week	1	0	closed containers	0	0	no cabin	1	0	None	1	1	0	regular inspections	0	No daily cleaning	0.01	0	no control measures	1	0	>1000 m3	3	0	Mechanical/ natural ventilation	2	1.1
2	0	output	water	200	0	n	n	0	min	0	5	0.0104167	0	4-5 days a week	1	0	closed containers	0	0	no cabin	1	0	None	1	1	0	regular inspections	0	No daily cleaning	0.01	0	no control measures	1	0	>1000 m3	3	0	Mechanical/ natural ventilation	2	1.1
3	milling	input	olive leaves, dried	200	0	0	n	0	min	0	5	0.0104167	0	4-5 days a week	1	0	closed containers	0	0	no cabin	1	0	None	1	1	0	regular inspections	0	No daily cleaning	0.01	0	no control measures	1	0	>1000 m3	3	0	Mechanical/ natural ventilation	2	1.1
3	0	process	olive leaves, dried, ground	200	0	0	y	0	min	0	30	0.0625	0	4-5 days a week	1	0	closed containers	0	0	no cabin	1	0	None	1	1	0	regular inspections	0	No daily cleaning	0.01	0	no control measures	1	0	>1000 m3	3	0	Mechanical/ natural ventilation	2	1.1
3	0	output	olive leaves, dried, ground	200	0	0	n	0	min	0	5	0.0104167	0	4-5 days a week	1	0	closed containers	0	0	no cabin	1	0	None	1	1	0	regular inspections	0	No daily cleaning	0.01	0	no control measures	1	0	>1000 m3	3	0	Mechanical/ natural ventilation	2	1.1
4	extraction	input	olive leaves, dried, ground	200	0	0	n	0	min	0	5	0.0104167	0	4-5 days a week	1	0	closed containers	0	0	no cabin	1	0	None	1	1	0	regular inspections	0	No daily cleaning	0.01	0	no control measures	1	0	>1000 m3	3	0	Mechanical/ natural ventilation	2	1.1
4	0	input	water	1800	0	0	n	0	min	0	5	0.0104167	0	4-5 days a week	1	0	closed containers	0	0	no cabin	1	0	None	1	1	0	regular inspections	0	No daily cleaning	0.01	0	no control measures	1	0	>1000 m3	3	0	Mechanical/ natural ventilation	2	1.1
4	0	process	olive leaves, dried, ground	200	90	y	y	h	h	1	1	0.125	0	4-5 days a week	1	0	closed containers	0	0	no cabin	1	0	None	1	1	0	regular inspections	0	No daily cleaning	0.01	0	no control measures	1	0	>1000 m3	3	0	Mechanical/ natural ventilation	2	1.1
4	0	process	water	1800	90	y	y	h	h	1	1	0.125	0	4-5 days a week	1	0	closed containers	0	0	no cabin	1	0	None	1	1	0	regular inspections	0	No daily cleaning	0.01	0	no control measures	1	0	>1000 m3	3	0	Mechanical/ natural ventilation	2	1.1
4	0	output	olive leaves, dried, ground	200	0	y	y	0	min	0	5	0.0104167	0	4-5 days a week	1	0	closed containers	0	0	no cabin	1	0	None	1	1	0	regular inspections	0	No daily cleaning	0.01	0	no control measures	1	0	>1000 m3	3	0	Mechanical/ natural ventilation	2	1.1
4	0	output	water	1800	0	y	y	0	min	0	5	0.0104167	0	4-5 days a week	1	0	closed containers	0	0	no cabin	1	0	None	1	1	0	regular inspections	0	No daily cleaning	0.01	0	no control measures	1	0	>1000 m3	3	0	Mechanical/ natural ventilation	2	1.1
5	filtration	input	olive leaves, dried, ground	200	0	y	y	0	min	0	5	0.0104167	0	4-5 days a week	1	0	closed containers	0	0	no cabin	1	0	None	1	1	0	regular inspections	0	No daily cleaning	0.01	0	no control measures	1	0	>1000 m3	3	0	Mechanical/ natural ventilation	2	1.1
5	0	input	water	1800	0	y	y	0	min	0	5	0.0104167	0	4-5 days a week	1	0	closed containers	0	0	no cabin	1	0	None	1	1	0	regular inspections	0	No daily cleaning	0.01	0	no control measures	1	0	>1000 m3	3	0	Mechanical/ natural ventilation	2	1.1
5	0	process	olive leaves, dried, ground	200	0	0	y	0	min	0	30	0.0625	0	4-5 days a week	1	0	closed containers	0	0	no cabin	1	0	None	1	1	0	regular inspections	0	No daily cleaning	0.01	0	no control measures	1	0	>1000 m3	3	0	Mechanical/ natural ventilation	2	1.1
5	0	process	water	1800	0	0	y	0	min	0	30	0.0625	0	4-5 days a week	1	0	closed containers	0	0	no cabin	1	0	None	1	1	0	regular inspections	0	No daily cleaning	0.01	0	no control measures	1	0	>1000 m3	3	0	Mechanical/ natural ventilation	2	1.1
5	0	output	extract P0	1550	0	0	n	0	min	0	5	0.0104167	0	4-5 days a week	1	0	closed containers	0	0	no cabin	1	0	None	1	1	0	regular inspections	0	No daily cleaning	0.01	0	no control measures	1	0	>1000 m3	3	0	Mechanical/ natural ventilation	2	1.1
5	0	output	olive leaves, dried, ground	200	0	y	y	0	min	0	5	0.0104167	0	4-5 days a week	1	0	closed containers	0	0	no cabin	1	0	None	1	1	0	regular inspections	0	No daily cleaning	0.01	0	no control measures	1	0	>1000 m3	3	0	Mechanical/ natural ventilation	2	1.1
5	0	output	water	250	0	y	y	0	min	0	5	0.0104167	0	4-5 days a week	1	0	closed containers	0	0	no cabin	1	0	None	1	1	0	regular inspections	0	No daily cleaning	0.01	0	no control measures	1	0	>1000 m3	3	0	Mechanical/ natural ventilation	2	1.1
6	concentrating	input	extract P0	1550	0	0	n	0	min	0	5	0.0104167	0	4-5 days a week	1	0	closed containers	0	0	no cabin	1	0	None	1	1	0	regular inspections	0	No daily cleaning	0.01	0	no control measures	1	0	>1000 m3	3	0	Mechanical/ natural ventilation	2	1.1
6	0	process	extract P0, concentrated	100	50	y	y	0	min	0	30	0.0625	0	4-5 days a week	1	0	closed containers	0	0	no cabin	1	0	None	1	1	0	regular inspections	0	No daily cleaning	0.01	0	no control measures	1	0	>1000 m3	3	0	Mechanical/ natural ventilation	2	1.1
6	0	process	water	1450	50	y	y	0	min	0	30	0.0625	0	4-5 days a week	1	0	closed containers	0	0	no cabin	1	0	None	1	1	0	regular inspections	0	No daily cleaning	0.01	0	no control measures	1	0	>1000 m3	3	0	Mechanical/ natural ventilation	2	1.1
6	0	output	extract P0, concentrated	100	0	n	n	0	min	0	5	0.0104167	0	4-5 days a week	1	0	closed containers	0	0	no cabin	1	0	None	1	1	0	regular inspections	0	No daily cleaning	0.01	0	no control measures	1	0	>1000 m3	3	0	Mechanical/ natural ventilation	2	1.1
6	0	output	water	1450	0	n	n	0	min	0	5	0.0104167	0	4-5 days a week	1	0	closed containers	0	0	no cabin	1	0	None	1	1	0	regular inspections	0	No daily cleaning	0.01	0	no control measures	1	0	>1000 m3	3	0	Mechanical/ natural ventilation	2	1.1
7	biotransformation	input	extract P0, concentrated	100	0	n	n	0	min	0	5	0.0104167	0	4-5 days a week	1	0	closed containers	0	0	no cabin	1	0	None	1	1	0	regular inspections	0	No daily cleaning	0.01	0	no control measures	1	0	>1000 m3	3	0	Mechanical/ natural ventilation	2	1.1
7	0	input	enzyme	0.2	0	n	n	0	min	0	5	0.0104167	0	4-5 days a week	1	0	closed containers	0	0	no cabin	1	0	None	1	1	0	regular inspections	0	No daily cleaning	0.01	0	no control measures	1	0	>1000 m3	3	0	Mechanical/ natural ventilation	2	1.1
7	0	process	extract P0, concentrated	100	37	y	y	h	h	24	24	3	0	4-5 days a week	1	0	closed containers	0	0	no cabin	1	0	None	1	1	0	regular inspections	0	No daily cleaning	0.01	0	no control measures	1	0	>1000 m3	3	0	Mechanical/ natural ventilation	2	1.1
7	0	process	enzyme	0.2	37	y	y	h	h	24	24	3	0	4-5 days a week	1	0	closed containers	0	0	no cabin	1	0	None	1	1	0	regular inspections	0	No daily cleaning	0.01	0	no control measures	1	0	>1000 m3	3	0	Mechanical/ natural ventilation	2	1.1
7	0	output	extract P0, concentrated	100	0	y	y	0	min	0	5	0.0104167	0	4-5 days a week	1	0	closed containers	0	0	no cabin	1	0	None	1	1	0	regular inspections	0	No daily cleaning	0.01	0	no control measures	1	0	>1000 m3	3	0	Mechanical/ natural ventilation	2	1.1
7	0	output	enzyme	0.2	0	y	y	0	min	0	5	0.0104167	0	4-5 days a week	1	0	closed containers	0	0	no cabin	1	0	None	1	1	0	regular inspections	0	No daily cleaning	0.01	0	no control measures	1	0	>1000 m3	3	0	Mechanical/ natural ventilation	2	1.1
8	denaturating	input	extract P0, concentrated	100	0	y	y	0	min	0	5	0.0104167	0	4-5 days a week	1	0	closed containers	0	0	no cabin	1	0	None	1	1	0	regular inspections	0	No daily cleaning	0.01	0	no control measures	1	0	>1000 m3	3	0	Mechanical/ natural ventilation	2	1.1
8	0	input	enzyme	0.2	0	y	y	0	min	0	5	0.0104167	0	4-5 days a week	1	0	closed containers	0	0	no cabin	1	0	None	1	1	0	regular inspections	0	No daily cleaning	0.01	0	no control measures	1	0	>1000 m3	3	0	Mechanical/ natural ventilation	2	1.1
8	0	process	extract P0, concentrated	100	0	y	y	0	min	0	30	0.0625	0	4-5 days a week	1	0	closed containers	0	0	no cabin	1	0	None	1	1	0	regular inspections	0	No daily cleaning	0.01	0	no control measures	1	0	>1000 m3	3	0	Mechanical/ natural ventilation	2	1.1
8	0	process	enzyme	0.2	0	y	y	0	min	0	30	0.0625	0	4-5 days a week	1	0	closed containers	0	0	no cabin	1	0	None	1	1	0	regular inspections	0	No daily cleaning	0.01	0	no control measures	1	0	>1000 m3	3	0	Mechanical/ natural ventilation	2	1.1
8	0	output	extract P0, concentrated	100	0	0	n	0	min	0	5	0.0104167	0	4-5 days a week	1	0	closed containers	0	0	no cabin	1	0	None	1	1	0	regular inspections	0	No daily cleaning	0.01	0	no control measures	1	0	>1000 m3	3	0	Mechanical/ natural ventilation	2	1.1
9	adsorption	input	extract P0, concentrated	100	0	n	n	0	min	0	5	0.0104167	0	4-5 days a week	1	0	closed containers	0	0	no cabin	1	0	None	1	1	0	regular inspections	0	No daily cleaning	0.01	0	no control measures	1	0	>1000 m3	3	0	Mechanical/ natural ventilation	2	1.1
9	0	input	adsorber	30	0	n	n	0	min	0	5	0.0104167	0	4-5 days a week	1	0	closed containers	0	0	no cabin	1	0	None	1	1	0	regular inspections	0	No daily cleaning	0.01	0	no control measures	1	0	>1000 m3	3	0	Mechanical/ natural ventilation	2	1.1
9	0	process	extract P0, concentrated	100	0	y	y	h	h	2	2	0.25	0	4-5 days a week	1	0	closed containers	0	0	no cabin	1	0	None	1	1	0	regular inspections	0	No daily cleaning	0.01	0	no control measures	1	0	>1000 m3	3	0	Mechanical/ natural ventilation	2	1.1
9	0	process	adsorber	30	0	y	y	h	h	2	2	0.25	0	4-5 days a week	1	0	closed containers	0	0	no cabin	1	0	None	1	1	0	regular inspections	0	No daily cleaning	0.01	0	no control measures	1	0	>1000 m3	3	0	Mechanical/ natural ventilation	2	1.1
9	0	output	extract P0, concentrated	100	0	y	y	0	min	0	5	0.0104167	0	4-5 days a week	1	0	closed containers	0	0	no cabin	1	0	None	1	1	0	regular inspections	0	No daily cleaning	0.01	0	no control measures	1	0	>1000 m3	3	0	Mechanical/ natural ventilation	2	1.1
9	0	output	adsorber	30	0	n	n	0	min	0	5	0.0104167	0	4-5 days a week	1	0	closed containers	0	0	no cabin	1	0	None	1	1	0	regular inspections	0	No daily cleaning	0.01	0	no control measures	1	0	>1000 m3	3	0	Mechanical/ natural ventilation	2	1.1
10	elution	input	extract P0, concentrated	100	0	n	n	0	min	0	5	0.0104167	0	4-5 days a week	1	0	closed containers	0	0	no cabin	1	0	None	1	1	0	regular inspections	0	No daily cleaning	0.01	0	no control measures	1	0	>1000 m3	3	0	Mechanical/ natural ventilation	2	1.1
10	0	input	adsorber	30	0	n	n	0	min	0	5	0.0104167	0	4-5 days a week	1	0	closed containers	0	0	no cabin	1	0	None	1	1	0	regular inspections	0	No daily cleaning	0.01	0	no control measures	1	0	>1000 m3	3	0	Mechanical/ natural ventilation	2	1.1
10	0	input	ethanol	94.8	0	n	n	0	min	0	5	0.0104167	0	4-5 days a week	1	0	closed containers	0	0	no cabin	1	0	None	1	1	0	regular inspections	0	No daily cleaning	0.01	0	no control measures	1	0	>1000 m3	3	0	Mechanical/ natural ventilation	2	1.1
10	0	process	adsorber	30	0	y	y	0	min	0	30	0.0625	0	4-5 days a week	1	0	closed containers	0	0	no cabin	1	0	None	1	1	0	regular inspections	0	No daily cleaning	0.01	0	no control measures	1	0	>1000 m3	3	0	Mechanical/ natural ventilation	2	1.1
10	0	process	ethanol	94.8	0	y	y	0	min	0	30	0.0625	0	4-5 days a week	1	0	closed containers	0	0	no cabin	1	0	None	1	1	0	regular inspections	0	No daily cleaning	0.01	0	no control measures	1	0	>1000 m3	3	0	Mechanical/ natural ventilation	2	1.1
10	0	output	adsorber	30	0	0	n	0	min	0	5	0.0104167	0	4-5 days a week	1	0	closed containers	0	0	no cabin	1	0	None	1	1	0	regular inspections	0	No daily cleaning	0.01	0	no control measures	1	0	>1000 m3	3	0	Mechanical/ natural ventilation	2	1.1
10	0	output	ethanol	94.8	0	0	n	0	min	0	5	0.0104167	0	4-5 days a week	1	0	closed containers	0	0	no cabin	1	0	None	1	1	0	regular inspections	0	No daily cleaning	0.01	0	no control measures	1	0	>1000 m3	3	0	Mechanical/ natural ventilation	2	1.1
11	vaporization	input	ethanol	94.8	0	0	n	0	min	0	5	0.0104167	0	4-5 days a week	1	0	closed containers	0	0	no cabin	1	0	None	1	1	0	regular inspections	0	No daily cleaning	0.01	0	no control measures	1	0	>1000 m3	3	0	Mechanical/ natural ventilation	2	1.1
11	0	process	ethanol	94.8	50	0	y	0	min	0	30	0.0625	0	4-5 days a week	1	0	closed containers	0	0	no cabin	1	0	None	1	1	0	regular inspections	0	No daily cleaning	0.01	0	no control measures	1	0	>1000 m3	3	0	Mechanical/ natural ventilation	2	1.1
11	0	output	ethanol	94.8	50	0	n	0	min	0	5	0.0104167	0	4-5 days a week	1	0	closed containers	0	0	no cabin	1	0	None	1	1	0	regular inspections	0	No daily cleaning	0.01	0	no control measures	1	0	>1000 m3	3	0	Mechanical/ natural ventilation	2	1.1
11	0	output	op-agly	2.7	0	0	n	0	min	0	5	0.0104167	0	4-5 days a week	1	0	closed containers	0	0	no cabin	1	0	None	1	1	0	regular inspections	0	No daily cleaning	0.01	0	no control measures	1	0	>1000 m3	3	0	Mechanical/ natural ventilation	2	1.1
0	0	0	0	0	0	0	n	0	min	0	0	0	0	4-5 days a week	1	0	closed containers	0	0	no cabin	1	0	None	1	1	0	regular inspections	0	No daily cleaning	0.01	0	no control measures	1	0	>1000 m3	3	0	Mechanical/ natural ventilation	2	1.1
0	0	0	0	0	0	0	n	0	min	0	0	0	0	4-5 days a week	1	0	closed containers	0	0	no cabin	1	0	None	1	1	0	regular inspections	0	No daily cleaning	0.01	0	no control measures	1	0	>1000 m3	3	0	Mechanical/ natural ventilation	2	1.1
0	0	0	0	0	0	0	n	0	min	0	0	0	0	4-5 days a week	1	0	closed containers	0	0	no cabin	1	0	None	1	1	0	regular inspections	0	No daily cleaning	0.01	0	no control measures	1	0	>1000 m3	3	0	Mechanical/ natural ventilation	2	1.1
0	0	0	0	0	0	0	n	0	min	0	0	0	0	4-5 days a week	1	0	closed containers	0	0	no cabin	1	0	None	1	1	0	regular inspections	0	No daily cleaning	0.01	0	no control measures	1	0	>1000 m3	3	0	Mechanical/ natural ventilation	2	1.1
0	0	0	0	0	0	0	n	0	min	0	0	0	0	4-5 days a week	1	0	closed containers	0	0	no cabin	1	0	None	1	1	0	regular inspections	0	No daily cleaning	0.01	0	no control measures	1	0	>1000 m3	3	0	Mechanical/ natural ventilation	2	1.1
0	0	0	0	0	0	0	n	0	min	0	0	0	0	4-5 days a week	1	0	closed containers	0	0	no cabin	1	0	None	1	1	0	regular inspections	0	No daily cleaning	0.01	0	no control measures	1	0	>1000 m3	3	0	Mechanical/ natural ventilation	2	1.1
0	0	0	0	0	0	0	n	0	min	0	0	0	0	4-5 days a week	1	0	closed containers	0	0	no cabin	1	0	None	1	1	0	regular inspections	0	No daily cleaning	0.01	0	no control measures	1	0	>1000 m3	3	0	Mechanical/ natural ventilation	2	1.1
0	0	0	0	0	0	0	n	0	min	0	0	0	0	4-5 days a week	1	0	closed containers	0	0	no cabin	1	0	None	1	1	0	regular inspections	0	No daily cleaning	0.01	0	no control measures	1	0	>1000 m3	3	0	Mechanical/ natural ventilation	2	1.1
0	0	0	0	0	0	0	n	0	min	0	0	0	0	4-5 days a week	1	0	closed containers	0	0	no cabin	1	0	None	1	1	0	regular inspections	0	No daily cleaning	0.01	0	no control measures	1	0	>1000 m3	3	0	Mechanical/ natural ventilation	2	1.1
0	0	0	0	0	0	0	n	0	min	0	0	0	0	4-5 days a week	1	0	closed containers	0	0	no cabin	1	0	None	1	1	0	regular inspections	0	No daily cleaning	0.01	0	no control measures	1	0	>1000 m3	3	0	Mechanical/ natural ventilation	2	1.1
0	0	0	0	0	0	0	n	0	min	0	0	0	0	4-5 days a week	1	0	closed containers	0	0	no cabin	1	0	None	1	1	0	regular inspections	0	No daily cleaning	0.01	0	no control measures	1	0	>1000 m3	3	0	Mechanical/ natural ventilation	2	1.1
0	0	0	0	0	0	0	n	0	min	0	0	0	0	4-5 days a week	1	0	closed containers	0	0	no cabin	1	0	None	1	1	0	regular inspections	0	No daily cleaning	0.01	0	no control measures	1	0	>1000 m3	3	0	Mechanical/ natural ventilation	2	1.1
0	0	0	0	0	0	0	n	0	min	0	0	0	0	4-5 days a week	1	0	closed containers	0	0	no cabin	1	0	None	1	1	0	regular inspections	0	No daily cleaning	0.01	0	no control measures	1	0	>1000 m3	3	0	Mechanical/ natural ventilation	2	1.1
0	0	0	0	0	0	0	n	0	min	0	0	0	0	4-5 days a week	1	0	closed containers	0	0	no cabin	1	0	None	1	1	0	regular inspections	0	No daily cleaning	0.01	0	no control measures	1	0	>1000 m3	3	0	Mechanical/ natural ventilation	2	1.1
0	0	0	0	0	0	0	n	0	min	0	0	0	0	4-5 days a week	1	0	closed containers	0	0	no cabin	1	0	None	1	1	0	regular inspections	0	No daily cleaning	0.01	0	no control measures	1	0	>1000 m3	3	0	Mechanical/ natural ventilation	2	1.1
0	0	0	0	0	0	0	n	0	min	0	0	0	0	4-5 days a week	1	0	closed containers	0	0	no cabin	1	0	None	1	1	0	regular inspections	0	No daily cleaning	0.01	0	no control measures	1	0	>1000 m3	3	0	Mechanical/ natural ventilation	2	1.1
0	0	0	0	0	0	0	n	0	min	0	0	0	0	4-5 days a week	1	0	closed containers	0	0	no cabin	1	0	None	1	1	0	regular inspections	0	No daily cleaning	0.01	0	no control measures	1	0	>1000 m3	3	0	Mechanical/ natural ventilation	2	1.1
0	0	0	0	0	0	0	n	0	min	0	0	0	0	4-5 days a week	1	0	closed containers	0	0	no cabin	1	0	None	1	1	0	regular inspections	0	No daily cleaning	0.01	0	no control measures	1	0	>1000 m3	3	0	Mechanical/ natural ventilation	2	1.1
0	0	0	0	0	0	0	n	0	min	0	0	0	0	4-5 days a week	1	0	closed containers	0	0	no cabin	1	0	None	1	1	0	regular inspections	0	No daily cleaning	0.01	0	no control measures	1	0	>1000 m3	3	0	Mechanical/ natural ventilation	2	1.1
0	0	0	0	0	0	0	n	0	min	0	0	0	0	4-5 days a week	1	0	closed containers	0	0	no cabin	1	0	None	1	1	0	regular inspections	0	No daily cleaning	0.01	0	no control measures	1	0	>1000 m3	3	0	Mechanical/ natural ventilation	2	1.1
0	0	0	0	0	0	0	n	0	min	0	0	0	0	4-5 days a week	1	0	closed containers	0	0	no cabin	1	0	None	1	1	0	regular inspections	0	No daily cleaning	0.01	0	no control measures	1	0	>1000 m3	3	0	Mechanical/ natural ventilation	2	1.1
0	0	0	0	0	0	0	n	0	min	0	0	0	0	4-5 days a week	1	0	closed containers	0	0	no cabin	1	0	None	1	1	0	regular inspections	0	No daily cleaning	0.01	0	no control measures	1	0	>1000 m3	3	0	Mechanical/ natural ventilation	2	1.1
0	0	0	0	0	0	0	n	0	min	0	0	0	0	4-5 days a week	1	0	closed containers	0	0	no cabin	1	0	None	1	1	0	regular inspections	0	No daily cleaning	0.01	0	no control measures	1	0	>1000 m3	3	0	Mechanical/ natural ventilation	2	1.1
0	0	0	0	0	0	0	n	0	min	0	0	0	0	4-5 days a week	1	0	closed containers	0	0	no cabin	1	0	None	1	1	0	regular inspections	0	No daily cleaning	0.01	0	no control measures	1	0	>1000 m3	3	0	Mechanical/ natural ventilation	2	1.1
0	0	0	0	0	0	0	n	0	min	0	0	0	0	4-5 days a week	1	0	closed containers	0	0	no cabin	1	0	None	1	1	0	regular inspections	0	No daily cleaning	0.01	0	no control measures	1	0	>1000 m3	3	0	Mechanical/ natural ventilation	2	1.1
0	0	0	0	#REF!	0	0	n	0	min	0	0	0	0	4-5 days a week	1	0	closed containers	0	0	no cabin	1	0	None	1	1	0	regular inspections	0	No daily cleaning	0.01	0	no control measures	1	0	>1000 m3	3	0	Mechanical/ natural ventilation	2	1.1
0	0	0	0	0	0	0	n	0	min	0	0	0	0	4-5 days a week	1	0	closed containers	0	0	no cabin	1	0	None	1	1	0	regular inspections	0	No daily cleaning	0.01	0	no control measures	1	0	>1000 m3	3	0	Mechanical/ natural ventilation	2	1.1
0	0	0	0	0	0	0	n	0	min	0	0	0	0	4-5 days a week	1	0	closed containers	0	0	no cabin	1	0	None	1	1	0	regular inspections	0	No daily cleaning	0.01	0	no control measures	1	0	>1000 m3	3	0	Mechanical/ natural ventilation	2	1.1
0	0	0	0	0	0	0	n	0	min	0	0	0	0	4-5 days a week	1	0	closed containers	0	0	no cabin	1	0	None	1	1	0	regular inspections	0	No daily cleaning	0.01	0	no control measures	1	0	>1000 m3	3	0	Mechanical/ natural ventilation	2	1.1
0	0	0	0	0	0	0	n	0	min	0	0	0	0	4-5 days a week	1	0	closed containers	0	0	no cabin	1	0	None	1	1	0	regular inspections	0	No daily cleaning	0.01	0	no control measures	1	0	>1000 m3	3	0	Mechanical/ natural ventilation	2	1.1
0	0	0	0	0	0	0	n	0	min	0	0	0	0	4-5 days a week	1	0	closed containers	0	0	no cabin	1	0	None	1	1	0	regular inspections	0	No daily cleaning	0.01	0	no control measures	1	0	>1000 m3	3	0	Mechanical/ natural ventilation	2	1.1
0	0	0	0	0	0	0	n	0	min	0	0	0	0	4-5 days a week	1	0	closed containers	0	0	no cabin	1	0	None	1	1	0	regular inspections	0	No daily cleaning	0.01	0	no control measures	1	0	>1000 m3	3	0	Mechanical/ natural ventilation	2	1.1
0	0	0	0	0	0	0	n	0	min	0	0	0	0	4-5 days a week	1	0	closed containers	0	0	no cabin	1	0	None	1	1	0	regular inspections	0	No daily cleaning	0.01	0	no control measures	1	0	>1000 m3	3	0	Mechanical/ natural ventilation	2	1.1
0	0	0	0	0	0	0	n	0	min	0	0	0	0	4-5 days a week	1	0	closed containers	0	0	no cabin	1	0	None	1	1	0	regular inspections	0	No daily cleaning	0.01	0	no control measures	1	0	>1000 m3	3	0	Mechanical/ natural ventilation	2	1.1
0	0	0	0	0	0	0	n	0	min	0	0	0	0	4-5 days a week	1	0	closed containers	0	0	no cabin	1	0	None	1	1	0	regular inspections	0	No daily cleaning	0.01	0	no control measures	1	0	>1000 m3	3	0	Mechanical/ natural ventilation	2	1.1
0	0	0	0	0	0	0	n	0	min	0	0	0	0	4-5 days a week	1	0	closed containers	0	0	no cabin	1	0	None	1	1	0	regular inspections	0	No daily cleaning	0.01	0	no control measures	1	0	>1000 m3	3	0	Mechanical/ natural ventilation	2	1.1
0	0	0	0	0	0	0	n	0	min	0	0	0	0	4-5 days a week	1	0	closed containers	0	0	no cabin	1	0	None	1	1	0	regular inspections	0	No daily cleaning	0.01	0	no control measures	1	0	>1000 m3	3	0	Mechanical/ natural ventilation	2	1.1
0	0	0	0	0	0	0	n	0	min	0	0	0	0	4-5 days a week	1	0	closed containers	0	0	no cabin	1	0	None	1	1	0	regular inspections	0	No daily cleaning	0.01	0	no control measures	1	0	>1000 m3	3	0	Mechanical/ natural ventilation	2	1.1
0	0	0	0	0	0	0	n	0	min	0	0	0	0	4-5 days a week	1	0	closed containers	0	0	no cabin	1	0	None	1	1	0	regular inspections	0	No daily cleaning	0.01	0	no control measures	1	0	>1000 m3	3	0	Mechanical/ natural ventilation	2	1.1
0	0	0	0	0	0	0	n	0	min	0	0	0	0	4-5 days a week	1	0	closed containers	0	0	no cabin	1	0	None	1	1	0	regular inspections	0	No daily cleaning	0.01	0	no control measures	1	0	>1000 m3	3	0	Mechanical/ natural ventilation	2	1.1
0	0	0	0	0	0	0	n	0	min	0	0	0	0	4-5 days a week	1	0	closed containers	0	0	no cabin	1	0	None	1	1	0	regular inspections	0	No daily cleaning	0.01	0	no control measures	1	0	>1000 m3	3	0	Mechanical/ natural ventilation	2	1.1
0	0	0	0	0	0	0	n	0	min	0	0	0	0	4-5 days a week	1	0	closed containers	0	0	no cabin	1	0	None	1	1	0	regular inspections	0	No daily cleaning	0.01	0	no control measures	1	0	>1000 m3	3	0	Mechanical/ natural ventilation	2	1.1
0	0	0	0	0	0	0	n	0	min	0	0	0	0	4-5 days a week	1	0	closed containers	0	0	no cabin	1	0	None	1	1	0	regular inspections	0	No daily cleaning	0.01	0	no control measures	1	0	>1000 m3	3	0	Mechanical/ natural ventilation	2	1.1
0	0	0	0	0	0	0	n	0	min	0	0	0	0	4-5 days a week	1	0	closed containers	0	0	no cabin	1	0	None	1	1	0	regular inspections	0	No daily cleaning	0.01	0	no control measures	1	0	>1000 m3	3	0	Mechanical/ natural ventilation	2	1.1
0	0	0	0	0	0	0	n	0	min	0	0	0	0	4-5 days a week	1	0	closed containers	0	0	no cabin	1	0	None	1	1	0	regular inspections	0	No daily cleaning	0.01	0	no control measures	1	0	>1000 m3	3	0	Mechanical/ natural ventilation	2	1.1
0	0	0	0	0	0	0	n	0	min	0	0	0	0	4-5 days a week	1	0	closed containers	0	0	no cabin	1	0	None	1	1	0	regular inspections	0	No daily cleaning	0.01	0	no control measures	1	0	>1000 m3	3	0	Mechanical/ natural ventilation	2	1.1
0	0	0	0	0	0	0	n	0	min	0	0	0	0	4-5 days a week	1	0	closed containers	0	0	no cabin	1	0	None	1	1	0	regular inspections	0	No daily cleaning	0.01	0	no control measures	1	0	>1000 m3	3	0	Mechanical/ natural ventilation	2	1.1
0	0	0	0	0	0	0	n	0	min	0	0	0	0	4-5 days a week	1	0	closed containers	0	0	no cabin	1	0	None	1	1	0	regular inspections	0	No daily cleaning	0.01	0	no control measures	1	0	>1000 m3	3	0	Mechanical/ natural ventilation	2	1.1
0	0	0	0	0	0	0	n	0	min	0	0	0	0	4-5 days a week	1	0	closed containers	0	0	no cabin	1	0	None	1	1	0	regular inspections	0	No daily cleaning	0.01	0	no control measures	1	0	>1000 m3	3	0	Mechanical/ natural ventilation	2	1.1
0	0	0	0	0	0	0	n	0	min	0	0	0	0	4-5 days a week	1	0	closed containers	0	0	no cabin	1	0	None	1	1	0	regular inspections	0	No daily cleaning	0.01	0	no control measures	1	0	>1000 m3	3	0	Mechanical/ natural ventilation	2	1.1
0	0	0	0	0	0	0	n	0	min	0	0	0	0	4-5 days a week	1	0	closed containers	0	0	no cabin	1	0	None	1	1	0	regular inspections	0	No daily cleaning	0.01	0	no control measures	1	0	>1000 m3	3	0	Mechanical/ natural ventilation	2	1.1
0	0	0	0	0	0	0	n	0	min	0	0	0	0	4-5 days a week	1	0	closed containers	0	0	no cabin	1	0	None	1	1	0	regular inspections	0	No daily cleaning	0.01	0	no control measures	1	0	>1000 m3	3	0	Mechanical/ natural ventilation	2	1.1
0	0	0	0	0	0	0	n	0	min	0	0	0	0	4-5 days a week	1	0	closed containers	0	0	no cabin	1	0	None	1	1	0	regular inspections	0	No daily cleaning	0.01	0	no control measures	1	0	>1000 m3	3	0	Mechanical/ natural ventilation	2	1.1
0	0	0	0	0	0	0	n	0	min	0	0	0	0	4-5 days a week	1	0	closed containers	0	0	no cabin	1	0	None	1	1	0	regular inspections	0	No daily cleaning	0.01	0	no control measures	1	0	>1000 m3	3	0	Mechanical/ natural ventilation	2	1.1
0	0	0	0	0	0	0	n	0	min	0	0	0	0	4-5 days a week	1	0	closed containers	0	0	no cabin	1	0	None	1	1	0	regular inspections	0	No daily cleaning	0.01	0	no control measures	1	0	>1000 m3	3	0	Mechanical/ natural ventilation	2	1.1
0	0	0	0	0	0	0	n	0	min	0	0	0	0	4-5 days a week	1	0	closed containers	0	0	no cabin	1	0	None	1	1	0	regular inspections	0	No daily cleaning	0.01	0	no control measures	1	0	>1000 m3	3	0	Mechanical/ natural ventilation	2	1.1
0	0	0	0	0	0	0	n	0	min	0	0	0	0	4-5 days a week	1	0	closed containers	0	0	no cabin	1	0	None	1	1	0	regular inspections	0	No daily cleaning	0.01	0	no control measures	1	0	>1000 m3	3	0	Mechanical/ natural ventilation	2	1.1
0	0	0	0	0	0	0	n	0	min	0	0	0	0	4-5 days a week	1	0	closed containers	0	0	no cabin	1	0	None	1	1	0	regular inspections	0	No daily cleaning	0.01	0	no control measures	1	0	>1000 m3	3	0	Mechanical/ natural ventilation	2	1.1
0	0	0	0	0	0	0	n	0	min	0	0	0	0	4-5 days a week	1	0	closed containers	0	0	no cabin	1	0	None	1	1	0	regular inspections	0	No daily cleaning	0.01	0	no control measures	1	0	>1000 m3	3	0	Mechanical/ natural ventilation	2	1.1
0	0	0	0	0	0	0	n	0	min	0	0	0	0	4-5 days a week	1	0	closed containers	0	0	no cabin	1	0	None	1	1	0	regular inspections	0	No daily cleaning	0.01	0	no control measures	1	0	>1000 m3	3	0	Mechanical/ natural ventilation	2	1.1
0	0	0	0	0	0	0	n	0	min	0	0	0	0	4-5 days a week	1	0	closed containers	0	0	no cabin	1	0	None	1	1	0	regular inspections	0	No daily cleaning	0.01	0	no control measures	1	0	>1000 m3	3	0	Mechanical/ natural ventilation	2	1.1
0	0	0	0	0	0	0	n	0	min	0	0	0	0	4-5 days a week	1	0	closed containers	0	0	no cabin	1	0	None	1	1	0	regular inspections	0	No daily cleaning	0.01	0	no control measures	1	0	>1000 m3	3	0	Mechanical/ natural ventilation	2	1.1
0	0	0	0	0	0	0	n	0	min	0	0	0	0	4-5 days a week	1	0	closed containers	0	0	no cabin	1	0	None	1	1	0	regular inspections	0	No daily cleaning	0.01	0	no control measures	1	0	>1000 m3	3	0	Mechanical/ natural ventilation	2	1.1
0	0	0	0	0	0	0	n	0	min	0	0	0	0	4-5 days a week	1	0	closed containers	0	0	no cabin	1	0	None	1	1	0	regular inspections	0	No daily cleaning	0.01	0	no control measures	1	0	>1000 m3	3	0	Mechanical/ natural ventilation	2	1.1
0	0	0	0	0	0	0	n	0	min	0	0	0	0	4-5 days a week	1	0	closed containers	0	0	no cabin	1	0	None	1	1	0	regular inspections	0	No daily cleaning	0.01	0	no control measures	1	0	>1000 m3	3	0	Mechanical/ natural ventilation	2	1.1
0	0	0	0	0	0	0	n	0	min	0	0	0	0	4-5 days a week	1	0	closed containers	0	0	no cabin	1	0	None	1	1	0	regular inspections	0	No daily cleaning	0.01	0	no control measures	1	0	>1000 m3	3	0	Mechanical/ natural ventilation	2	1.1
0	0	0	0	0	0	0	n	0	min	0	0	0	0	4-5 days a week	1	0	closed containers	0	0	no cabin	1	0	None	1	1	0	regular inspections	0	No daily cleaning	0.01	0	no control measures	1	0	>1000 m3	3	0	Mechanical/ natural ventilation	2	1.1
0	0	0	0	0	0	0	n	0	min	0	0	0	0	4-5 days a week	1	0	closed containers	0	0	no cabin	1	0	None	1	1	0	regular inspections	0	No daily cleaning	0.01	0	no control measures	1	0	>1000 m3	3	0	Mechanical/ natural ventilation	2	1.1
0	0	0	0	0	0	0	n	0	min	0	0	0	0	4-5 days a week	1	0	closed containers	0	0	no cabin	1	0	None	1	1	0	regular inspections	0	No daily cleaning	0.01	0	no control measures	1	0	>1000 m3	3	0	Mechanical/ natural ventilation	2	1.1
0	0	0	0	0	0	0	n	0	min	0	0	0	0	4-5 days a week	1	0	closed containers	0	0	no cabin	1	0	None	1	1	0	regular inspections	0	No daily cleaning	0.01	0	no control measures	1	0	>1000 m3	3	0	Mechanical/ natural ventilation	2	1.1
0	0	0	0	0	0	0	n	0	min	0	0	0	0	4-5 days a week	1	0	closed containers	0	0	no cabin	1	0	None	1	1	0	regular inspections	0	No daily cleaning	0.01	0	no control measures	1	0	>1000 m3	3	0	Mechanical/ natural ventilation	2	1.1
0	0	0	0	0	0	0	n	0	min	0	0	0	0	4-5 days a week	1	0	closed containers	0	0	no cabin	1	0	None	1	1	0	regular inspections	0	No daily cleaning	0.01	0	no control measures	1	0	>1000 m3	3	0	Mechanical/ natural ventilation	2	1.1
0	0	0	0	0	0	0	n	0	min	0	0	0	0	4-5 days a week	1	0	closed containers	0	0	no cabin	1	0	None	1	1	0	regular inspections	0	No daily cleaning	0.01	0	no control measures	1	0	>1000 m3	3	0	Mechanical/ natural ventilation	2	1.1
0	0	0	0	0	0	0	n	0	min	0	0	0	0	4-5 days a week	1	0	closed containers	0	0	no cabin	1	0	None	1	1	0	regular inspections	0	No daily cleaning	0.01	0	no control measures	1	0	>1000 m3	3	0	Mechanical/ natural ventilation	2	1.1
0	0	0	0	0	0	0	n	0	min	0	0	0	0	4-5 days a week	1	0	closed containers	0	0	no cabin	1	0	None	1	1	0	regular inspections	0	No daily cleaning	0.01	0	no control measures	1	0	>1000 m3	3	0	Mechanical/ natural ventilation	2	1.1
0	0	0	0	0	0	0	n	0	min	0	0	0	0	4-5 days a week	1	0	closed containers	0	0	no cabin	1	0	None	1	1	0	regular inspections	0	No daily cleaning	0.01	0	no control measures	1	0	>1000 m3	3	0	Mechanical/ natural ventilation	2	1.1
0	0	0	0	0	0	0	n	0	min	0	0	0	0	4-5 days a week	1	0	closed containers	0	0	no cabin	1	0	None	1	1	0	regular inspections	0	No daily cleaning	0.01	0	no control measures	1	0	>1000 m3	3	0	Mechanical/ natural ventilation	2	1.1
0	0	0	0	0	0	0	n	0	min	0	0	0	0	4-5 days a week	1	0	closed containers	0	0	no cabin	1	0	None	1	1	0	regular inspections	0	No daily cleaning	0.01	0	no control measures	1	0	>1000 m3	3	0	Mechanical/ natural ventilation	2	1.1
0	0	0	0	0	0	0	n	0	min	0	0	0	0	4-5 days a week	1	0	closed containers	0	0	no cabin	1	0	None	1	1	0	regular inspections	0	No daily cleaning	0.01	0	no control measures	1	0	>1000 m3	3	0	Mechanical/ natural ventilation	2	1.1
0	0	0	0	0	0	0	n	0	min	0	0	0	0	4-5 days a week	1	0	closed containers	0	0	no cabin	1	0	None	1	1	0	regular inspections	0	No daily cleaning	0.01	0	no control measures	1	0	>1000 m3	3	0	Mechanical/ natural ventilation	2	1.1
0	0	0	0	0	0	0	n	0	min	0	0	0	0	4-5 days a week	1	0	closed containers	0	0	no cabin	1	0	None	1	1	0	regular inspections	0	No daily cleaning	0.01	0	no control measures	1	0	>1000 m3	3	0	Mechanical/ natural ventilation	2	1.1
0	0	0	0	0	0	0	n	0	min	0	0	0	0	4-5 days a week	1	0	closed containers	0	0	no cabin	1	0	None	1	1	0	regular inspections	0	No daily cleaning	0.01	0	no control measures	1	0	>1000 m3	3	0	Mechanical/ natural ventilation	2	1.1
0	0	0	0	0	0	0	n	0	min	0	0	0	0	4-5 days a week	1	0	closed containers	0	0	no cabin	1	0	None	1	1	0	regular inspections	0	No daily cleaning	0.01	0	no control measures	1	0	>1000 m3	3	0	Mechanical/ natural ventilation	2	1.1
0	0	0	0	0	0	0	n	0	min	0	0	0	0	4-5 days a week	1	0	closed containers	0	0	no cabin	1	0	None	1	1	0	regular inspections	0	No daily cleaning	0.01	0	no control measures	1	0	>1000 m3	3	0	Mechanical/ natural ventilation	2	1.1
0	0	0	0	0	0	0	n	0	min	0	0	0	0	4-5 days a week	1	0	closed containers	0	0	no cabin	1	0	None	1	1	0	regular inspections	0	No daily cleaning	0.01	0	no control measures	1	0	>1000 m3	3	0	Mechanical/ natural ventilation	2	1.1
0	0	0	0	0	0	0	n	0	min	0	0	0	0	4-5 days a week	1	0	closed containers	0	0	no cabin	1	0	None	1	1	0	regular inspections	0	No daily cleaning	0.01	0	no control measures	1	0	>1000 m3	3	0	Mechanical/ natural ventilation	2	1.1
0	0	0	0	0	0	0	n	0	min	0	0	0	0	4-5 days a week	1	0	closed containers	0	0	no cabin	1	0	None	1	1	0	regular inspections	0	No daily cleaning	0.01	0	no control measures	1	0	>1000 m3	3	0	Mechanical/ natural ventilation	2	1.1
0	0	0	0	0	0	0	n	0	min	0	0	0	0	4-5 days a week	1	0	closed containers	0	0	no cabin	1	0	None	1	1	0	regular inspections	0	No daily cleaning	0.01	0	no control measures	1	0	>1000 m3	3	0	Mechanical/ natural ventilation	2	1.1
0	0	0	0	0	0	0	n	0	min	0	0	0	0	4-5 days a week	1	0	closed containers	0	0	no cabin	1	0	None	1	1	0	regular inspections	0	No daily cleaning	0.01	0	no control measures	1	0	>1000 m3	3	0	Mechanical/ natural ventilation	2	1.1
0	0	0	0	0	0	0	n	0	min	0	0	0	0	4-5 days a week	1	0	closed containers	0	0	no cabin	1	0	None	1	1	0	regular inspections	0	No daily cleaning	0.01	0	no control measures	1	0	>1000 m3	3	0	Mechanical/ natural ventilation	2	1.1
0	0	0	0	0	0	0	n	0	min	0	0	0	0	4-5 days a week	1	0	closed containers	0	0	no cabin	1	0	None	1	1	0	regular inspections	0	No daily cleaning	0.01	0	no control measures	1	0	>1000 m3	3	0	Mechanical/ natural ventilation	2	1.1
0	0	0	0	0	0	0	n	0	min	0	0	0	0	4-5 days a week	1	0	closed containers	0	0	no cabin	1	0	None	1	1	0	regular inspections	0	No daily cleaning	0.01	0	no control measures	1	0	>1000 m3	3	0	Mechanical/ natural ventilation	2	1.1
0	0	0	0	0	0	0	n	0	min	0	0	0	0	4-5 days a week	1	0	closed containers	0	0	no cabin	1	0	None	1	1	0	regular inspections	0	No daily cleaning	0.01	0	no control measures	1	0	>1000 m3	3	0	Mechanical/ natural ventilation	2	1.1
0	0	0	0	0	0	0	n	0	min	0	0	0	0	4-5 days a week	1	0	closed containers	0	0	no cabin	1	0	None	1	1	0	regular inspections	0	No daily cleaning	0.01	0	no control measures	1	0	>1000 m3	3	0	Mechanical/ natural ventilation	2	1.1
0	0	0	0	0	0	0	n	0	min	0	0	0	0	4-5 days a week	1	0	closed containers	0	0	no cabin	1	0	None	1	1	0	regular inspections	0	No daily cleaning	0.01	0	no control measures	1	0	>1000 m3	3	0	Mechanical/ natural ventilation	2	1.1
0	0	0	0	0	0	0	n	0	min	0	0	0	0	4-5 days a week	1	0	closed containers	0	0	no cabin	1	0	None	1	1	0	regular inspections	0	No daily cleaning	0.01	0	no control measures	1	0	>1000 m3	3	0	Mechanical/ natural ventilation	2	1.1
0	0	0	0	0	0	0	n	0	min	0	0	0	0	4-5 days a week	1	0	closed containers	0	0	no cabin	1	0	None	1	1	0	regular inspections	0	No daily cleaning	0.01	0	no control measures	1	0	>1000 m3	3	0	Mechanical/ natural ventilation	2	1.1
0	0	0	0	0	0	0	n	0	min	0	0	0	0	4-5 days a week	1	0	closed containers	0	0	no cabin	1	0	None	1	1	0	regular inspections	0	No daily cleaning	0.01	0	no control measures	1	0	>1000 m3	3	0	Mechanical/ natural ventilation	2	1.1
0	0	0	0	0	0	0	n	0	min	0	0	0	0	4-5 days a week	1	0	closed containers	0	0	no cabin	1	0	None	1	1	0	regular inspections	0	No daily cleaning	0.01	0	no control measures	1	0	>1000 m3	3	0	Mechanical/ natural ventilation	2	1.1
0	0	0	0	0	0	0	n	0	min	0	0	0	0	4-5 days a week	1	0	closed containers	0	0	no cabin	1	0	None	1	1	0	regular inspections	0	No daily cleaning	0.01	0	no control measures	1	0	>1000 m3	3	0	Mechanical/ natural ventilation	2	1.1
0	0	0	0	0	0	0	n	0	min	0	0	0	0	4-5 days a week	1	0	closed containers	0	0	no cabin	1	0	None	1	1	0	regular inspections	0	No daily cleaning	0.01	0	no control measures	1	0	>1000 m3	3	0	Mechanical/ natural ventilation	2	1.1
0	0	0	0	0	0	0	n	0	min	0	0	0	0	4-5 days a week	1	0	closed containers	0	0	no cabin	1	0	None	1	1	0	regular inspections	0	No daily cleaning	0.01	0	no control measures	1	0	>1000 m3	3	0	Mechanical/ natural ventilation	2	1.1
0	0	0	0	0	0	0	n	0	min	0	0	0	0	4-5 days a week	1	0	closed containers	0	0	no cabin	1	0	None	1	1	0	regular inspections	0	No daily cleaning	0.01	0	no control measures	1	0	>1000 m3	3	0	Mechanical/ natural ventilation	2	1.1
0	0	0	0	0	0	0	n	0	min	0	0	0	0	4-5 days a week	1	0	closed containers	0	0	no cabin	1	0	None	1	1	0	regular inspections	0	No daily cleaning	0.01	0	no control measures	1	0	>1000 m3	3	0	Mechanical/ natural ventilation	2	1.1
0	0	0	0	0	0	0	n	0	min	0	0	0	0	4-5 days a week	1	0	closed containers	0	0	no cabin	1	0	None	1	1	0	regular inspections	0	No daily cleaning	0.01	0	no control measures	1	0	>1000 m3	3	0	Mechanical/ natural ventilation	2	1.1
0	0	0	0	0	0	0	n	0	min	0	0	0	0	4-5 days a week	1	0	closed containers	0	0	no cabin	1	0	None	1	1	0	regular inspections	0	No daily cleaning	0.01	0	no control measures	1	0	>1000 m3	3	0	Mechanical/ natural ventilation	2	1.1
0	0	0	0	0	0	0	n	0	min	0	0	0	0	4-5 days a week	1	0	closed containers	0	0	no cabin	1	0	None	1	1	0	regular inspections	0	No daily cleaning	0.01	0	no control measures	1	0	>1000 m3	3	0	Mechanical/ natural ventilation	2	1.1
0	0	0	0	0	0	0	n	0	min	0	0	0	0	4-5 days a week	1	0	closed containers	0	0	no cabin	1	0	None	1	1	0	regular inspections	0	No daily cleaning	0.01	0	no control measures	1	0	>1000 m3	3	0	Mechanical/ natural ventilation	2	1.1
0	0	0	0	0	0	0	n	0	min	0	0	0	0	4-5 days a week	1	0	closed containers	0	0	no cabin	1	0	None	1	1	0	regular inspections	0	No daily cleaning	0.01	0	no control measures	1	0	>1000 m3	3	0	Mechanical/ natural ventilation	2	1.1
0	0	0	0	0	0	0	n	0	min	0	0	0	0	4-5 days a week	1	0	closed containers	0	0	no cabin	1	0	None	1	1	0	regular inspections	0	No daily cleaning	0.01	0	no control measures	1	0	>1000 m3	3	0	Mechanical/ natural ventilation	2	1.1
0	0	0	0	0	0	0	n	0	min	0	0	0	0	4-5 days a week	1	0	closed containers	0	0	no cabin	1	0	None	1	1	0	regular inspections	0	No daily cleaning	0.01	0	no control measures	1	0	>1000 m3	3	0	Mechanical/ natural ventilation	2	1.1
0	0	0	0	0	0	0	n	0	min	0	0	0	0	4-5 days a week	1	0	closed containers	0	0	no cabin	1	0	None	1	1	0	regular inspections	0	No daily cleaning	0.01	0	no control measures	1	0	>1000 m3	3	0	Mechanical/ natural ventilation	2	1.1
0	0	0	0	0	0	0	n	0	min	0	0	0	0	4-5 days a week	1	0	closed containers	0	0	no cabin	1	0	None	1	1	0	regular inspections	0	No daily cleaning	0.01	0	no control measures	1	0	>1000 m3	3	0	Mechanical/ natural ventilation	2	1.1
0	0	0	0	0	0	0	n	0	min	0	0	0	0	4-5 days a week	1	0	closed containers	0	0	no cabin	1	0	None	1	1	0	regular inspections	0	No daily cleaning	0.01	0	no control measures	1	0	>1000 m3	3	0	Mechanical/ natural ventilation	2	1.1
0	0	0	0	0	0	0	n	0	min	0	0	0	0	4-5 days a week	1	0	closed containers	0	0	no cabin	1	0	None	1	1	0	regular inspections	0	No daily cleaning	0.01	0	no control measures	1	0	>1000 m3	3	0	Mechanical/ natural ventilation	2	1.1
0	0	0	0	0	0	0	n	0	min	0	0	0	0	4-5 days a week	1	0	closed containers	0	0	no cabin	1	0	None	1	1	0	regular inspections	0	No daily cleaning	0.01	0	no control measures	1	0	>1000 m3	3	0	Mechanical/ natural ventilation	2	1.1
0	0	0	0	0	0	0	n	0	min	0	0	0	0	4-5 days a week	1	0	closed containers	0	0	no cabin	1	0	None	1	1	0	regular inspections	0	No daily cleaning	0.01	0	no control measures	1	0	>1000 m3	3	0	Mechanical/ natural ventilation	2	1.1
0	0	0	0	0	0	0	n	0	min	0	0	0	0	4-5 days a week	1	0	closed containers	0	0	no cabin	1	0	None	1	1	0	regular inspections	0	No daily cleaning	0.01	0	no control measures	1	0	>1000 m3	3	0	Mechanical/ natural ventilation	2	1.1
0	0	0	0	0	0	0	n	0	min	0	0	0	0	4-5 days a week	1	0	closed containers	0	0	no cabin	1	0	None	1	1	0	regular inspections	0	No daily cleaning	0.01	0	no control measures	1	0	>1000 m3	3	0	Mechanical/ natural ventilation	2	1.1
0	0	0	0	0	0	0	n	0	min	0	0	0	0	4-5 days a week	1	0	closed containers	0	0	no cabin	1	0	None	1	1	0	regular inspections	0	No daily cleaning	0.01	0	no control measures	1	0	>1000 m3	3	0	Mechanical/ natural ventilation	2	1.1
0	0	0	0	0	0	0	n	0	min	0	0	0	0	4-5 days a week	1	0	closed containers	0	0	no cabin	1	0	None	1	1	0	regular inspections	0	No daily cleaning	0.01	0	no control measures	1	0	>1000 m3	3	0	Mechanical/ natural ventilation	2	1.1
0	0	0	0	0	0	0	n	0	min	0	0	0	0	4-5 days a week	1	0	closed containers	0	0	no cabin	1	0	None	1	1	0	regular inspections	0	No daily cleaning	0.01	0	no control measures	1	0	>1000 m3	3	0	Mechanical/ natural ventilation	2	1.1
0	0	0	0	0	0	0	n	0	min	0	0	0	0	4-5 days a week	1	0	closed containers	0	0	no cabin	1	0	None	1	1	0	regular inspections	0	No daily cleaning	0.01	0	no control measures	1	0	>1000 m3	3	0	Mechanical/ natural ventilation	2	1.1
0	0	0	0	0	0	0	n	0	min	0	0	0	0	4-5 days a week	1	0	closed containers	0	0	no cabin	1	0	None	1	1	0	regular inspections	0	No daily cleaning	0.01	0	no control measures	1	0	>1000 m3	3	0	Mechanical/ natural ventilation	2	1.1
0	0	0	0	0	0	0	n	0	min	0	0	0	0	4-5 days a week	1	0	closed containers	0	0	no cabin	1	0	None	1	1	0	regular inspections	0	No daily cleaning	0.01	0	no control measures	1	0	>1000 m3	3	0	Mechanical/ natural ventilation	2	1.1
0	0	0	0	0	0	0	n	0	min	0	0	0	0	4-5 days a week	1	0	closed containers	0	0	no cabin	1	0	None	1	1	0	regular inspections	0	No daily cleaning	0.01	0	no control measures	1	0	>1000 m3	3	0	Mechanical/ natural ventilation	2	1.1
0	0	0	0	0	0	0	n	0	min	0	0	0	0	4-5 days a week	1	0	closed containers	0	0	no cabin	1	0	None	1	1	0	regular inspections	0	No daily cleaning	0.01	0	no control measures	1	0	>1000 m3	3	0	Mechanical/ natural ventilation	2	1.1
0	0	0	0	0	0	0	n	0	min	0	0	0	0	4-5 days a week	1	0	closed containers	0	0	no cabin	1	0	None	1	1	0	regular inspections	0	No daily cleaning	0.01	0	no control measures	1	0	>1000 m3	3	0	Mechanical/ natural ventilation	2	1.1
0	0	0	0	0	0	0	n	0	min	0	0	0	0	4-5 days a week	1	0	closed containers	0	0	no cabin	1	0	None	1	1	0	regular inspections	0	No daily cleaning	0.01	0	no control measures	1	0	>1000 m3	3	0	Mechanical/ natural ventilation	2	1.1
0	0	0	0	0	0	0	n	0	min	0	0	0	0	4-5 days a week	1	0	closed containers	0	0	no cabin	1	0	None	1	1	0	regular inspections	0	No daily cleaning	0.01	0	no control measures	1	0	>1000 m3	3	0	Mechanical/ natural ventilation	2	1.1
0	0	0	0	0	0	0	n	0	min	0	0	0	0	4-5 days a week	1	0	closed containers	0	0	no cabin	1	0	None	1	1	0	regular inspections	0	No daily cleaning	0.01	0	no control measures	1	0	>1000 m3	3	0	Mechanical/ natural ventilation	2	1.1
0	0	0	0	0	0	0	n	0	min	0	0	0	0	4-5 days a week	1	0	closed containers	0	0	no cabin	1	0	None	1	1	0	regular inspections	0	No daily cleaning	0.01	0	no control measures	1	0	>1000 m3	3	0	Mechanical/ natural ventilation	2	1.1
0	0	0	0	0	0	0	n	0	min	0	0	0	0	4-5 days a week	1	0	closed containers	0	0	no cabin	1	0	None	1	1	0	regular inspections	0	No daily cleaning	0.01	0	no control measures	1	0	>1000 m3	3	0	Mechanical/ natural ventilation	2	1.1
0	0	0	0	0	0	0	n	0	min	0	0	0	0	4-5 days a week	1	0	closed containers	0	0	no cabin	1	0	None	1	1	0	regular inspections	0	No daily cleaning	0.01	0	no control measures	1	0	>1000 m3	3	0	Mechanical/ natural ventilation	2	1.1
0	0	0	0	0	0	0	n	0	min	0	0	0	0	4-5 days a week	1	0	closed containers	0	0	no cabin	1	0	None	1	1	0	regular inspections	0	No daily cleaning	0.01	0	no control measures	1	0	>1000 m3	3	0	Mechanical/ natural ventilation	2	1.1
0	0	0	0	0	0	0	n	0	min	0	0	0	0	4-5 days a week	1	0	closed containers	0	0	no cabin	1	0	None	1	1	0	regular inspections	0	No daily cleaning	0.01	0	no control measures	1	0	>1000 m3	3	0	Mechanical/ natural ventilation	2	1.1
0	0	0	0	0	0	0	n	0	min	0	0	0	0	4-5 days a week	1	0	closed containers	0	0	no cabin	1	0	None	1	1	0	regular inspections	0	No daily cleaning	0.01	0	no control measures	1	0	>1000 m3	3	0	Mechanical/ natural ventilation	2	1.1
0	0	0	0	0	0	0	n	0	min	0	0	0	0	4-5 days a week	1	0	closed containers	0	0	no cabin	1	0	None	1	1	0	regular inspections	0	No daily cleaning	0.01	0	no control measures	1	0	>1000 m3	3	0	Mechanical/ natural ventilation	2	1.1
0	0	0	0	0	0	0	n	0	min	0	0	0	0	4-5 days a week	1	0	closed containers	0	0	no cabin	1	0	None	1	1	0	regular inspections	0	No daily cleaning	0.01	0	no control measures	1	0	>1000 m3	3	0	Mechanical/ natural ventilation	2	1.1
0	0	0	0	0	0	0	n	0	min	0	0	0	0	4-5 days a week	1	0	closed containers	0	0	no cabin	1	0	None	1	1	0	regular inspections	0	No daily cleaning	0.01	0	no control measures	1	0	>1000 m3	3	0	Mechanical/ natural ventilation	2	1.1
0	0	0	0	0	0	0	n	0	min	0	0	0	0	4-5 days a week	1	0	closed containers	0	0	no cabin	1	0	None	1	1	0	regular inspections	0	No daily cleaning	0.01	0	no control measures	1	0	>1000 m3	3	0	Mechanical/ natural ventilation	2	1.1
0	0	0	0	0	0	0	n	0	min	0	0	0	0	4-5 days a week	1	0	closed containers	0	0	no cabin	1	0	None	1	1	0	regular inspections	0	No daily cleaning	0.01	0	no control measures	1	0	>1000 m3	3	0	Mechanical/ natural ventilation	2	1.1
0	0	0	0	0	0	0	n	0	min	0	0	0	0	4-5 days a week	1	0	closed containers	0	0	no cabin	1	0	None	1	1	0	regular inspections	0	No daily cleaning	0.01	0	no control measures	1	0	>1000 m3	3	0	Mechanical/ natural ventilation	2	1.1
0	0	0	0	0	0	0	n	0	min	0	0	0	0	4-5 days a week	1	0	closed containers	0	0	no cabin	1	0	None	1	1	0	regular inspections	0	No daily cleaning	0.01	0	no control measures	1	0	>1000 m3	3	0	Mechanical/ natural ventilation	2	1.1
0	0	0	0	0	0	0	n	0	min	0	0	0	0	4-5 days a week	1	0	closed containers	0	0	no cabin	1	0	None	1	1	0	regular inspections	0	No daily cleaning	0.01	0	no control measures	1	0	>1000 m3	3	0	Mechanical/ natural ventilation	2	1.1
0	0	0	0	0	0	0	n	0	min	0	0	0	0	4-5 days a week	1	0	closed containers	0	0	no cabin	1	0	None	1	1	0	regular inspections	0	No daily cleaning	0.01	0	no control measures	1	0	>1000 m3	3	0	Mechanical/ natural ventilation	2	1.1
0	0	0	0	0	0	0	n	0	min	0	0	0	0	4-5 days a week	1	0	closed containers	0	0	no cabin	1	0	None	1	1	0	regular inspections	0	No daily cleaning	0.01	0	no control measures	1	0	>1000 m3	3	0	Mechanical/ natural ventilation	2	1.1
0	0	0	0	0	0	0	n	0	min	0	0	0	0	4-5 days a week	1	0	closed containers	0	0	no cabin	1	0	None	1	1	0	regular inspections	0	No daily cleaning	0.01	0	no control measures	1	0	>1000 m3	3	0	Mechanical/ natural ventilation	2	1.1
0	0	0	0	0	0	0	n	0	min	0	0	0	0	4-5 days a week	1	0	closed containers	0	0	no cabin	1	0	None	1	1	0	regular inspections	0	No daily cleaning	0.01	0	no control measures	1	0	>1000 m3	3	0	Mechanical/ natural ventilation	2	1.1
0	0	0	0	0	0	0	n	0	min	0	0	0	0	4-5 days a week	1	0	closed containers	0	0	no cabin	1	0	None	1	1	0	regular inspections	0	No daily cleaning	0.01	0	no control measures	1	0	>1000 m3	3	0	Mechanical/ natural ventilation	2	1.1
0	0	0	0	0	0	0	n	0	min	0	0	0	0	4-5 days a week	1	0	closed containers	0	0	no cabin	1	0	None	1	1	0	regular inspections	0	No daily cleaning	0.01	0	no control measures	1	0	>1000 m3	3	0	Mechanical/ natural ventilation	2	1.1
0	0	0	0	0	0	0	n	0	min	0	0	0	0	4-5 days a week	1	0	closed containers	0	0	no cabin	1	0	None	1	1	0	regular inspections	0	No daily cleaning	0.01	0	no control measures	1	0	>1000 m3	3	0	Mechanical/ natural ventilation	2	1.1
0	0	0	0	0	0	0	n	0	min	0	0	0	0	4-5 days a week	1	0	closed containers	0	0	no cabin	1	0	None	1	1	0	regular inspections	0	No daily cleaning	0.01	0	no control measures	1	0	>1000 m3	3	0	Mechanical/ natural ventilation	2	1.1
0	0	0	0	0	0	0	n	0	min	0	0	0	0	4-5 days a week	1	0	closed containers	0	0	no cabin	1	0	None	1	1	0	regular inspections	0	No daily cleaning	0.01	0	no control measures	1	0	>1000 m3	3	0	Mechanical/ natural ventilation	2	1.1
0	0	0	0	0	0	0	n	0	min	0	0	0	0	4-5 days a week	1	0	closed containers	0	0	no cabin	1	0	None	1	1	0	regular inspections	0	No daily cleaning	0.01	0	no control measures	1	0	>1000 m3	3	0	Mechanical/ natural ventilation	2	1.1
0	0	0	0	0	0	0	n	0	min	0	0	0	0	4-5 days a week	1	0	closed containers	0	0	no cabin	1	0	None	1	1	0	regular inspections	0	No daily cleaning	0.01	0	no control measures	1	0	>1000 m3	3	0	Mechanical/ natural ventilation	2	1.1
0	0	0	0	0	0	0	n	0	min	0	0	0	0	4-5 days a week	1	0	closed containers	0	0	no cabin	1	0	None	1	1	0	regular inspections	0	No daily cleaning	0.01	0	no control measures	1	0	>1000 m3	3	0	Mechanical/ natural ventilation	2	1.1
0	0	0	0	0	0	0	n	0	min	0	0	0	0	4-5 days a week	1	0	closed containers	0	0	no cabin	1	0	None	1	1	0	regular inspections	0	No daily cleaning	0.01	0	no control measures	1	0	>1000 m3	3	0	Mechanical/ natural ventilation	2	1.1
0	0	0	0	0	0	0	n	0	min	0	0	0	0	4-5 days a week	1	0	closed containers	0	0	no cabin	1	0	None	1	1	0	regular inspections	0	No daily cleaning	0.01	0	no control measures	1	0	>1000 m3	3	0	Mechanical/ natural ventilation	2	1.1
0	0	0	0	0	0	0	n	0	min	0	0	0	0	4-5 days a week	1	0	closed containers	0	0	no cabin	1	0	None	1	1	0	regular inspections	0	No daily cleaning	0.01	0	no control measures	1	0	>1000 m3	3	0	Mechanical/ natural ventilation	2	1.1
0	0	0	0	0	0	0	n	0	min	0	0	0	0	4-5 days a week	1	0	closed containers	0	0	no cabin	1	0	None	1	1	0	regular inspections	0	No daily cleaning	0.01	0	no control measures	1	0	>1000 m3	3	0	Mechanical/ natural ventilation	2	1.1
0	0	0	0	0	0	0	n	0	min	0	0	0	0	4-5 days a week	1	0	closed containers	0	0	no cabin	1	0	None	1	1	0	regular inspections	0	No daily cleaning	0.01	0	no control measures	1	0	>1000 m3	3	0	Mechanical/ natural ventilation	2	1.1
0	0	0	0	0	0	0	n	0	min	0	0	0	0	4-5 days a week	1	0	closed containers	0	0	no cabin	1	0	None	1	1	0	regular inspections	0	No daily cleaning	0.01	0	no control measures	1	0	>1000 m3	3	0	Mechanical/ natural ventilation	2	1.1
0	0	0	0	0	0	0	n	0	min	0	0	0	0	4-5 days a week	1	0	closed containers	0	0	no cabin	1	0	None	1	1	0	regular inspections	0	No daily cleaning	0.01	0	no control measures	1	0	>1000 m3	3	0	Mechanical/ natural ventilation	2	1.1
0	0	0	0	0	0	0	n	0	min	0	0	0	0	4-5 days a week	1	0	closed containers	0	0	no cabin	1	0	None	1	1	0	regular inspections	0	No daily cleaning	0.01	0	no control measures	1	0	>1000 m3	3	0	Mechanical/ natural ventilation	2	1.1
0	0	0	0	0	0	0	n	0	min	0	0	0	0	4-5 days a week	1	0	closed containers	0	0	no cabin	1	0	None	1	1	0	regular inspections	0	No daily cleaning	0.01	0	no control measures	1	0	>1000 m3	3	0	Mechanical/ natural ventilation	2	1.1
0	0	0	0	0	0	0	n	0	min	0	0	0	0	4-5 days a week	1	0	closed containers	0	0	no cabin	1	0	None	1	1	0	regular inspections	0	No daily cleaning	0.01	0	no control measures	1	0	>1000 m3	3	0	Mechanical/ natural ventilation	2	1.1
0	0	0	0	0	0	0	n	0	min	0	0	0	0	4-5 days a week	1	0	closed containers	0	0	no cabin	1	0	None	1	1	0	regular inspections	0	No daily cleaning	0.01	0	no control measures	1	0	>1000 m3	3	0	Mechanical/ natural ventilation	2	1.1
0	0	0	0	0	0	0	n	0	min	0	0	0	0	4-5 days a week	1	0	closed containers	0	0	no cabin	1	0	None	1	1	0	regular inspections	0	No daily cleaning	0.01	0	no control measures	1	0	>1000 m3	3	0	Mechanical/ natural ventilation	2	1.1
0	0	0	0	0	0	0	n	0	min	0	0	0	0	4-5 days a week	1	0	closed containers	0	0	no cabin	1	0	None	1	1	0	regular inspections	0	No daily cleaning	0.01	0	no control measures	1	0	>1000 m3	3	0	Mechanical/ natural ventilation	2	1.1
0	0	0	0	0	0	0	n	0	min	0	0	0	0	4-5 days a week	1	0	closed containers	0	0	no cabin	1	0	None	1	1	0	regular inspections	0	No daily cleaning	0.01	0	no control measures	1	0	>1000 m3	3	0	Mechanical/ natural ventilation	2	1.1
0	0	0	0	0	0	0	n	0	min	0	0	0	0	4-5 days a week	1	0	closed containers	0	0	no cabin	1	0	None	1	1	0	regular inspections	0	No daily cleaning	0.01	0	no control measures	1	0	>1000 m3	3	0	Mechanical/ natural ventilation	2	1.1
0	0	0	0	0	0	0	n	0	min	0	0	0	0	4-5 days a week	1	0	closed containers	0	0	no cabin	1	0	None	1	1	0	regular inspections	0	No daily cleaning	0.01	0	no control measures	1	0	>1000 m3	3	0	Mechanical/ natural ventilation	2	1.1
0	0	0	0	0	0	0	n	0	min	0	0	0	0	4-5 days a week	1	0	closed containers	0	0	no cabin	1	0	None	1	1	0	regular inspections	0	No daily cleaning	0.01	0	no control measures	1	0	>1000 m3	3	0	Mechanical/ natural ventilation	2	1.1
0	0	0	0	0	0	0	n	0	min	0	0	0	0	4-5 days a week	1	0	closed containers	0	0	no cabin	1	0	None	1	1	0	regular inspections	0	No daily cleaning	0.01	0	no control measures	1	0	>1000 m3	3	0	Mechanical/ natural ventilation	2	1.1
0	0	0	0	0	0	0	n	0	min	0	0	0	0	4-5 days a week	1	0	closed containers	0	0	no cabin	1	0	None	1	1	0	regular inspections	0	No daily cleaning	0.01	0	no control measures	1	0	>1000 m3	3	0	Mechanical/ natural ventilation	2	1.1
0	0	0	0	0	0	0	n	0	min	0	0	0	0	4-5 days a week	1	0	closed containers	0	0	no cabin	1	0	None	1	1	0	regular inspections	0	No daily cleaning	0.01	0	no control measures	1	0	>1000 m3	3	0	Mechanical/ natural ventilation	2	1.1
0	0	0	0	0	0	0	n	0	min	0	0	0	0	4-5 days a week	1	0	closed containers	0	0	no cabin	1	0	None	1	1	0	regular inspections	0	No daily cleaning	0.01	0	no control measures	1	0	>1000 m3	3	0	Mechanical/ natural ventilation	2	1.1
0	0	0	0	0	0	0	n	0	min	0	0	0	0	4-5 days a week	1	0	closed containers	0	0	no cabin	1	0	None	1	1	0	regular inspections	0	No daily cleaning	0.01	0	no control measures	1	0	>1000 m3	3	0	Mechanical/ natural ventilation	2	1.1
0	0	0	0	0	0	0	n	0	min	0	0	0	0	4-5 days a week	1	0	closed containers	0	0	no cabin	1	0	None	1	1	0	regular inspections	0	No daily cleaning	0.01	0	no control measures	1	0	>1000 m3	3	0	Mechanical/ natural ventilation	2	1.1
0	0	0	0	0	0	0	n	0	min	0	0	0	0	4-5 days a week	1	0	closed containers	0	0	no cabin	1	0	None	1	1	0	regular inspections	0	No daily cleaning	0.01	0	no control measures	1	0	>1000 m3	3	0	Mechanical/ natural ventilation	2	1.1
0	0	0	0	0	0	0	n	0	min	0	0	0	0	4-5 days a week	1	0	closed containers	0	0	no cabin	1	0	None	1	1	0	regular inspections	0	No daily cleaning	0.01	0	no control measures	1	0	>1000 m3	3	0	Mechanical/ natural ventilation	2	1.1
0	0	0	0	0	0	0	n	0	min	0	0	0	0	4-5 days a week	1	0	closed containers	0	0	no cabin	1	0	None	1	1	0	regular inspections	0	No daily cleaning	0.01	0	no control measures	1	0	>1000 m3	3	0	Mechanical/ natural ventilation	2	1.1
0	0	0	0	0	0	0	n	0	min	0	0	0	0	4-5 days a week	1	0	closed containers	0	0	no cabin	1	0	None	1	1	0	regular inspections	0	No daily cleaning	0.01	0	no control measures	1	0	>1000 m3	3	0	Mechanical/ natural ventilation	2	1.1
0	0	0	0	0	0	0	n	0	min	0	0	0	0	4-5 days a week	1	0	closed containers	0	0	no cabin	1	0	None	1	1	0	regular inspections	0	No daily cleaning	0.01	0	no control measures	1	0	>1000 m3	3	0	Mechanical/ natural ventilation	2	1.1
0	0	0	0	0	0	0	n	0	min	0	0	0	0	4-5 days a week	1	0	closed containers	0	0	no cabin	1	0	None	1	1	0	regular inspections	0	No daily cleaning	0.01	0	no control measures	1	0	>1000 m3	3	0	Mechanical/ natural ventilation	2	1.1
0	0	0	0	0	0	0	n	0	min	0	0	0	0	4-5 days a week	1	0	closed containers	0	0	no cabin	1	0	None	1	1	0	regular inspections	0	No daily cleaning	0.01	0	no control measures	1	0	>1000 m3	3	0	Mechanical/ natural ventilation	2	1.1
0	0	0	0	0	0	0	n	0	min	0	0	0	0	4-5 days a week	1	0	closed containers	0	0	no cabin	1	0	None	1	1	0	regular inspections	0	No daily cleaning	0.01	0	no control measures	1	0	>1000 m3	3	0	Mechanical/ natural ventilation	2	1.1
0	0	0	0	0	0	0	n	0	min	0	0	0	0	4-5 days a week	1	0	closed containers	0	0	no cabin	1	0	None	1	1	0	regular inspections	0	No daily cleaning	0.01	0	no control measures	1	0	>1000 m3	3	0	Mechanical/ natural ventilation	2	1.1
0	0	0	0	0	0	0	n	0	min	0	0	0	0	4-5 days a week	1	0	closed containers	0	0	no cabin	1	0	None	1	1	0	regular inspections	0	No daily cleaning	0.01	0	no control measures	1	0	>1000 m3	3	0	Mechanical/ natural ventilation	2	1.1
0	0	0	0	0	0	0	n	0	min	0	0	0	0	4-5 days a week	1	0	closed containers	0	0	no cabin	1	0	None	1	1	0	regular inspections	0	No daily cleaning	0.01	0	no control measures	1	0	>1000 m3	3	0	Mechanical/ natural ventilation	2	1.1
0	0	0	0	0	0	0	n	0	min	0	0	0	0	4-5 days a week	1	0	closed containers	0	0	no cabin	1	0	None	1	1	0	regular inspections	0	No daily cleaning	0.01	0	no control measures	1	0	>1000 m3	3	0	Mechanical/ natural ventilation	2	1.1
0	0	0	0	0	0	0	n	0	min	0	0	0	0	4-5 days a week	1	0	closed containers	0	0	no cabin	1	0	None	1	1	0	regular inspections	0	No daily cleaning	0.01	0	no control measures	1	0	>1000 m3	3	0	Mechanical/ natural ventilation	2	1.1
0	0	0	0	0	0	0	n	0	min	0	0	0	0	4-5 days a week	1	0	closed containers	0	0	no cabin	1	0	None	1	1	0	regular inspections	0	No daily cleaning	0.01	0	no control measures	1	0	>1000 m3	3	0	Mechanical/ natural ventilation	2	1.1
0	0	0	0	0	0	0	n	0	min	0	0	0	0	4-5 days a week	1	0	closed containers	0	0	no cabin	1	0	None	1	1	0	regular inspections	0	No daily cleaning	0.01	0	no control measures	1	0	>1000 m3	3	0	Mechanical/ natural ventilation	2	1.1
0	0	0	0	0	0	0	n	0	min	0	0	0	0	4-5 days a week	1	0	closed containers	0	0	no cabin	1	0	None	1	1	0	regular inspections	0	No daily cleaning	0.01	0	no control measures	1	0	>1000 m3	3	0	Mechanical/ natural ventilation	2	1.1
0	0	0	0	0	0	0	n	0	min	0	0	0	0	4-5 days a week	1	0	closed containers	0	0	no cabin	1	0	None	1	1	0	regular inspections	0	No daily cleaning	0.01	0	no control measures	1	0	>1000 m3	3	0	Mechanical/ natural ventilation	2	1.1
0	0	0	0	0	0	0	n	0	min	0	0	0	0	4-5 days a week	1	0	closed containers	0	0	no cabin	1	0	None	1	1	0	regular inspections	0	No daily cleaning	0.01	0	no control measures	1	0	>1000 m3	3	0	Mechanical/ natural ventilation	2	1.1
0	0	0	0	0	0	0	n	0	min	0	0	0	0	4-5 days a week	1	0	closed containers	0	0	no cabin	1	0	None	1	1	0	regular inspections	0	No daily cleaning	0.01	0	no control measures	1	0	>1000 m3	3	0	Mechanical/ natural ventilation	2	1.1
0	0	0	0	0	0	0	n	0	min	0	0	0	0	4-5 days a week	1	0	closed containers	0	0	no cabin	1	0	None	1	1	0	regular inspections	0	No daily cleaning	0.01	0	no control measures	1	0	>1000 m3	3	0	Mechanical/ natural ventilation	2	1.1
0	0	0	0	0	0	0	n	0	min	0	0	0	0	4-5 days a week	1	0	closed containers	0	0	no cabin	1	0	None	1	1	0	regular inspections	0	No daily cleaning	0.01	0	no control measures	1	0	>1000 m3	3	0	Mechanical/ natural ventilation	2	1.1
0	0	0	0	0	0	0	n	0	min	0	0	0	0	4-5 days a week	1	0	closed containers	0	0	no cabin	1	0	None	1	1	0	regular inspections	0	No daily cleaning	0.01	0	no control measures	1	0	>1000 m3	3	0	Mechanical/ natural ventilation	2	1.1
0	0	0	0	0	0	0	n	0	min	0	0	0	0	4-5 days a week	1	0	closed containers	0	0	no cabin	1	0	None	1	1	0	regular inspections	0	No daily cleaning	0.01	0	no control measures	1	0	>1000 m3	3	0	Mechanical/ natural ventilation	2	1.1
0	0	0	0	0	0	0	n	0	min	0	0	0	0	4-5 days a week	1	0	closed containers	0	0	no cabin	1	0	None	1	1	0	regular inspections	0	No daily cleaning	0.01	0	no control measures	1	0	>1000 m3	3	0	Mechanical/ natural ventilation	2	1.1
0	0	0	0	0	0	0	n	0	min	0	0	0	0	4-5 days a week	1	0	closed containers	0	0	no cabin	1	0	None	1	1	0	regular inspections	0	No daily cleaning	0.01	0	no control measures	1	0	>1000 m3	3	0	Mechanical/ natural ventilation	2	1.1
0	0	0	0	0	0	0	n	0	min	0	0	0	0	4-5 days a week	1	0	closed containers	0	0	no cabin	1	0	None	1	1	0	regular inspections	0	No daily cleaning	0.01	0	no control measures	1	0	>1000 m3	3	0	Mechanical/ natural ventilation	2	1.1
0	0	0	0	0	0	0	n	0	min	0	0	0	0	4-5 days a week	1	0	closed containers	0	0	no cabin	1	0	None	1	1	0	regular inspections	0	No daily cleaning	0.01	0	no control measures	1	0	>1000 m3	3	0	Mechanical/ natural ventilation	2	1.1
0	0	0	0	0	0	0	n	0	min	0	0	0	0	4-5 days a week	1	0	closed containers	0	0	no cabin	1	0	None	1	1	0	regular inspections	0	No daily cleaning	0.01	0	no control measures	1	0	>1000 m3	3	0	Mechanical/ natural ventilation	2	1.1
0	0	0	0	0	0	0	n	0	min	0	0	0	0	4-5 days a week	1	0	closed containers	0	0	no cabin	1	0	None	1	1	0	regular inspections	0	No daily cleaning	0.01	0	no control measures	1	0	>1000 m3	3	0	Mechanical/ natural ventilation	2	1.1
0	0	0	0	0	0	0	n	0	min	0	0	0	0	4-5 days a week	1	0	closed containers	0	0	no cabin	1	0	None	1	1	0	regular inspections	0	No daily cleaning	0.01	0	no control measures	1	0	>1000 m3	3	0	Mechanical/ natural ventilation	2	1.1
0	0	0	0	0	0	0	n	0	min	0	0	0	0	4-5 days a week	1	0	closed containers	0	0	no cabin	1	0	None	1	1	0	regular inspections	0	No daily cleaning	0.01	0	no control measures	1	0	>1000 m3	3	0	Mechanical/ natural ventilation	2	1.1
0	0	0	0	0	0	0	n	0	min	0	0	0	0	4-5 days a week	1	0	closed containers	0	0	no cabin	1	0	None	1	1	0	regular inspections	0	No daily cleaning	0.01	0	no control measures	1	0	>1000 m3	3	0	Mechanical/ natural ventilation	2	1.1
0	0	0	0	0	0	0	n	0	min	0	0	0	0	4-5 days a week	1	0	closed containers	0	0	no cabin	1	0	None	1	1	0	regular inspections	0	No daily cleaning	0.01	0	no control measures	1	0	>1000 m3	3	0	Mechanical/ natural ventilation	2	1.1
0	0	0	0	0	0	0	n	0	min	0	0	0	0	4-5 days a week	1	0	closed containers	0	0	no cabin	1	0	None	1	1	0	regular inspections	0	No daily cleaning	0.01	0	no control measures	1	0	>1000 m3	3	0	Mechanical/ natural ventilation	2	1.1
0	0	0	0	0	0	0	n	0	min	0	0	0	0	4-5 days a week	1	0	closed containers	0	0	no cabin	1	0	None	1	1	0	regular inspections	0	No daily cleaning	0.01	0	no control measures	1	0	>1000 m3	3	0	Mechanical/ natural ventilation	2	1.1
0	0	0	0	0	0	0	n	0	min	0	0	0	0	4-5 days a week	1	0	closed containers	0	0	no cabin	1	0	None	1	1	0	regular inspections	0	No daily cleaning	0.01	0	no control measures	1	0	>1000 m3	3	0	Mechanical/ natural ventilation	2	1.1
0	0	0	0	0	0	0	n	0	min	0	0	0	0	4-5 days a week	1	0	closed containers	0	0	no cabin	1	0	None	1	1	0	regular inspections	0	No daily cleaning	0.01	0	no control measures	1	0	>1000 m3	3	0	Mechanical/ natural ventilation	2	1.1
0	0	0	0	0	0	0	n	0	min	0	0	0	0	4-5 days a week	1	0	closed containers	0	0	no cabin	1	0	None	1	1	0	regular inspections	0	No daily cleaning	0.01	0	no control measures	1	0	>1000 m3	3	0	Mechanical/ natural ventilation	2	1.1
0	0	0	0	0	0	0	n	0	min	0	0	0	0	4-5 days a week	1	0	closed containers	0	0	no cabin	1	0	None	1	1	0	regular inspections	0	No daily cleaning	0.01	0	no control measures	1	0	>1000 m3	3	0	Mechanical/ natural ventilation	2	1.1
0	0	0	0	0	0	0	n	0	min	0	0	0	0	4-5 days a week	1	0	closed containers	0	0	no cabin	1	0	None	1	1	0	regular inspections	0	No daily cleaning	0.01	0	no control measures	1	0	>1000 m3	3	0	Mechanical/ natural ventilation	2	1.1
0	0	0	0	0	0	0	n	0	min	0	0	0	0	4-5 days a week	1	0	closed containers	0	0	no cabin	1	0	None	1	1	0	regular inspections	0	No daily cleaning	0.01	0	no control measures	1	0	>1000 m3	3	0	Mechanical/ natural ventilation	2	1.1
0	0	0	0	0	0	0	n	0	min	0	0	0	0	4-5 days a week	1	0	closed containers	0	0	no cabin	1	0	None	1	1	0	regular inspections	0	No daily cleaning	0.01	0	no control measures	1	0	>1000 m3	3	0	Mechanical/ natural ventilation	2	1.1
0	0	0	0	0	0	0	n	0	min	0	0	0	0	4-5 days a week	1	0	closed containers	0	0	no cabin	1	0	None	1	1	0	regular inspections	0	No daily cleaning	0.01	0	no control measures	1	0	>1000 m3	3	0	Mechanical/ natural ventilation	2	1.1
0	0	0	0	0	0	0	n	0	min	0	0	0	0	4-5 days a week	1	0	closed containers	0	0	no cabin	1	0	None	1	1	0	regular inspections	0	No daily cleaning	0.01	0	no control measures	1	0	>1000 m3	3	0	Mechanical/ natural ventilation	2	1.1
0	0	0	0	0	0	0	n	0	min	0	0	0	0	4-5 days a week	1	0	closed containers	0	0	no cabin	1	0	None	1	1	0	regular inspections	0	No daily cleaning	0.01	0	no control measures	1	0	>1000 m3	3	0	Mechanical/ natural ventilation	2	1.1
0	0	0	0	0	0	0	n	0	min	0	0	0	0	4-5 days a week	1	0	closed containers	0	0	no cabin	1	0	None	1	1	0	regular inspections	0	No daily cleaning	0.01	0	no control measures	1	0	>1000 m3	3	0	Mechanical/ natural ventilation	2	1.1
0	0	0	0	0	0	0	n	0	min	0	0	0	0	4-5 days a week	1	0	closed containers	0	0	no cabin	1	0	None	1	1	0	regular inspections	0	No daily cleaning	0.01	0	no control measures	1	0	>1000 m3	3	0	Mechanical/ natural ventilation	2	1.1
0	0	0	0	0	0	0	n	0	min	0	0	0	0	4-5 days a week	1	0	closed containers	0	0	no cabin	1	0	None	1	1	0	regular inspections	0	No daily cleaning	0.01	0	no control measures	1	0	>1000 m3	3	0	Mechanical/ natural ventilation	2	1.1

[truncated: 14 more sheets: Skin-MT Hand, Skin-MT body, Skin-HRS local, Skin-HRS systemic, M08,G03, M08 tab 10,11, S08 App. A,C, M08, tab 4,5,6,7,8,9, O03, tab 2,3,5,7,8, O03, G03, tab 1, G03, tab A1, W03, tab 8, PROC]
