# Supplementary material for: Synthesis design using mass related metrics, environmental metrics, and health metrics
Source: publisher site journal article supplement (doi:10.1515/pac-2021-0326), 2022-02-01
Supplement: Supplementary file 7 [file pac-2021-0326_suppl_007_Fig31_Stoffenmanager_BASF_Data.xls]

## Sheet: Stoffenmanager vs BASF
SUPPORTING INFORMATION related to Eissen M., "Synthesis design using mass related metrics, environmental metrics, and health metrics"
Collection of data:				Collection of data for presentation in a table:
Production	Glutaraldehyde	OP-Agly		Production	Glutaraldehyde	OP-Agly		Glutaraldehyde	OP-Agly
Stoffenmanager (normalized)	14.05	2.6		Stoffenmanager (normalized)	14.05	2.6		1	0.185053
BASF (Toxicity potential value (points))	6474.5	64270.4		BASF (Toxicity potential value (points))	6474.5	64270.4		0.100738	1
Normalization	Glutarald.	OP-Agly		Stoffenmanager (normalized)	14.05	2.6		1	0.185053
Stoffenmanag.	1	0.185053		BASF (Toxicity potential value (points))	6474.5	4714.81		1	0.728213
BASF	0.100738	1
without naphta:
Production	Glutarald.	OP-Agly
Stoffenmanager (normalized)	14.05	2.6
BASF (Toxicity potential value (points))	6474.5	4714.81
Normalization	Glutarald.	OP-Agly
Stoffenmanag.	1	0.185053
BASF	1	0.728213
